# Supplementary material for: Terretonin, ophiobolin, and drimaneterpenes with absolute configurations from an algicolous Aspergillus ustus
Source: Royal Society of Chemistry journal article supplement (doi:10.1039/c2ra22701k), 2012-11-09
Supplement: c2ra22701k.pdf [file c2ra22701k.pdf]

## Supplementary Information

### Terretonin, ophiobolin, and drimane terpenes with absolute configurations from an algicolous *Aspergillus ustus*

Xiang-Hong Liu,<sup>a</sup> Feng-Ping Miao,<sup>a</sup> Ming-Feng Qiao,<sup>a</sup> Robert H. Cichewicz<sup>b</sup> and Nai-Yun Ji\*<sup>a</sup>

<sup>a</sup>*Yantai Institute of Coastal Zone Research, Chinese Academy of Sciences, Yantai 264003, China*

<sup>b</sup>*University of Oklahoma, Norman, Oklahoma 73019, United States*

#### Contents

- S3, <sup>1</sup>H NMR spectrum of compound **1**;
- S4, <sup>13</sup>C NMR and DEPT spectra of compound **1**;
- S5, HSQC spectrum of compound **1**;
- S6, HMBC spectrum of compound **1**;
- S7, <sup>1</sup>H-<sup>1</sup>H COSY spectrum of compound **1**;
- S8, NOESY spectrum of compound **1**;
- S9, <sup>1</sup>H NMR spectrum of compound **2**;
- S10, <sup>13</sup>C NMR and DEPT spectra of compound **2**;
- S11, HSQC spectrum of compound **2**;
- S12, HMBC spectrum of compound **2**;
- S13, Expanded HMBC spectrum of compound **2**;
- S14, <sup>1</sup>H-<sup>1</sup>H COSY spectrum of compound **2**;
- S15, NOESY spectrum of compound **2**;
- S16, HREIMS spectrum of compound **2**;
- S17, <sup>1</sup>H NMR spectrum of compound **3**;
- S18, <sup>13</sup>C NMR and DEPT spectra of compound **3**;
- S19, HSQC spectrum of compound **3**;
- S20, HMBC spectrum of compound **3**;
- S21, <sup>1</sup>H-<sup>1</sup>H COSY spectrum of compound **3**;
- S22, NOESY spectrum of compound **3**;
- S23, HREIMS spectrum of compound **3**;
- S24, <sup>1</sup>H NMR spectrum of compound **4**;
- S25, <sup>13</sup>C NMR and DEPT spectra of compound **4**;
- S26, HSQC spectrum of compound **4**;
- S27, HMBC spectrum of compound **4**;

- S28,  $^1\text{H}$ - $^1\text{H}$  COSY spectrum of compound **4**;
- S29, NOESY spectrum of compound **4**;
- S30, HREIMS spectrum of compound **4**;
- S31,  $^1\text{H}$  NMR spectrum of compound **5**;
- S32,  $^{13}\text{C}$  NMR and DEPT spectra of compound **5**;
- S33, HSQC spectrum of compound **5**;
- S34, HMBC spectrum of compound **5**;
- S35,  $^1\text{H}$ - $^1\text{H}$  COSY spectrum of compound **5**;
- S36, NOESY spectrum of compound **5**;
- S37, HRESIMS spectrum of compound **5**;
- S38,  $^1\text{H}$  NMR spectrum of compound **6**;
- S39,  $^{13}\text{C}$  NMR and DEPT spectra of compound **6**;
- S40, HSQC spectrum of compound **6**;
- S41, HMBC spectrum of compound **6**;
- S42,  $^1\text{H}$ - $^1\text{H}$  COSY spectrum of compound **6**;
- S43, NOESY spectrum of compound **6**;
- S44, HREIMS spectrum of compound **6**;
- S45,  $^1\text{H}$  NMR spectrum of compound **7**;
- S46,  $^{13}\text{C}$  NMR and DEPT spectra of compound **7**;
- S47, HSQC spectrum of compound **7**;
- S48, HMBC spectrum of compound **7**;
- S49,  $^1\text{H}$ - $^1\text{H}$  COSY spectrum of compound **7**;
- S50, NOESY spectrum of compound **7**;
- S51, HREIMS spectrum of compound **7**;
- S52,  $^1\text{H}$  NMR spectrum of compound **13/14**;
- S53,  $^{13}\text{C}$  NMR and DEPT spectra of compound **13/14**;
- S54, HSQC spectrum of compound **13/14**;
- S55, HMBC spectrum of compound **13/14**;
- S56,  $^1\text{H}$ - $^1\text{H}$  COSY spectrum of compound **13/14**;
- S57, NOESY spectrum of compound **13/14**;
- S58, HRESIMS spectrum of compound **13/14**;
- S59, Cartesian coordinates for energy-minimized conformer of **2** optimized at the B3LYP/6-31G(d) level in methanol;
- S60, Cartesian coordinates for energy-minimized conformer of **3** optimized at the B3LYP/6-31G(d) level in methanol;
- S61, Cartesian coordinates for energy-minimized conformer of **12** optimized at the B3LYP/6-31G(d) level in methanol.

cf42-7

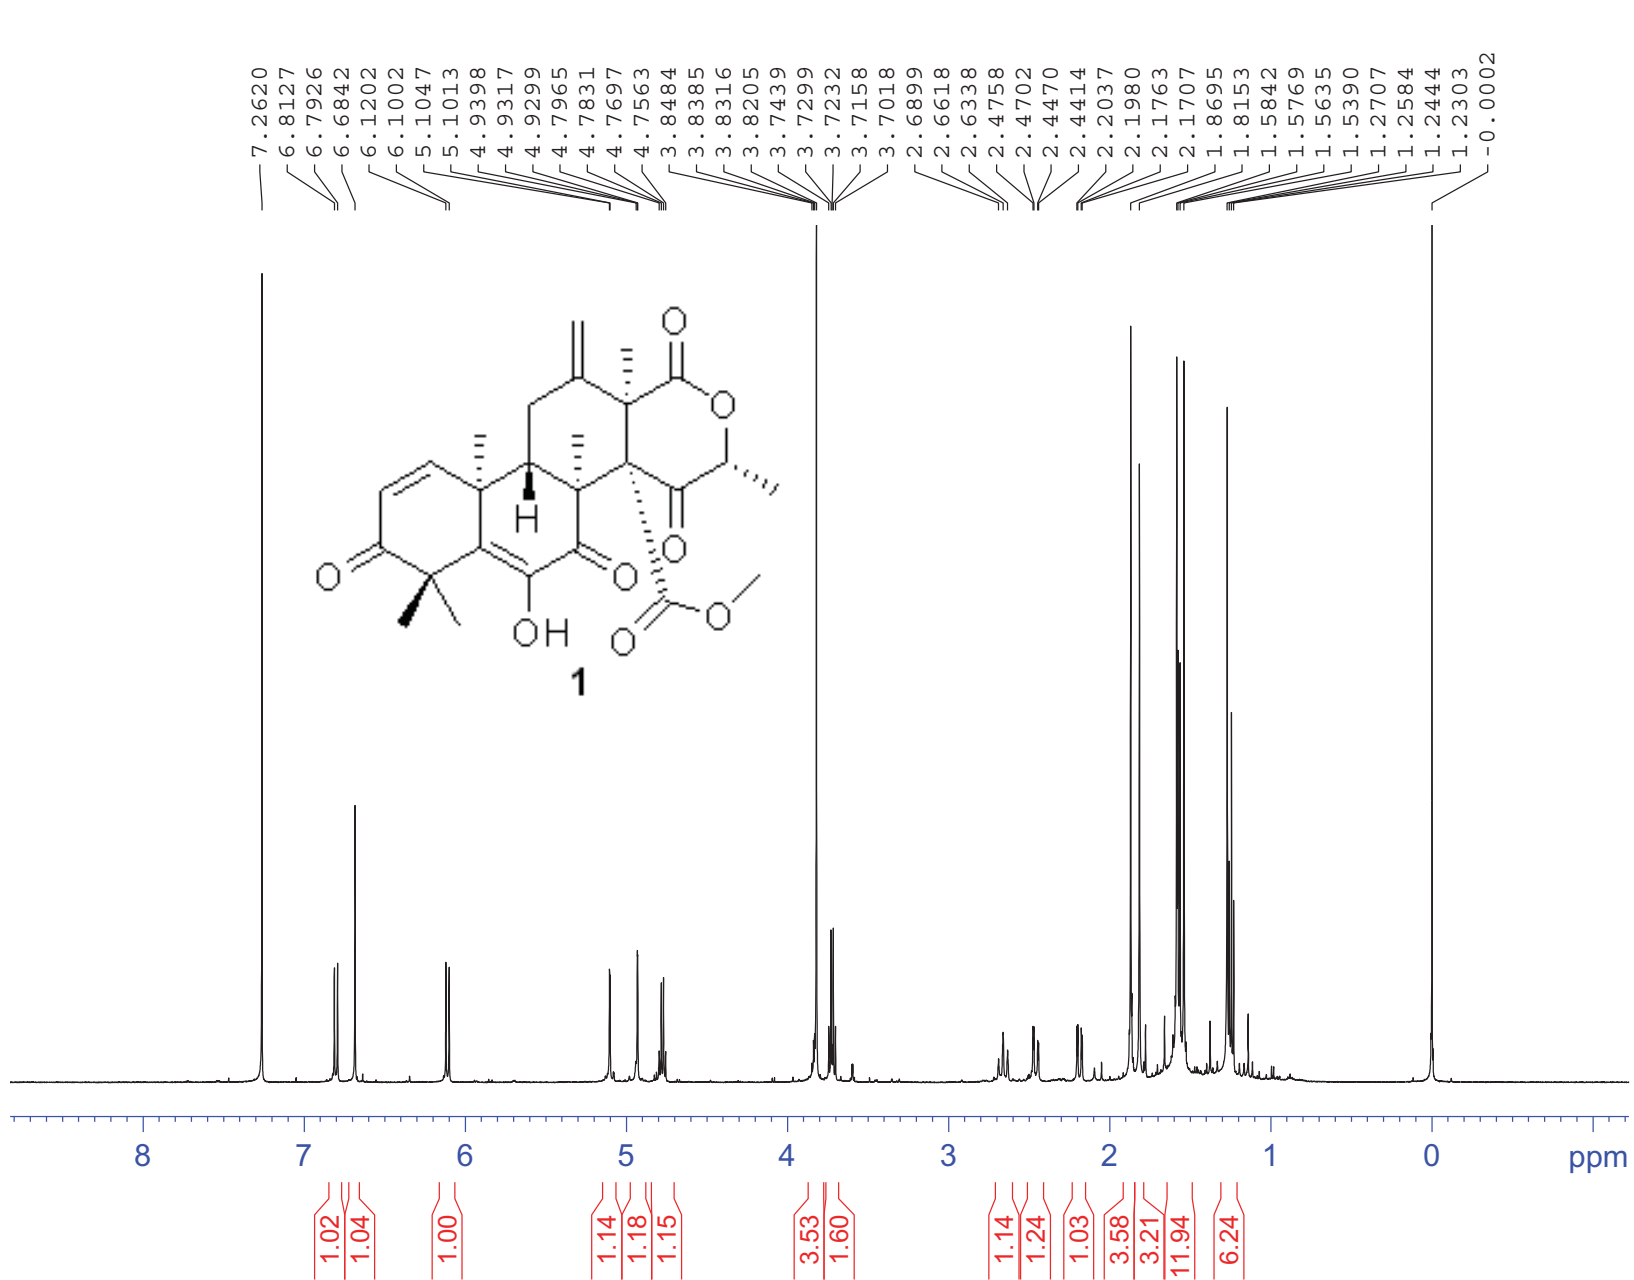

```
NAME 110221
EXPNO 1
PROCNO 1
Date_ 20110221
Time 9.39
INSTRUM spect
PROBHD 5 mm PABBO BB-
PULPROG zg30
TD 65536
SOLVENT CDCl3
NS 8
DS 0
SWH 10330.578 Hz
FIDRES 0.157632 Hz
AQ 3.1719923 sec
RG 144
DW 48.400 usec
DE 6.50 usec
TE 298.0 K
D1 1.00000000 sec
TD0 1

===== CHANNEL f1 =====
NUC1 1H
P1 11.90 usec
PL1 0.35 dB
PL1W 19.76737595 W
SFO1 500.1330885 MHz
SI 32768
SF 500.1300125 MHz
WDW EM
SSB 0
LB 0.30 Hz
GB 0
PC 1.00
```

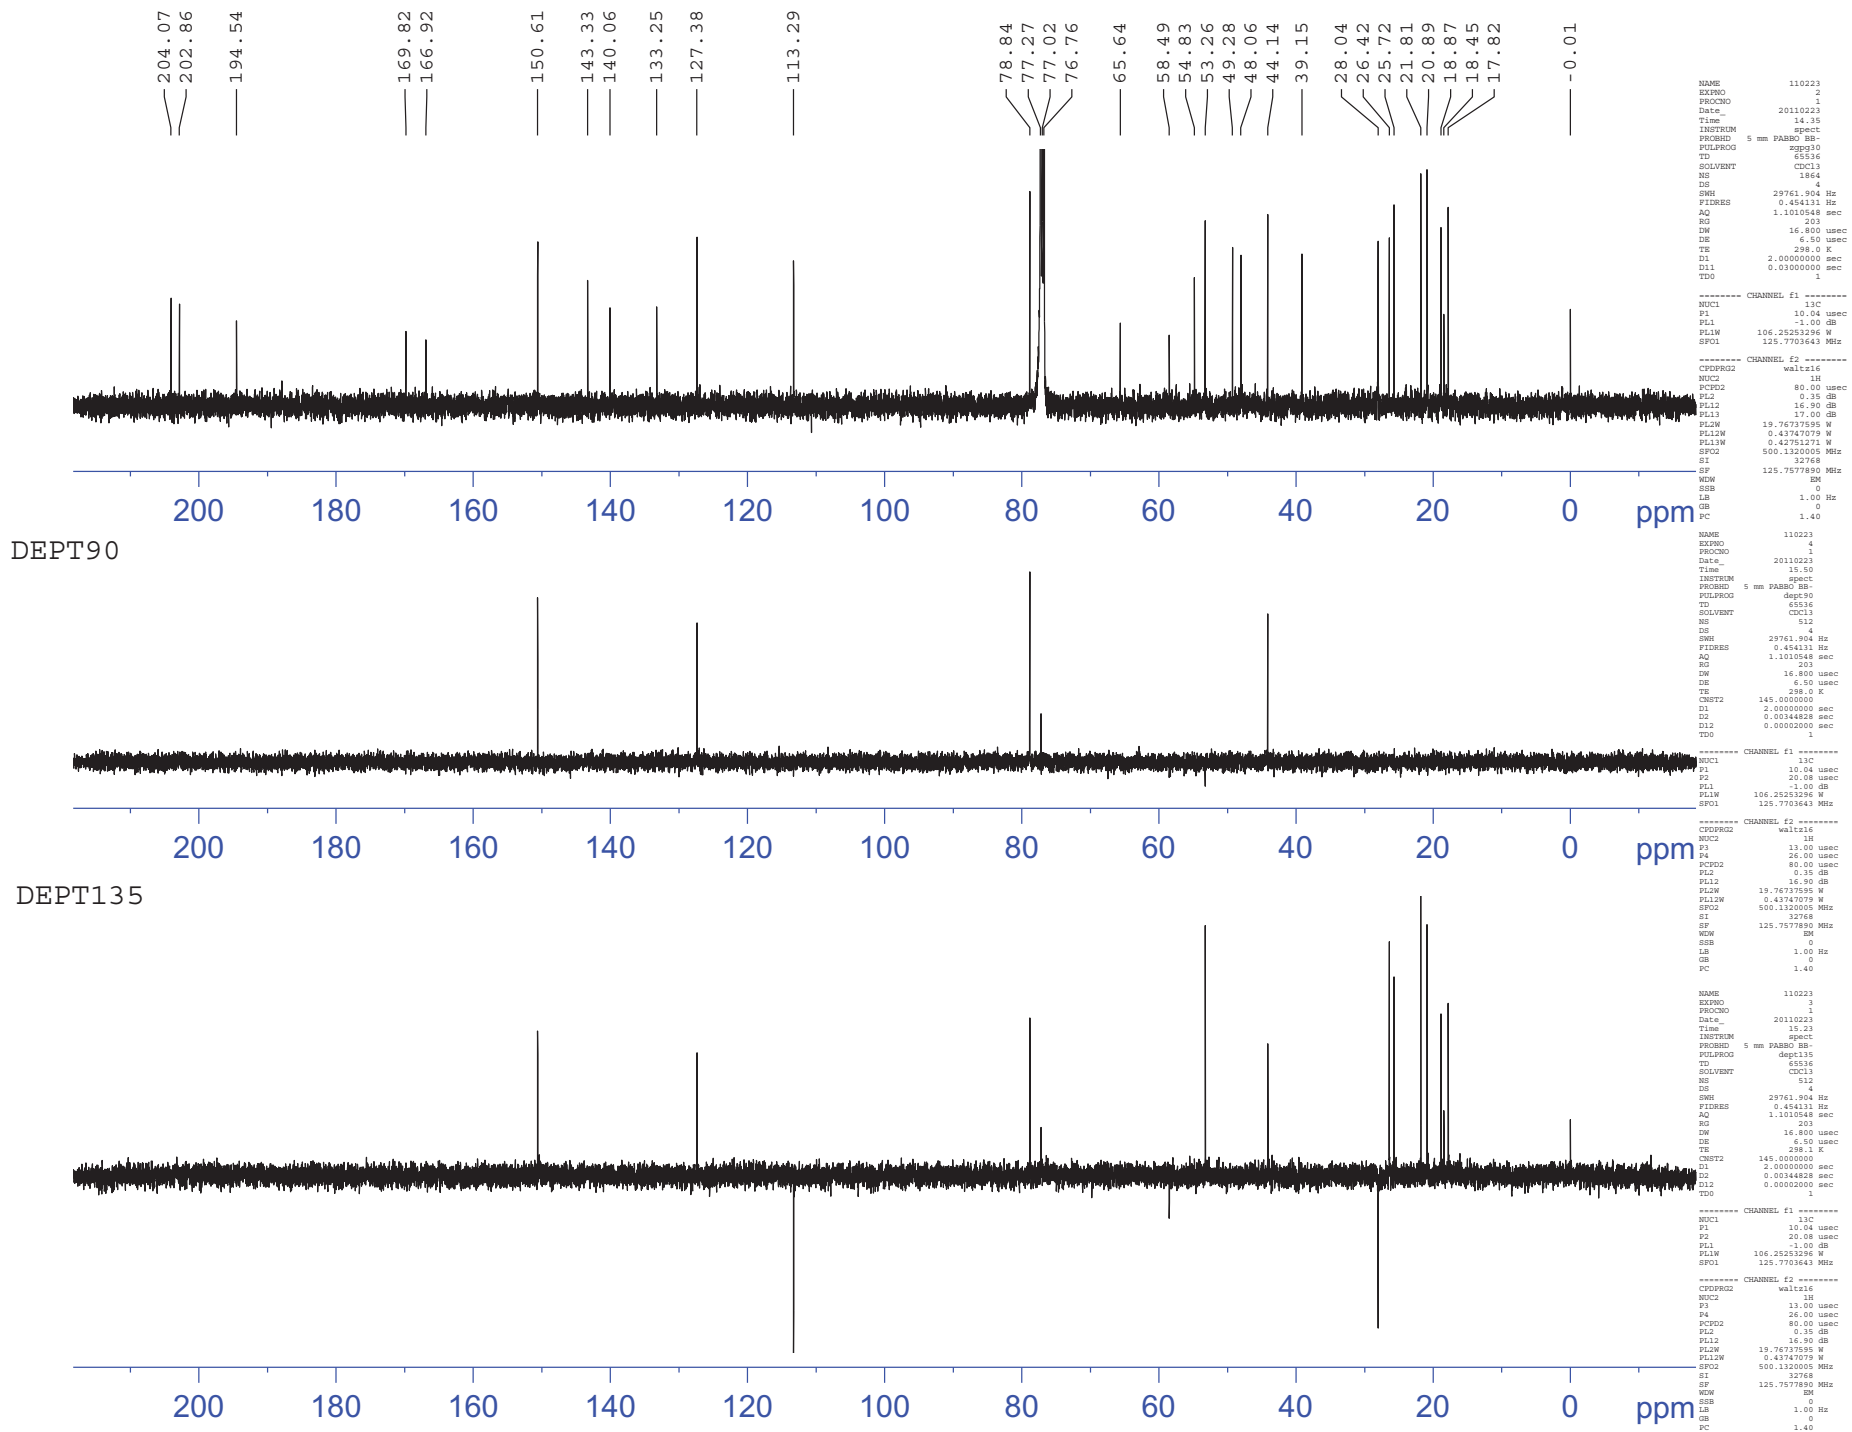

hsqc\_cr42-7

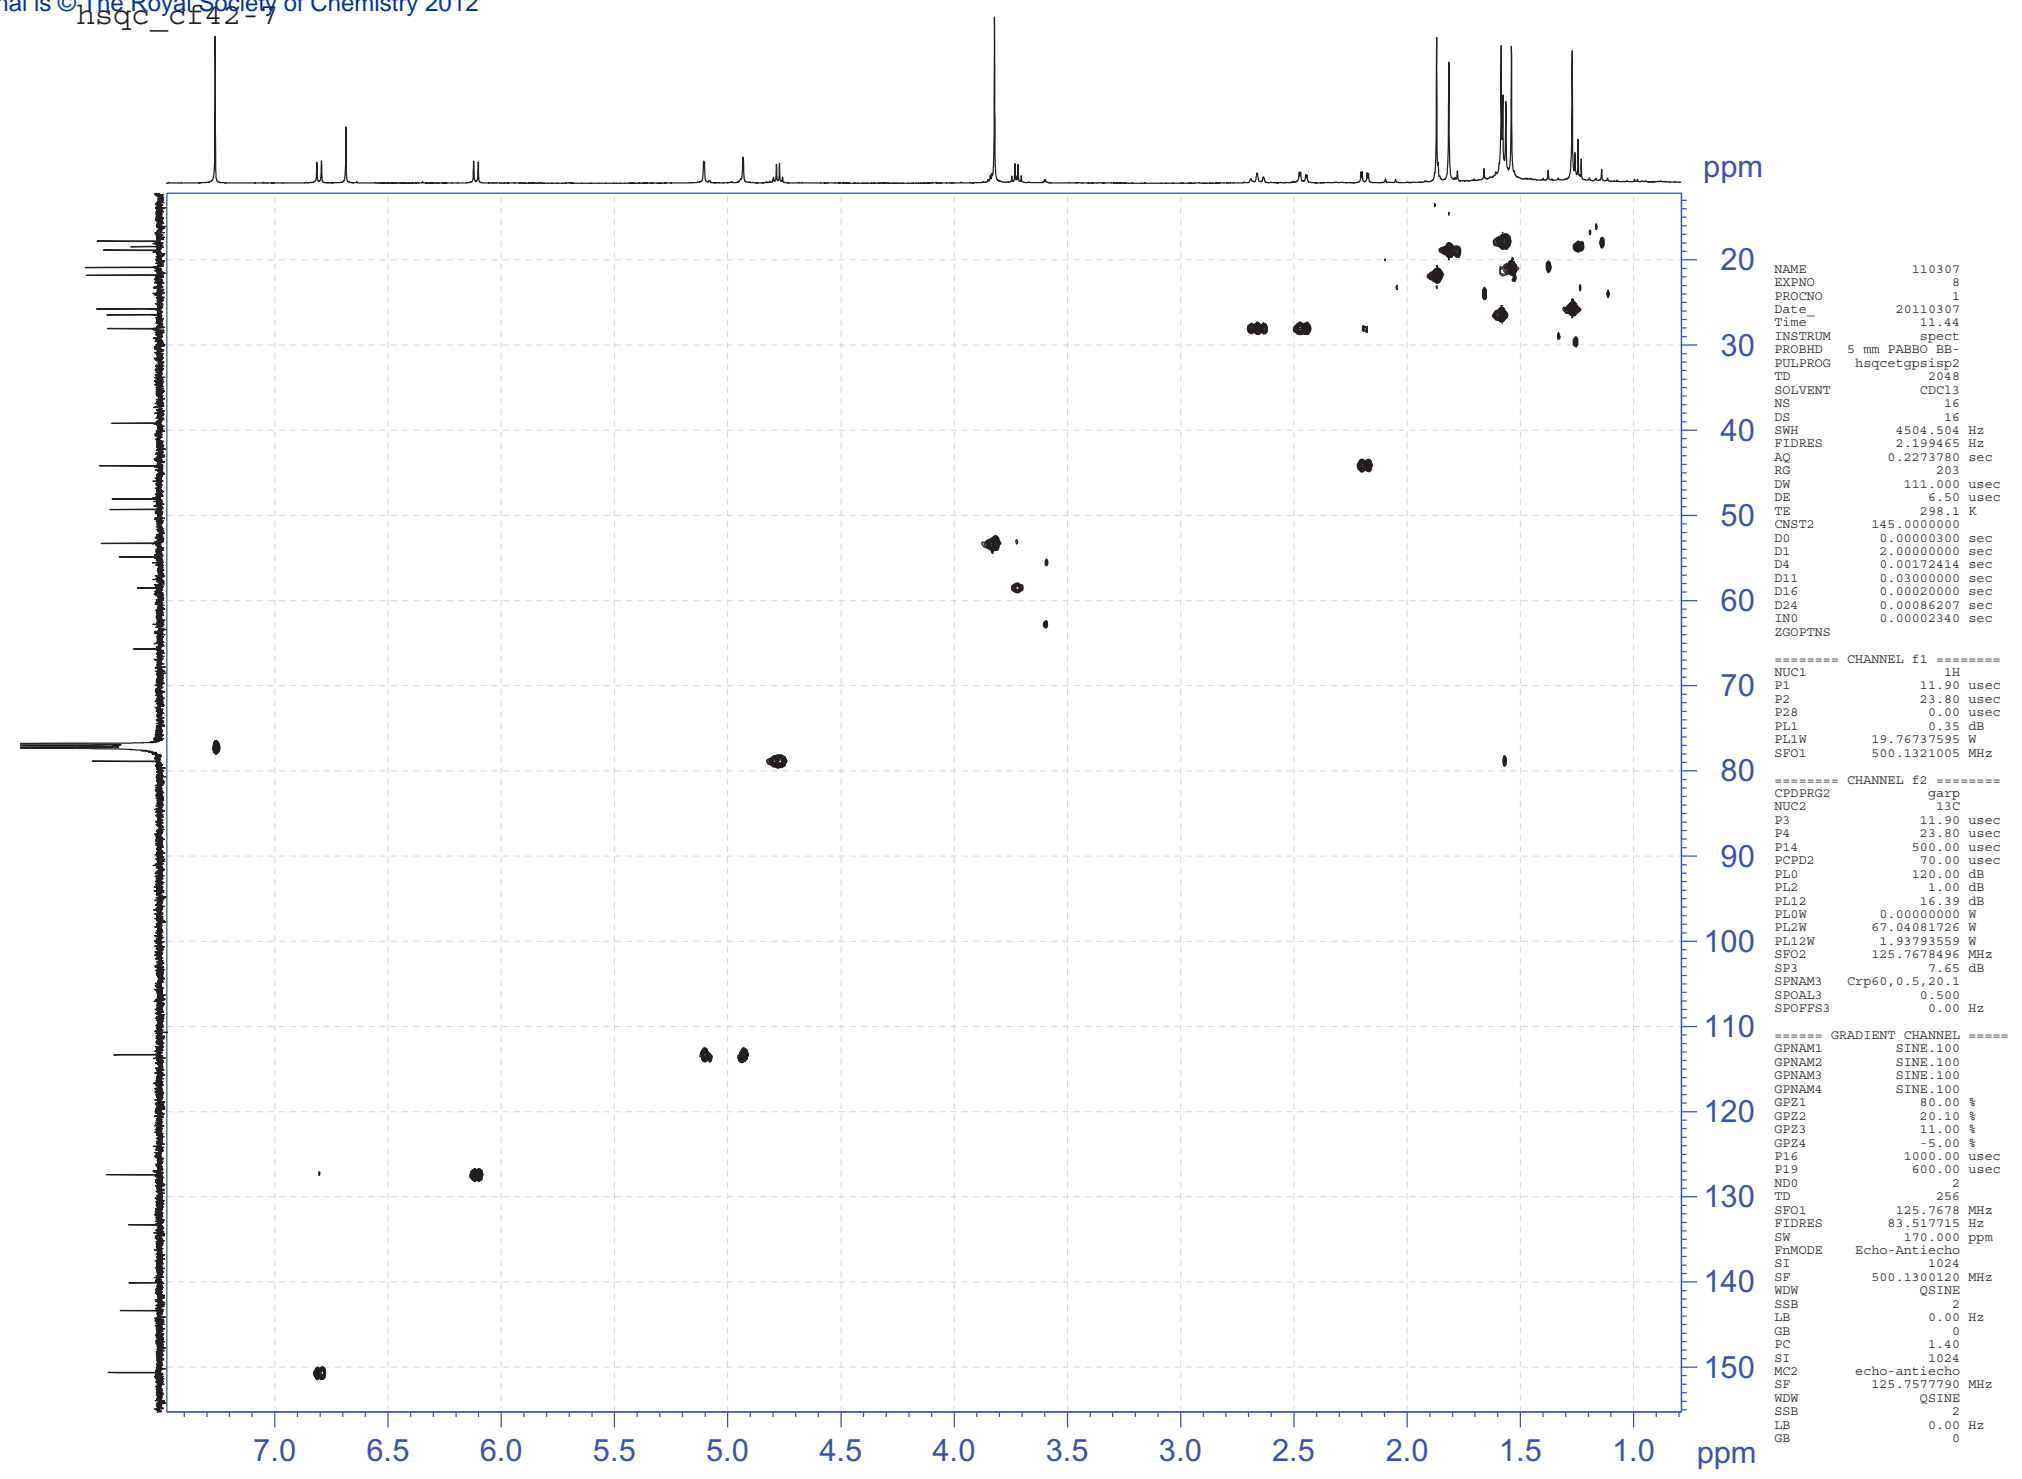

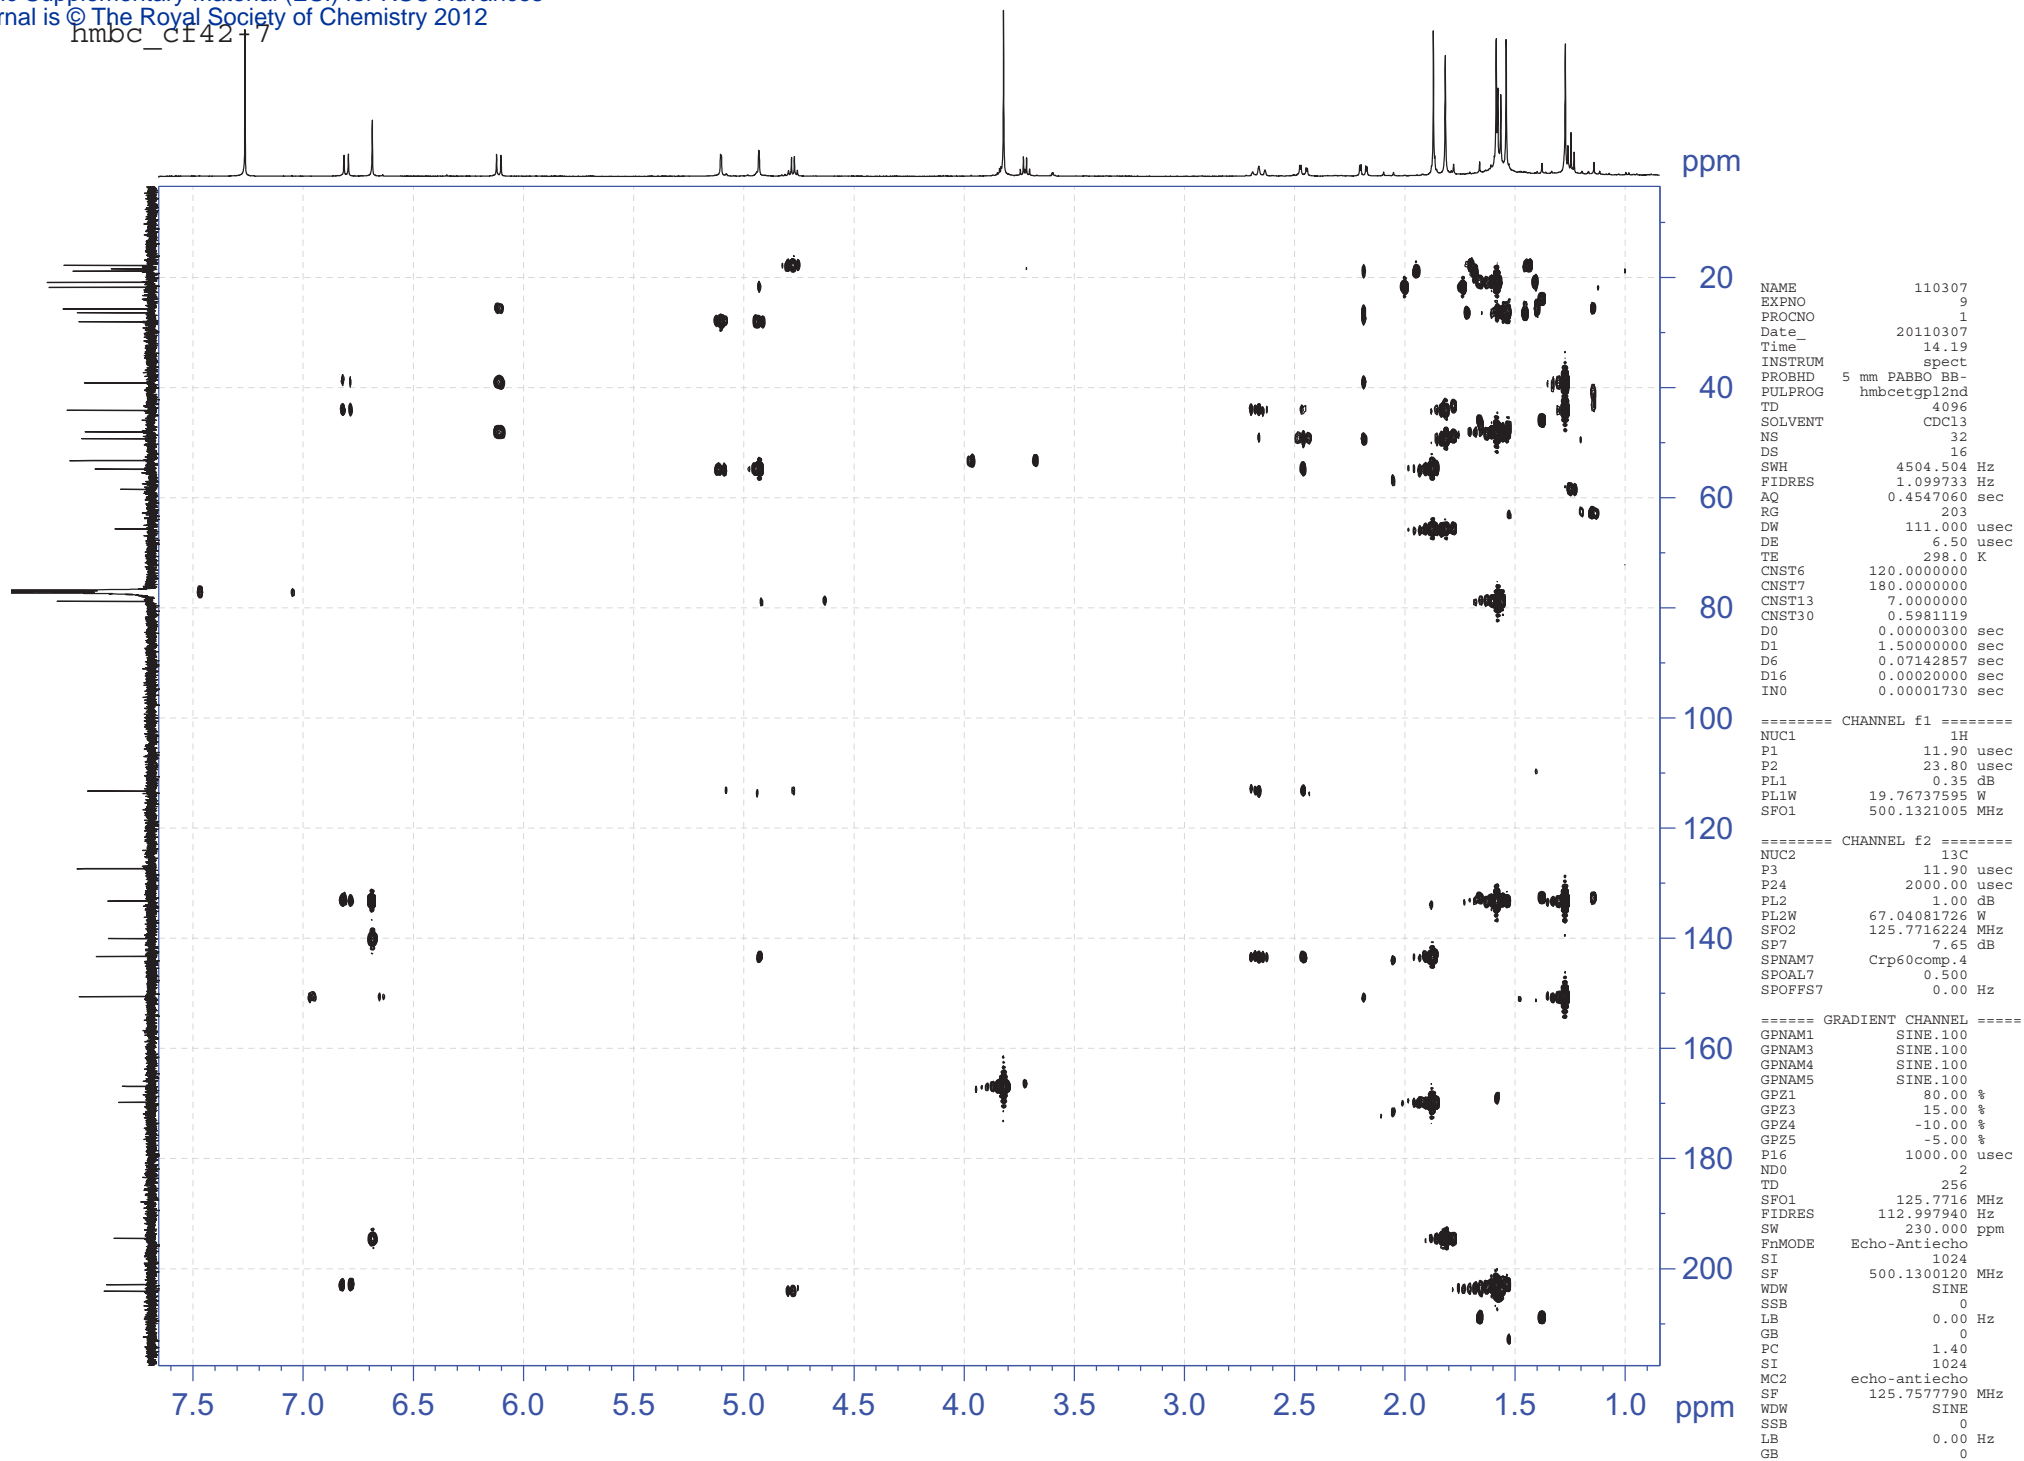

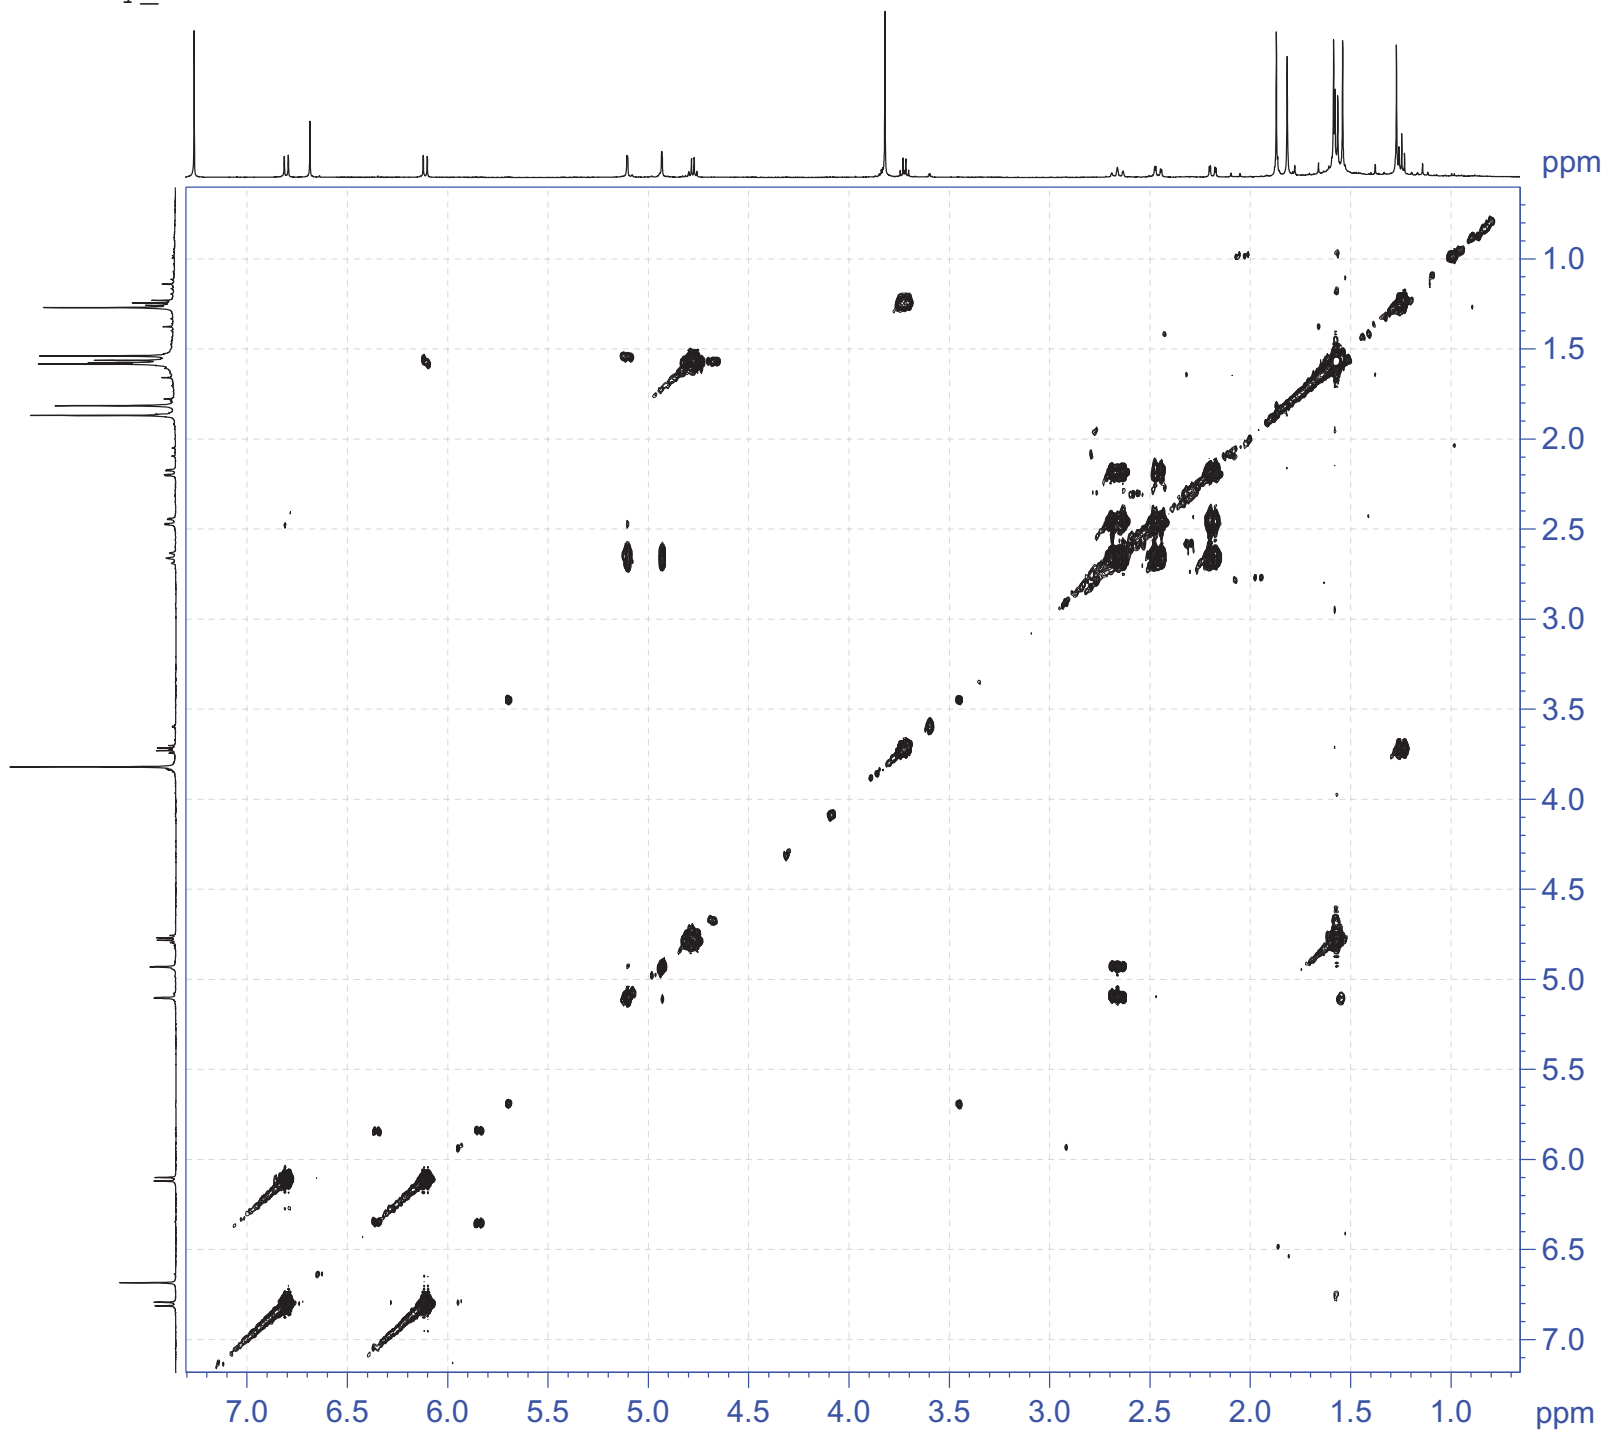

NAME 110307  
EXPNO 7  
PROCNO 1  
Date\_ 20110307  
Time 11.03  
INSTRUM spect  
PROBHD 5 mm PABBO BB-  
PULPROG cosygpmfzf  
TD 2048  
SOLVENT CDCl3  
NS 4  
DS 16  
SWH 4504.504 Hz  
FIDRES 2.199465 Hz  
AQ 0.2273780 sec  
RG 203  
DW 111.000 usec  
DE 6.50 usec  
TE 298.0 K  
D0 0.00000300 sec  
D1 2.00000000 sec  
D13 0.00000400 sec  
D16 0.00020000 sec  
INO 0.00022215 sec

==== CHANNEL f1 =====  
NUC1 1H  
P1 11.90 usec  
PL1 0.35 dB  
PL1W 19.76737595 W  
SFO1 500.1321005 MHz

===== GRADIENT CHANNEL =====  
GPNAM1 SINE.100  
GPNAM2 SINE.100  
GPNAM3 SINE.100  
GPZ1 16.00 %  
GPZ2 12.00 %  
GPZ3 40.00 %  
P16 1000.00 usec  
ND0 1  
TD 256  
SFO1 500.1321 MHz  
FIDRES 17.582769 Hz  
SW 9.000 ppm  
FnMODE QF  
SI 1024  
SF 500.1300122 MHz  
WDW SINE  
SSB 0  
LB 0.00 Hz  
GB 0  
PC 1.40  
SI 1024  
MC2 QF  
SF 500.1300122 MHz  
WDW SINE  
SSB 0  
LB 0.00 Hz  
GB 0

noesy\_cf42-7

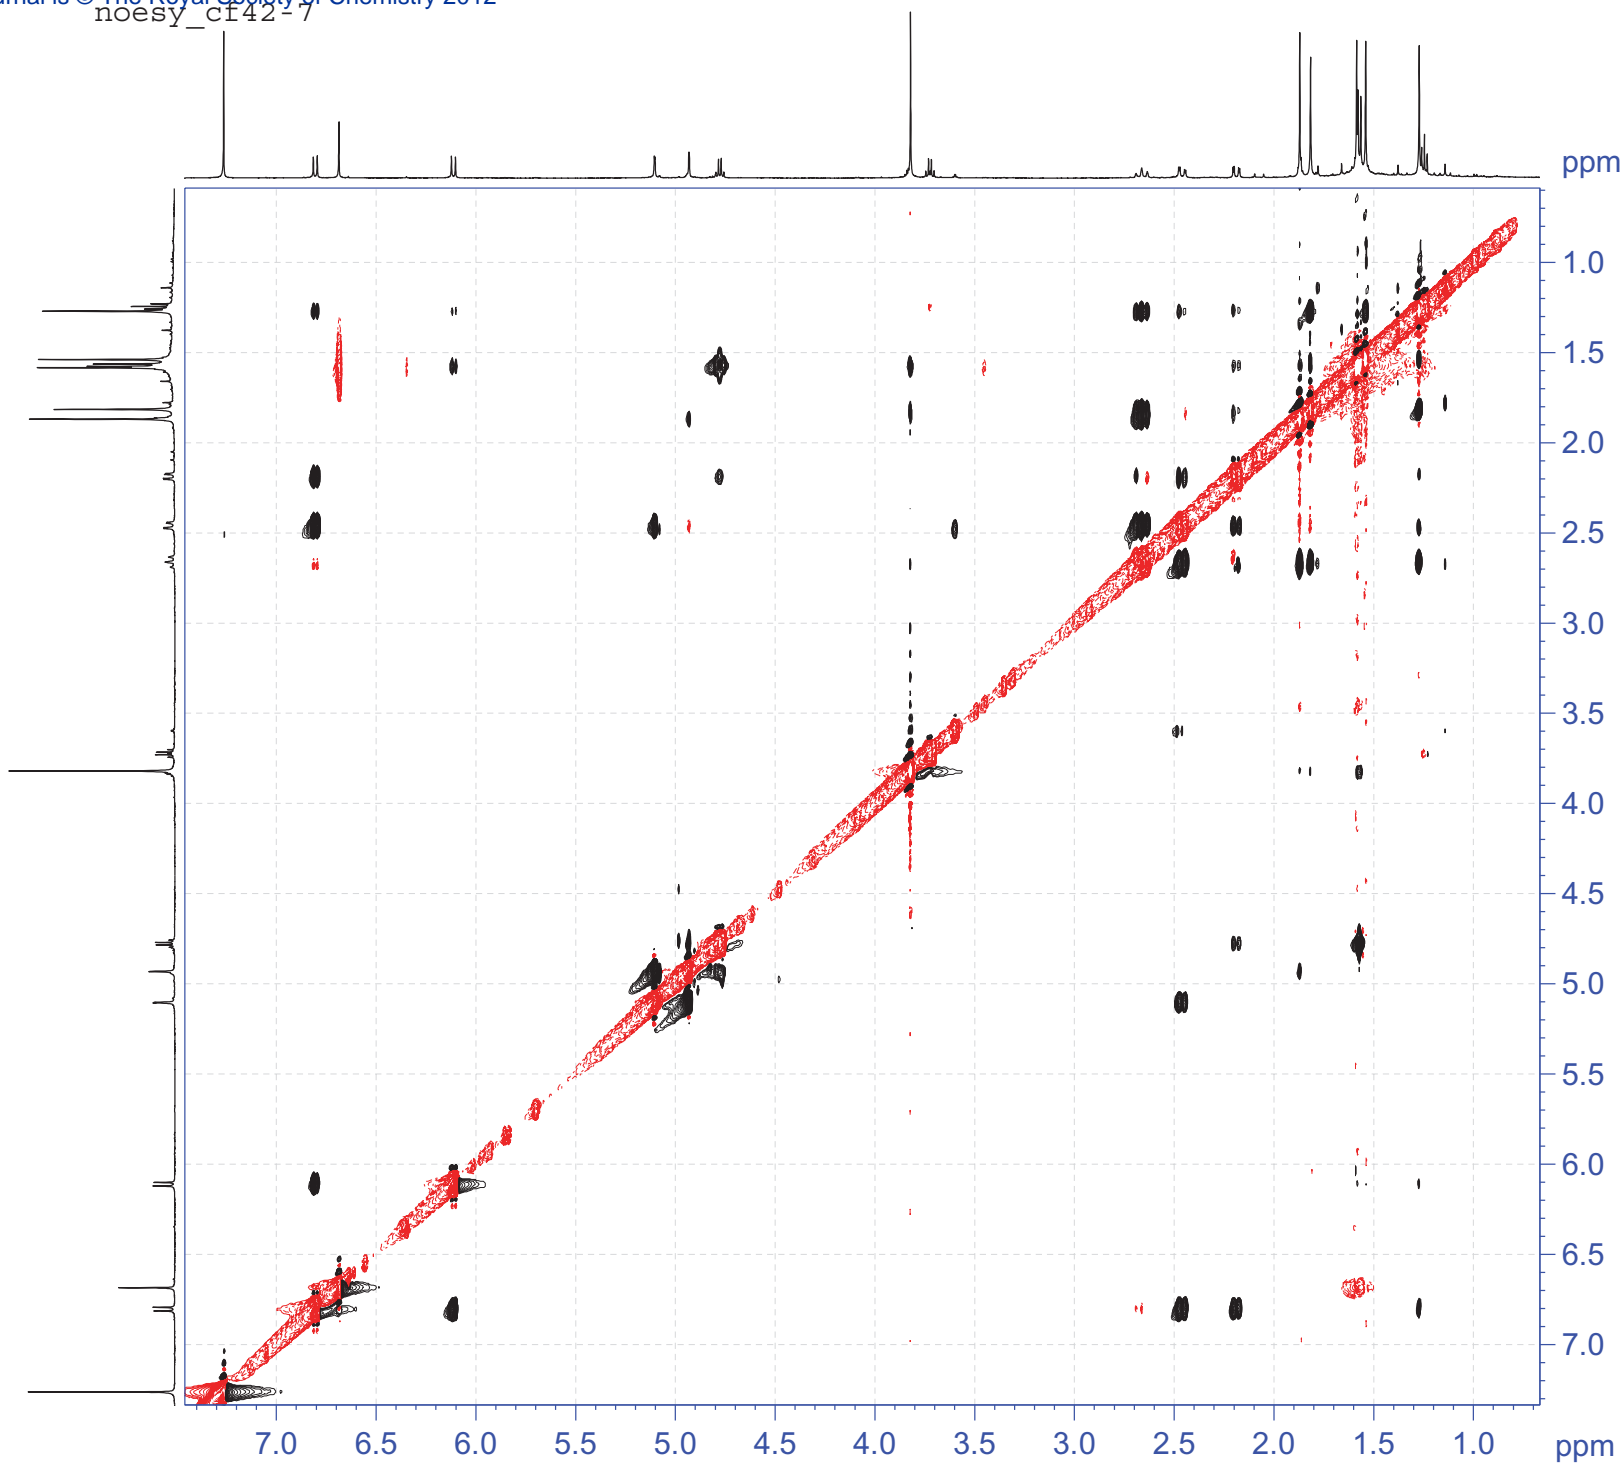

```
NAME          110307
EXPNO         10
PROCNO        1
Date_         20110307
Time          18.58
INSTRUM       spect
PROBHD        5 mm PABBO BB-
PULPROG       noesygpqh
TD            2048
SOLVENT       CDCl3
NS            8
DS            16
SWH           4504.504 Hz
FIDRES        2.199465 Hz
AQ            0.2273780 sec
RG            203
DW            111.000 usec
DE            6.50 usec
TE            298.0 K
D0            0.00009593 sec
D1            2.00000000 sec
D8            0.89999998 sec
D16           0.00020000 sec
INO           0.00022215 sec
```

```
===== CHANNEL f1 =====
NUC1          1H
P1            11.90 usec
P2            23.80 usec
PL1           0.35 dB
PL1W          19.76737595 W
SFO1          500.1321005 MHz
```

```
===== GRADIENT CHANNEL =====
GPNAM1        SINE.100
GPNAM2        SINE.100
GPZ1          40.00 %
GPZ2          -40.00 %
P16           1000.00 usec
ND0           1
TD            256
SFO1          500.1321 MHz
FIDRES        17.582769 Hz
SW            9.000 ppm
FnMODE        States-TPPI
SI            1024
SF            500.1300120 MHz
WDW           QSINE
SSB           2
LB            0.00 Hz
GB            0
PC            1.00
SI            1024
MC2           States-TPPI
SF            500.1300120 MHz
WDW           QSINE
SSB           2
LB            0.00 Hz
GB            0
```



cf42-10

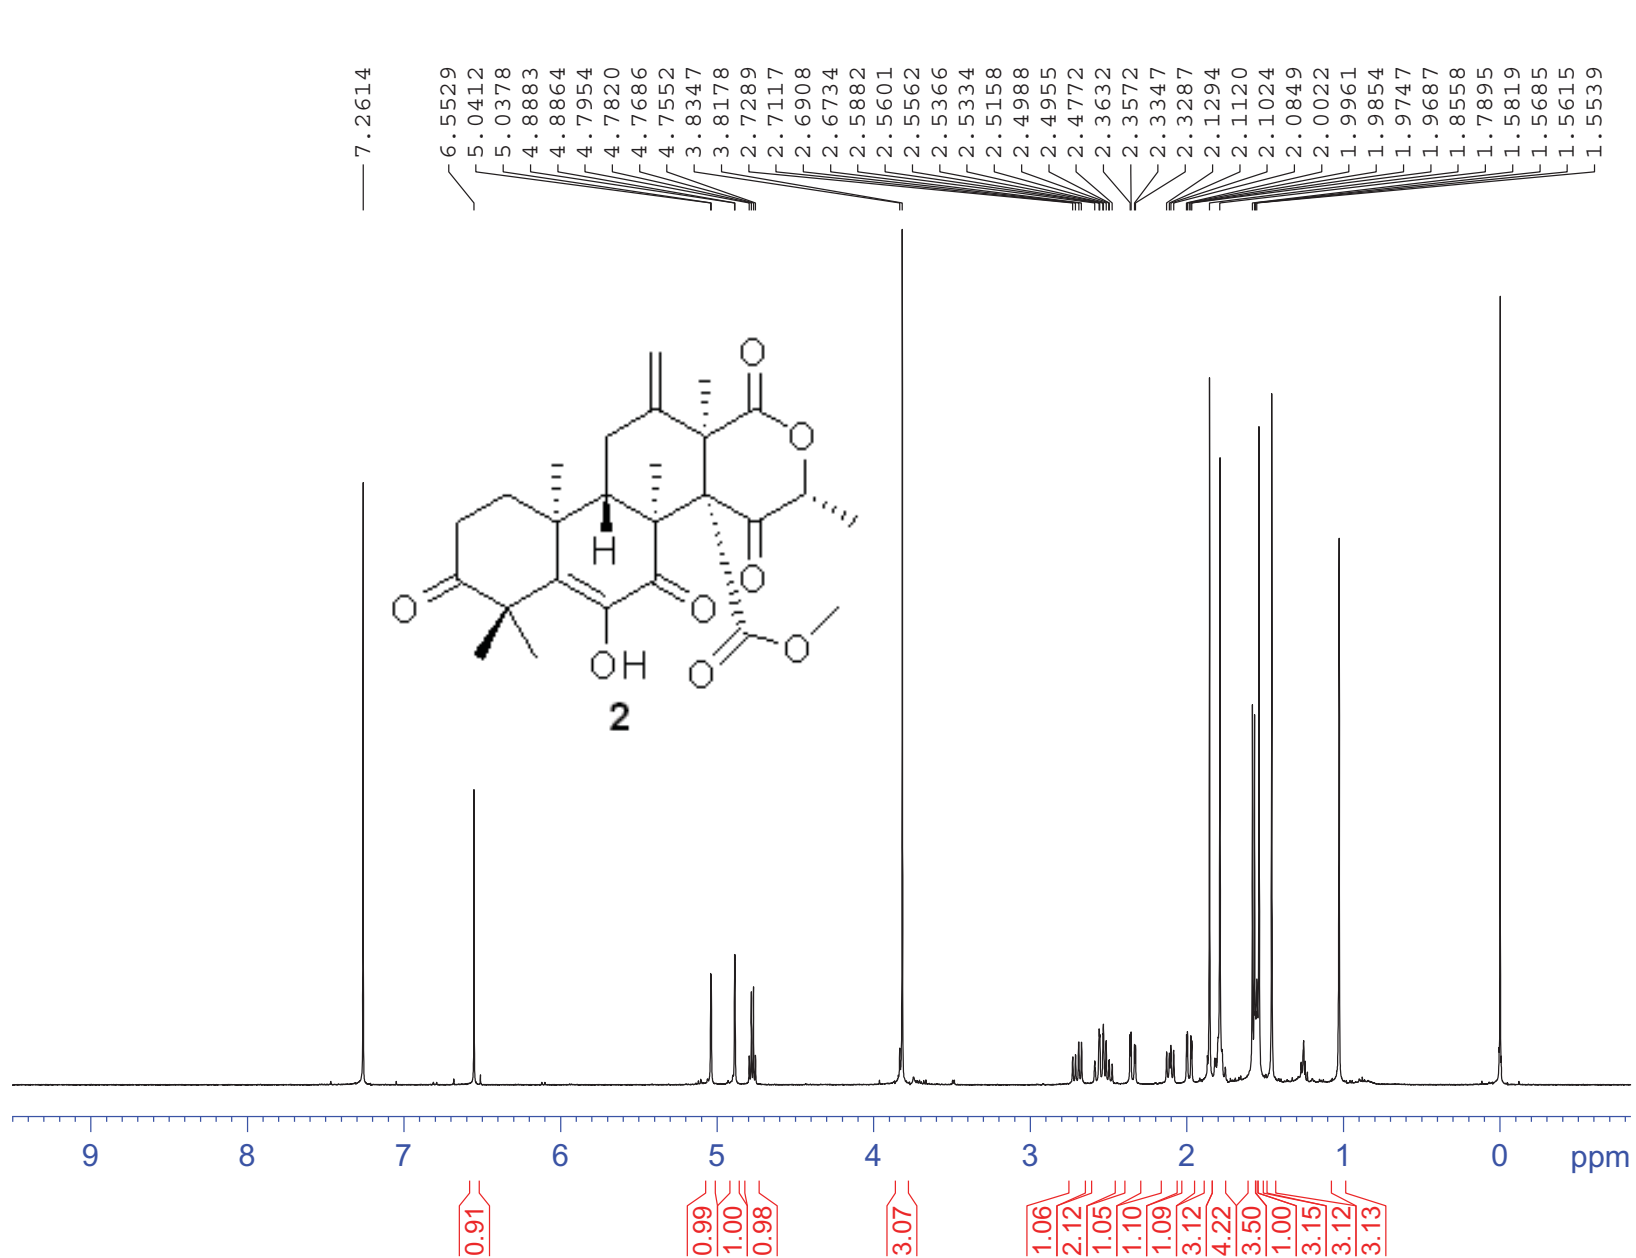

```
NAME 110119
EXPNO 5
PROCNO 1
Date_ 20110119
Time 12.35
INSTRUM spect
PROBHD 5 mm PABBO BB-
PULPROG zg30
TD 65536
SOLVENT CDCl3
NS 8
DS 0
SWH 10330.578 Hz
FIDRES 0.157632 Hz
AQ 3.171923 sec
RG 144
DW 48.400 usec
DE 6.50 usec
TE 298.0 K
D1 1.00000000 sec
TD0 1

===== CHANNEL f1 =====
NUC1 1H
P1 11.90 usec
PL1 0.35 dB
PL1W 19.76737595 W
SFO1 500.1330885 MHz
SI 32768
SF 500.1300128 MHz
WDW EM
SSB 0
LB 0.30 Hz
GB 0
PC 1.00
```

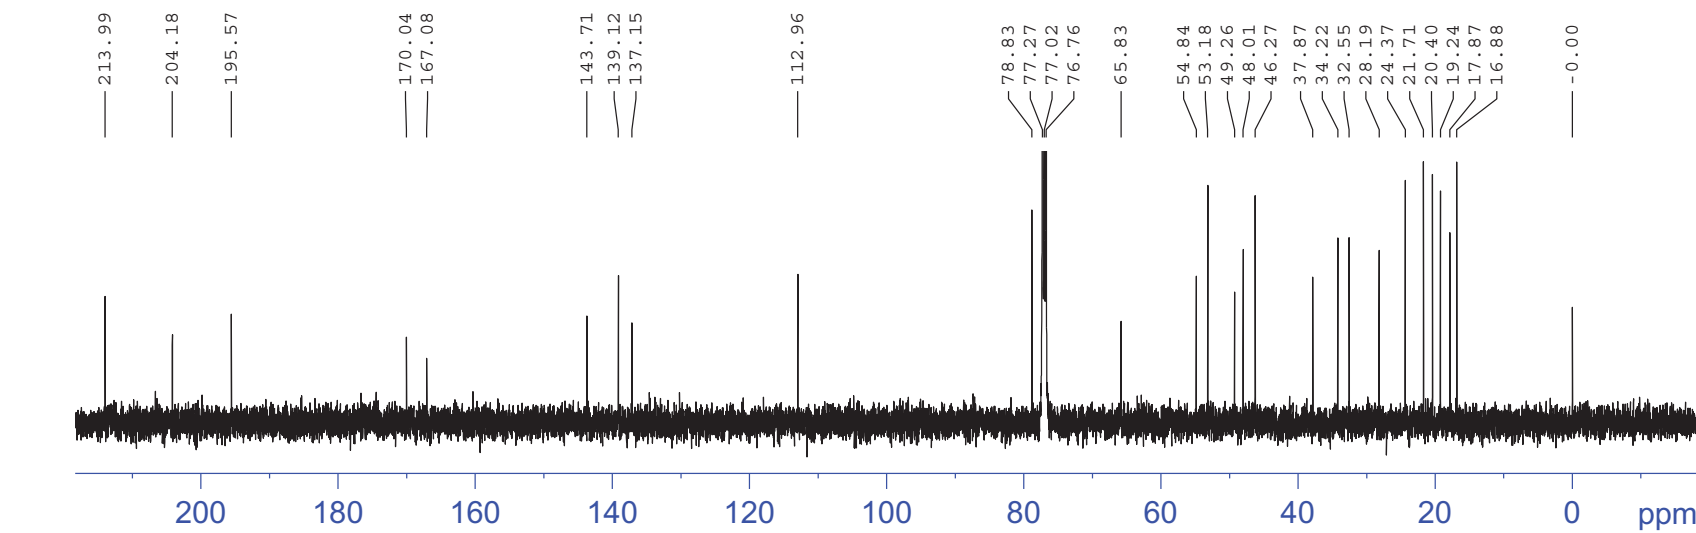

```
NAME 110119
EXPNO 6
PROCNO 1
Date_ 20110119
Time 13.30
INSTRUM spect
PROBHD 5 mm PABBO BB-
PULPROG zgpg30
TD 65536
SOLVENT CDCl3
NS 1024
DS 4
SWH 29761.904 Hz
FIDRES 0.454113 Hz
AQ 1.1101048 sec
RG 203
ZW 16.800 usec
DE 6.50 usec
TE 298.0 K
D1 2.0000000 sec
D11 0.0300000 sec
TD0 1
----- CHANNEL f1 -----
NUC1 13C
P1 10.04 usec
PL1 -1.00 dB
PL1W 106.25253296 W
SFO1 125.7703643 MHz
----- CHANNEL f2 -----
CHDPRG2 waltz16
NUC2 1H
PCP2 80.00 usec
P2 0.35 dB
PL1 16.90 dB
PL13 17.00 dB
PL2W 19.76737595 W
PL1W 0.43747079 W
PL13W 0.42751271 W
SFO2 500.1320005 MHz
SI 32768
SF 125.7577890 MHz
WDW EM
SSB 0
LB 1.00 Hz
GB 0
PC 1.40
```

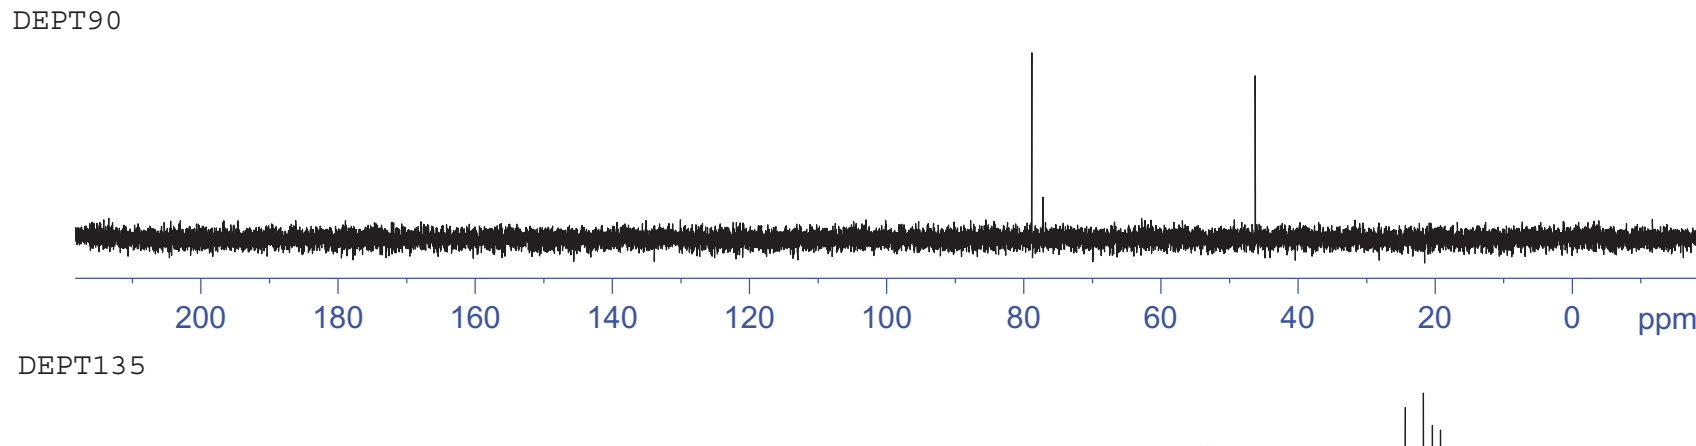

```
NAME 110119
EXPNO 8
PROCNO 1
Date_ 20110119
Time 13.57
INSTRUM spect
PROBHD 5 mm PABBO BB-
PULPROG zgpg30
TD 65536
SOLVENT CDCl3
NS 256
DS 4
SWH 29761.904 Hz
FIDRES 0.454113 Hz
AQ 1.1101048 sec
RG 203
ZW 16.800 usec
DE 6.50 usec
TE 298.0 K
CNST2 145.0000000
D1 2.0000000 sec
D2 0.00344828 sec
D12 0.00002000 sec
TD0 1
----- CHANNEL f1 -----
NUC1 13C
P1 10.04 usec
P2 20.08 usec
PL1 -1.00 dB
PL1W 106.25253296 W
SFO1 125.7703643 MHz
----- CHANNEL f2 -----
CHDPRG2 waltz16
NUC2 1H
P4 13.00 usec
P4 26.00 usec
PCP2 80.00 usec
P2 0.35 dB
PL1 16.90 dB
PL2 0.35 dB
PL12 16.90 dB
PL2W 19.76737595 W
PL1W 0.43747079 W
SFO2 500.1320005 MHz
SI 32768
SF 125.7577890 MHz
WDW EM
SSB 0
LB 1.00 Hz
GB 0
PC 1.40
```

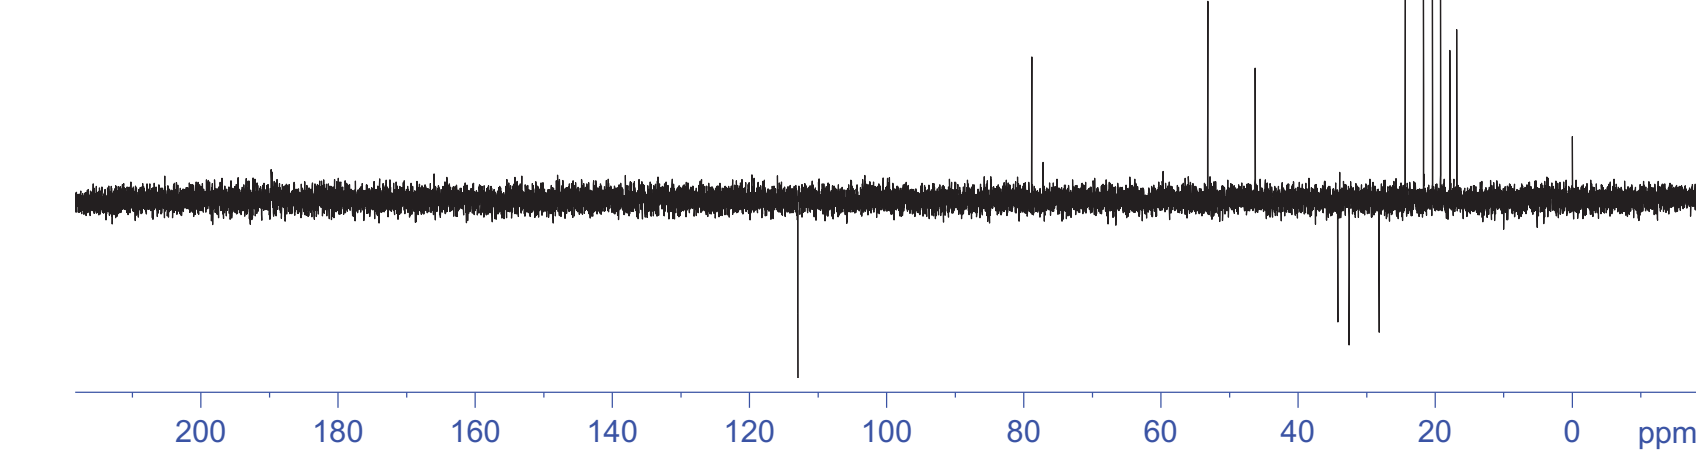

```
NAME 110119
EXPNO 7
PROCNO 1
Date_ 20110119
Time 13.44
INSTRUM spect
PROBHD 5 mm PABBO BB-
PULPROG zgpg30
TD 65536
SOLVENT CDCl3
NS 256
DS 4
SWH 29761.904 Hz
FIDRES 0.454113 Hz
AQ 1.1101048 sec
RG 203
ZW 16.800 usec
DE 6.50 usec
TE 298.0 K
CNST2 145.0000000
D1 2.0000000 sec
D2 0.00344828 sec
D12 0.00002000 sec
TD0 1
----- CHANNEL f1 -----
NUC1 13C
P1 10.04 usec
P2 20.08 usec
PL1 -1.00 dB
PL1W 106.25253296 W
SFO1 125.7703643 MHz
----- CHANNEL f2 -----
CHDPRG2 waltz16
NUC2 1H
P4 13.00 usec
P4 26.00 usec
PCP2 80.00 usec
P2 0.35 dB
PL1 16.90 dB
PL2 0.35 dB
PL12 16.90 dB
PL2W 19.76737595 W
PL1W 0.43747079 W
SFO2 500.1320005 MHz
SI 32768
SF 125.7577890 MHz
WDW EM
SSB 0
LB 1.00 Hz
GB 0
PC 1.40
```

hsqc\_cf42-10

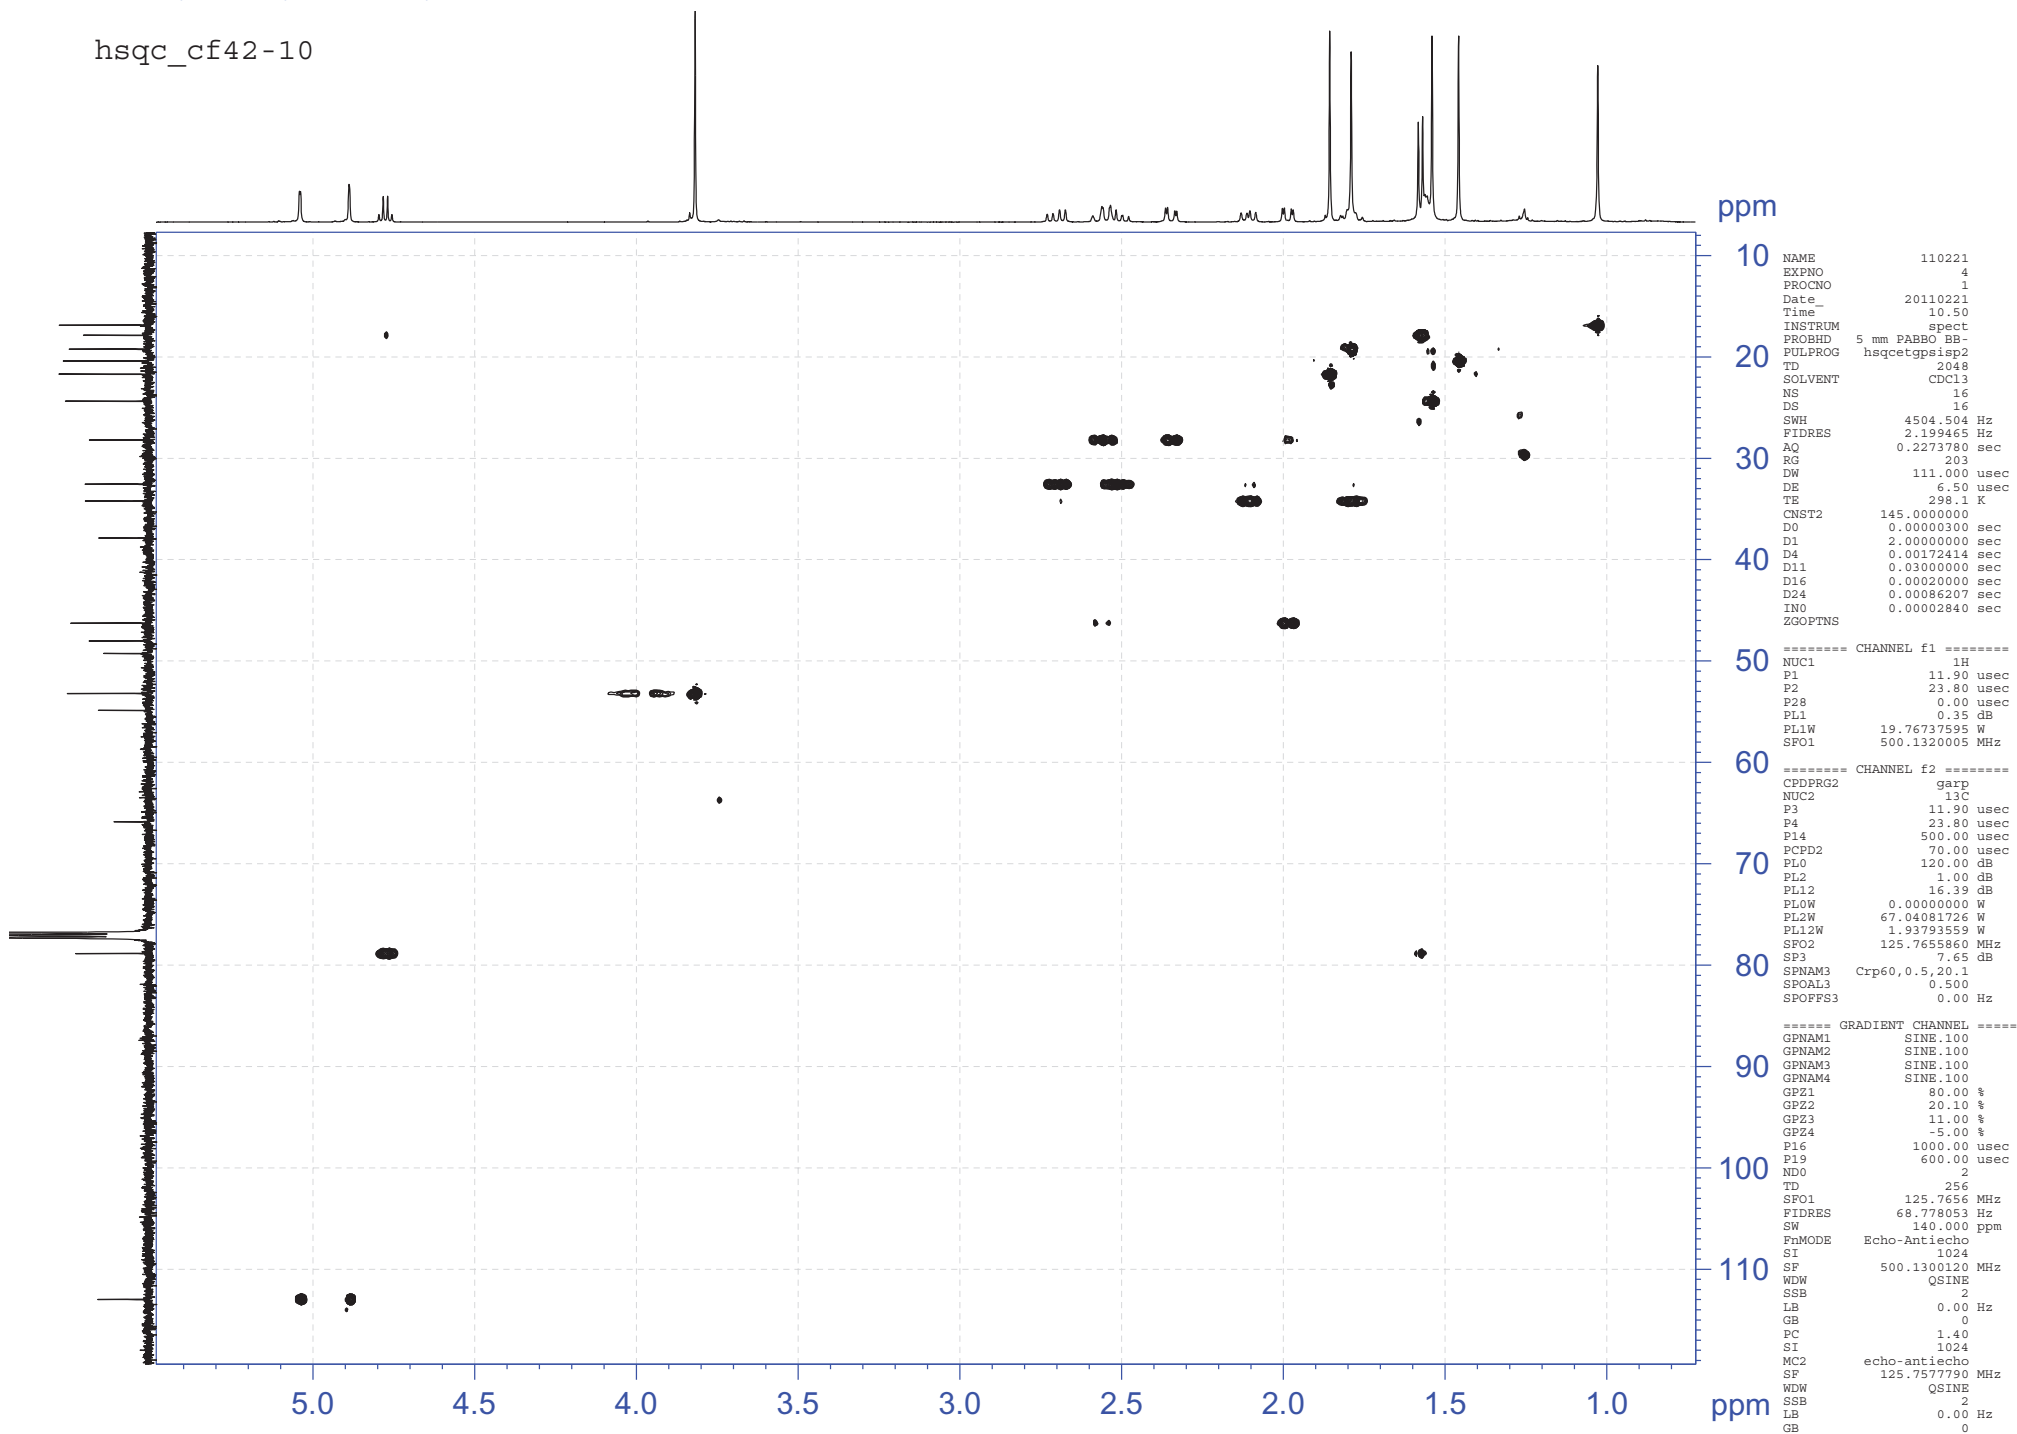

hmbc\_cf42-10

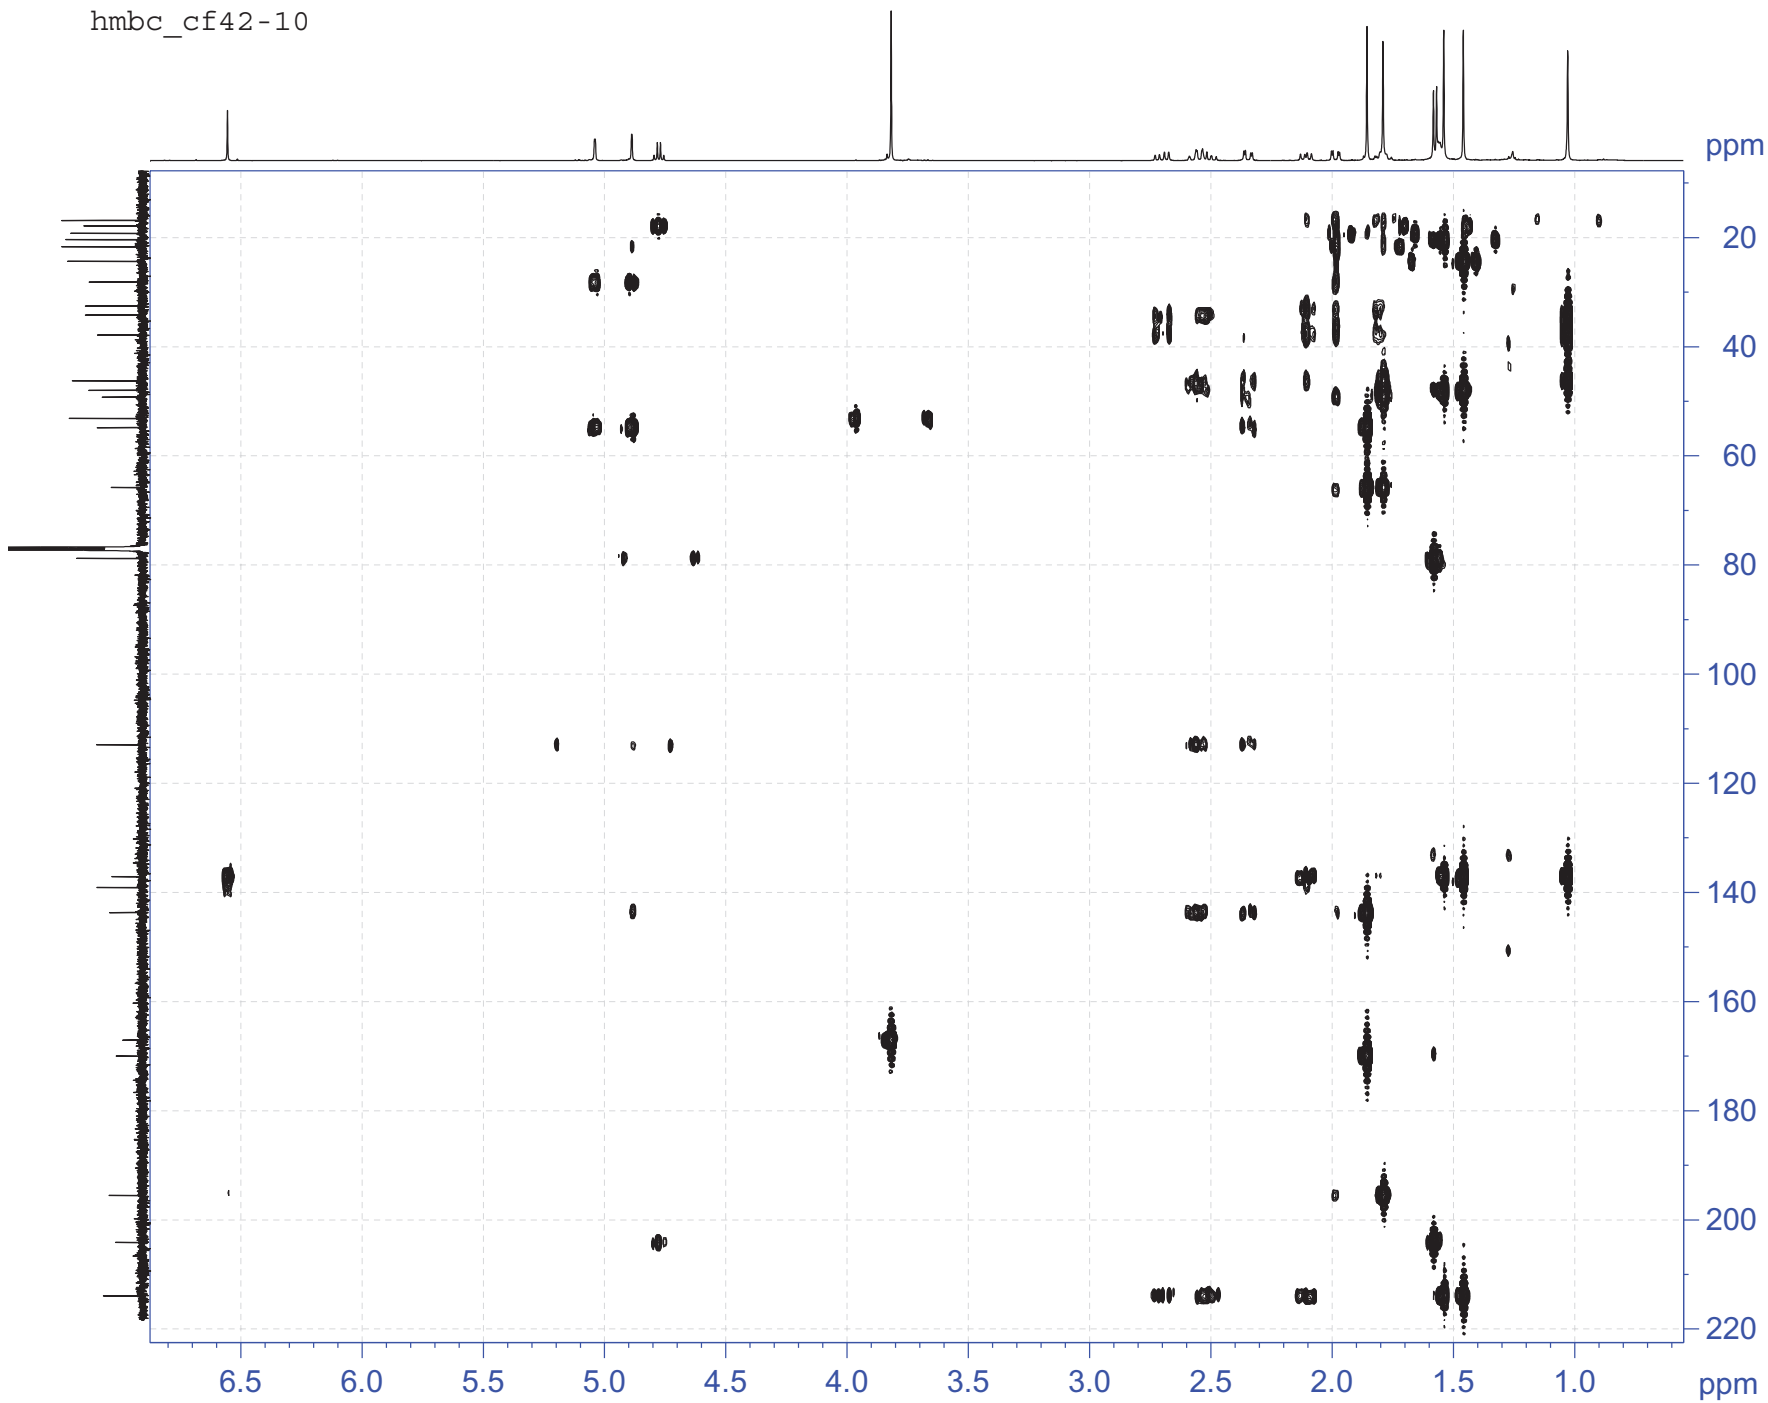

```
NAME 110221
EXPNO 5
PROCNO 1
Date_ 20110221
Time_ 13.25
INSTRUM spect
PROBHD 5 mm PABBO BB-
PULPROG hmbcetgpl2nd
TD 4096
SOLVENT CDCl3
NS 32
DS 16
SWH 4504.504 Hz
FIDRES 1.099733 Hz
AQ 0.4547060 sec
RG 203
DW 111.000 usec
DE 6.50 usec
TE 298.0 K
CNST6 120.0000000
CNST7 180.0000000
CNST13 7.0000000
CNST30 0.5981086
D0 0.00000300 sec
D1 1.50000000 sec
D6 0.07142857 sec
D16 0.00020000 sec
INO 0.00001590 sec

===== CHANNEL f1 =====
NUC1 1H
P1 11.90 usec
P2 23.80 usec
PL1 0.35 dB
PL1W 19.76737595 W
SF01 500.1320005 MHz

===== CHANNEL f2 =====
NUC2 13C
P3 11.90 usec
P24 2000.00 usec
PL2 1.00 dB
PL2W 67.04081726 W
SF02 125.7728799 MHz
SP7 7.65 dB
SPNAM7 Crp60comp.4
SPOAL7 0.500
SPOFFS7 0.00 Hz

===== GRADIENT CHANNEL =====
GPNAM1 SINE.100
GPNAM3 SINE.100
GPNAM4 SINE.100
GPNAM5 SINE.100
GPZ1 80.00 %
GPZ3 15.00 %
GPZ4 -10.00 %
GPZ5 -5.00 %
P16 1000.00 usec
ND0 2
TD 256
SF01 125.7729 MHz
FIDRES 122.825081 Hz
SW 250.000 ppm
FMODE Echo-Antiecho
SI 1024
SF 500.1300120 MHz
WDW SINE
SSB 0
LB 0.00 Hz
GB 0
PC 1.40
SI 1024
MC2 echo-antiecho
SF 125.7577790 MHz
WDW SINE
SSB 0
LB 0.00 Hz
GB 0
```

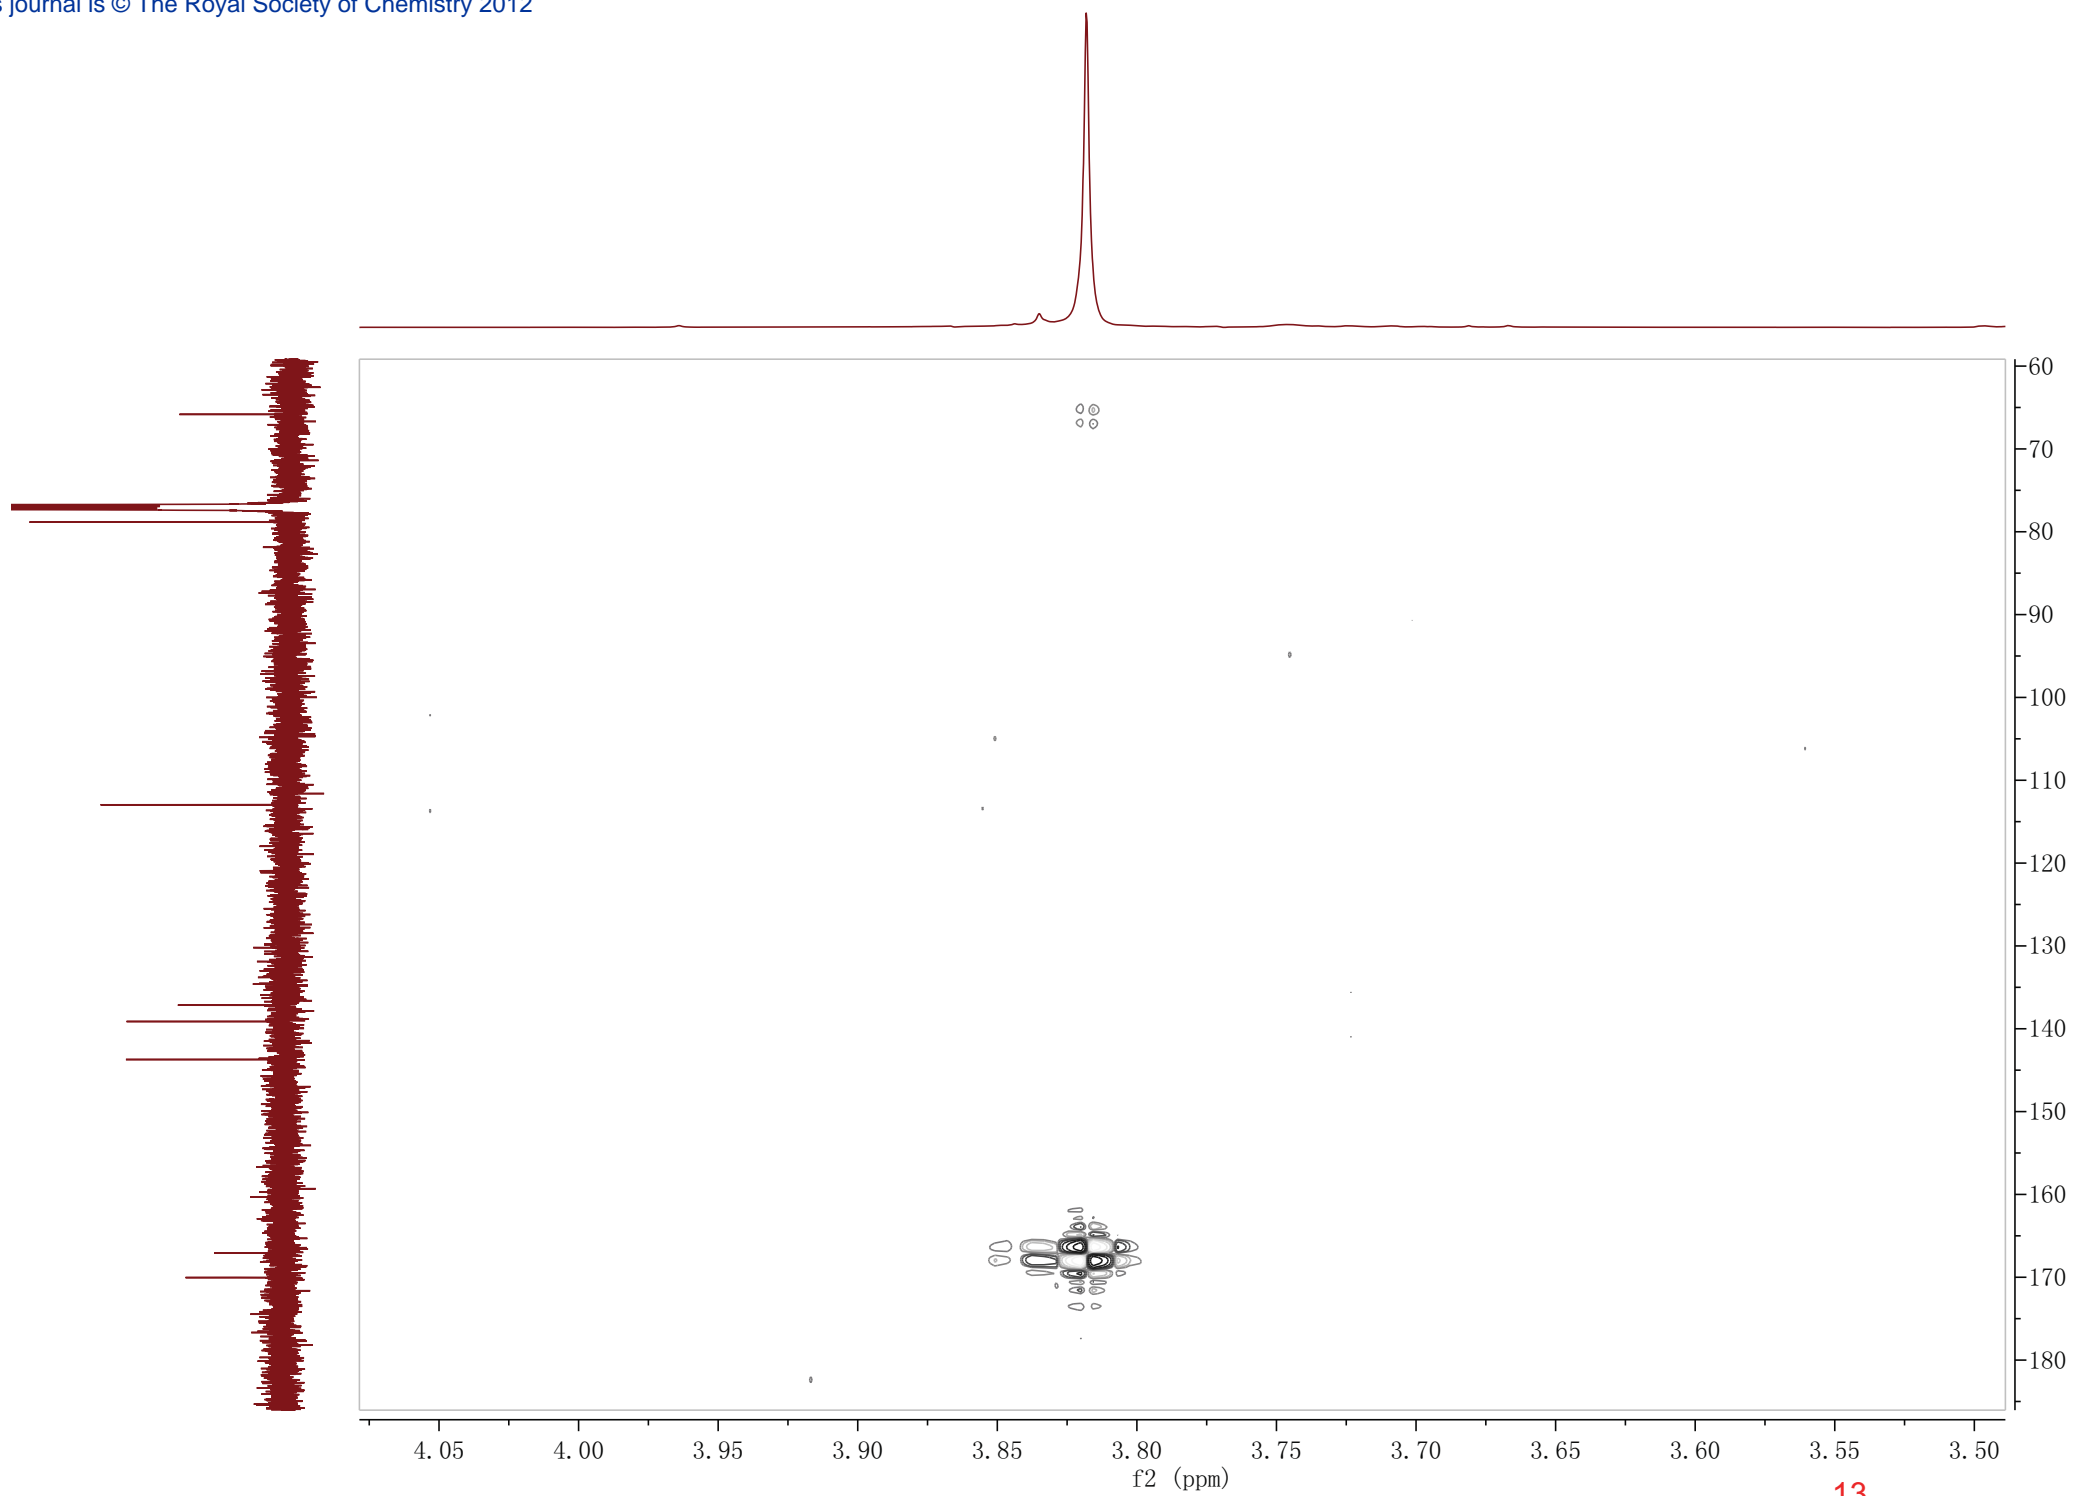

cosy\_cf42-10

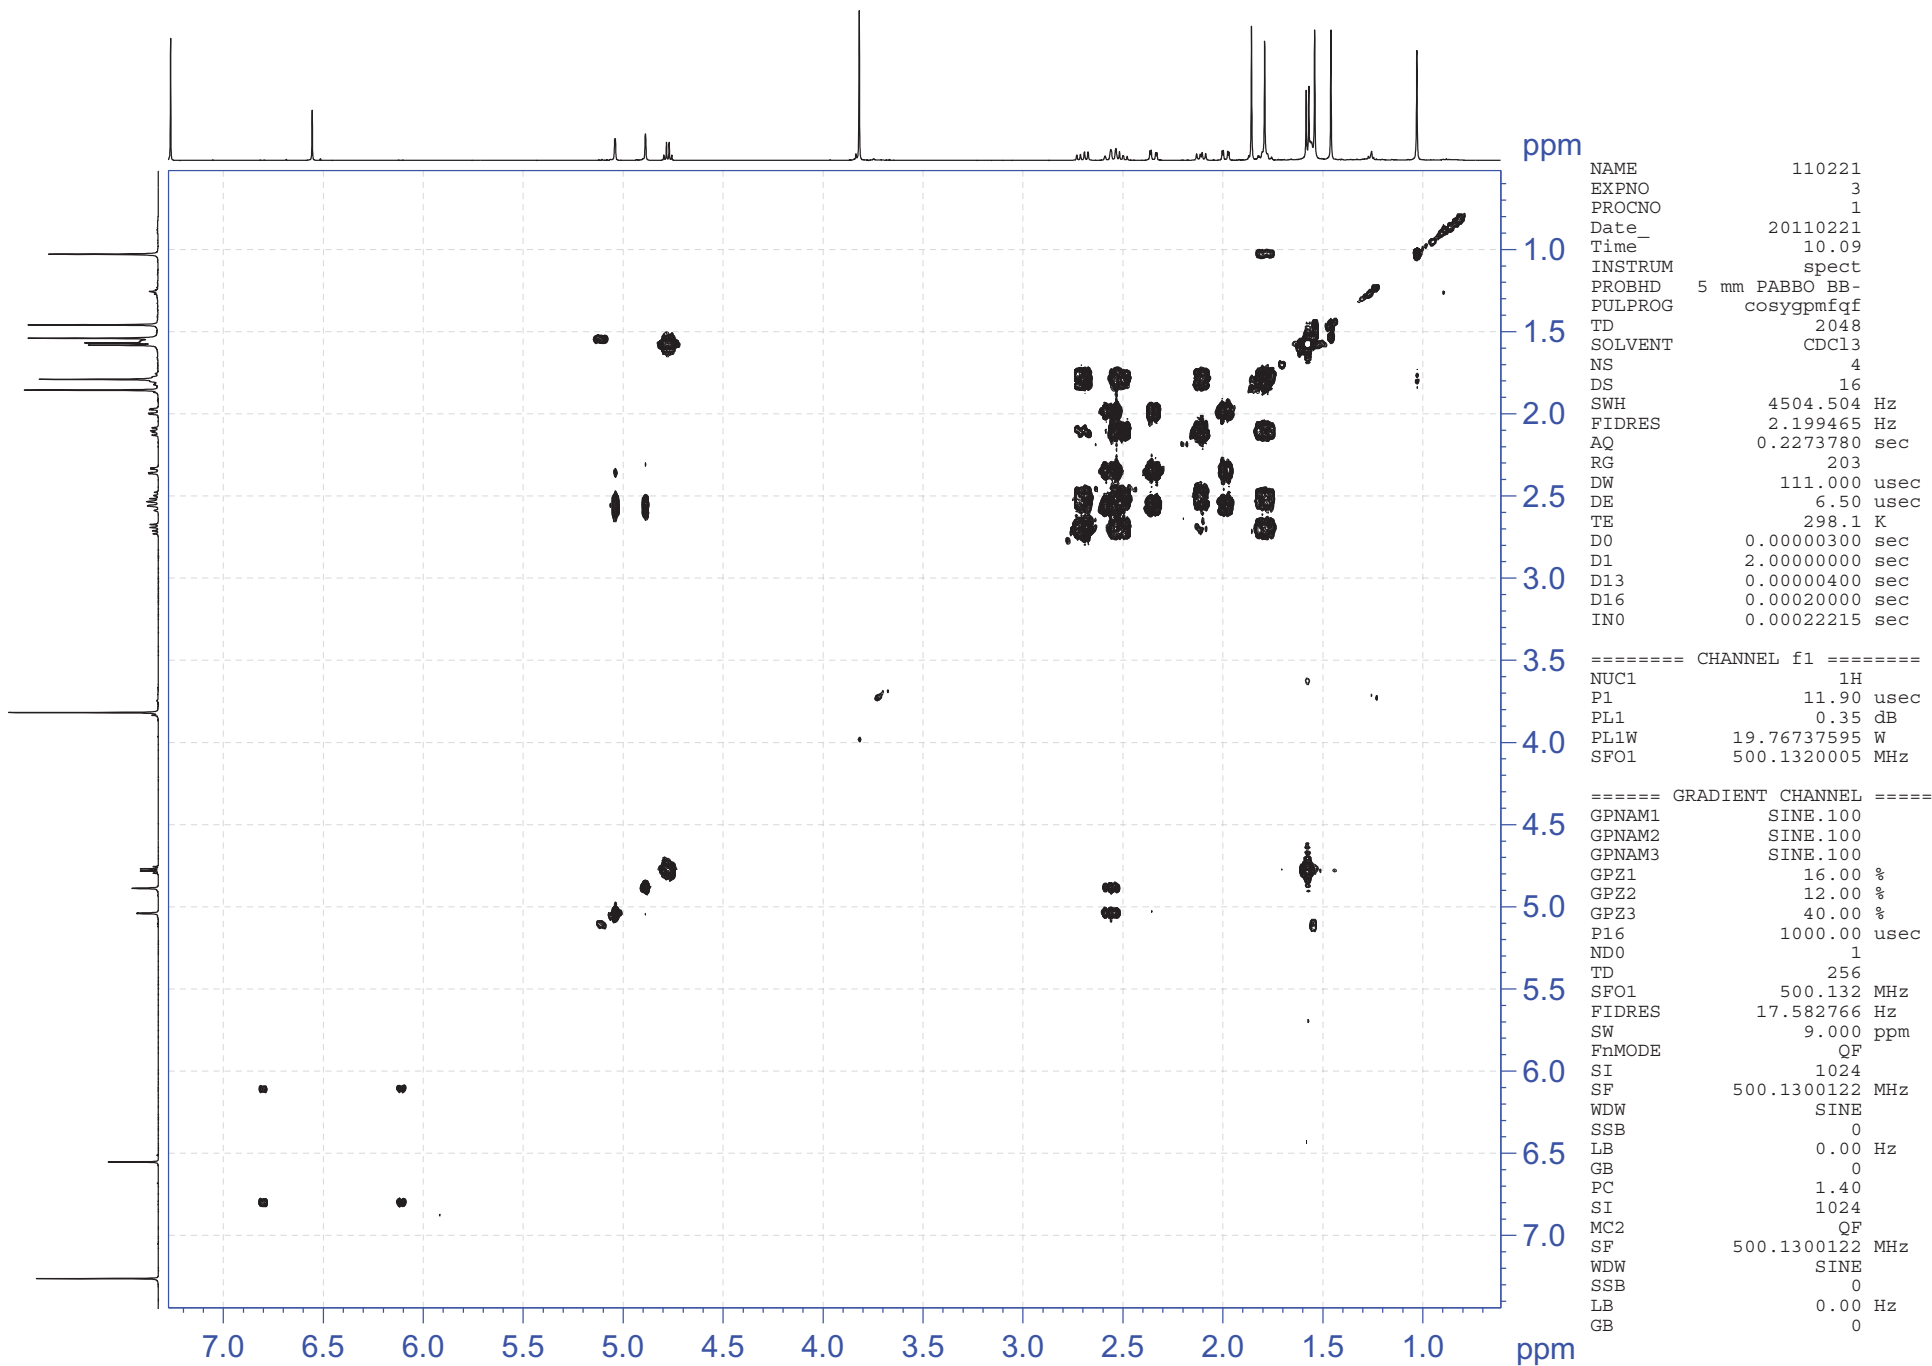

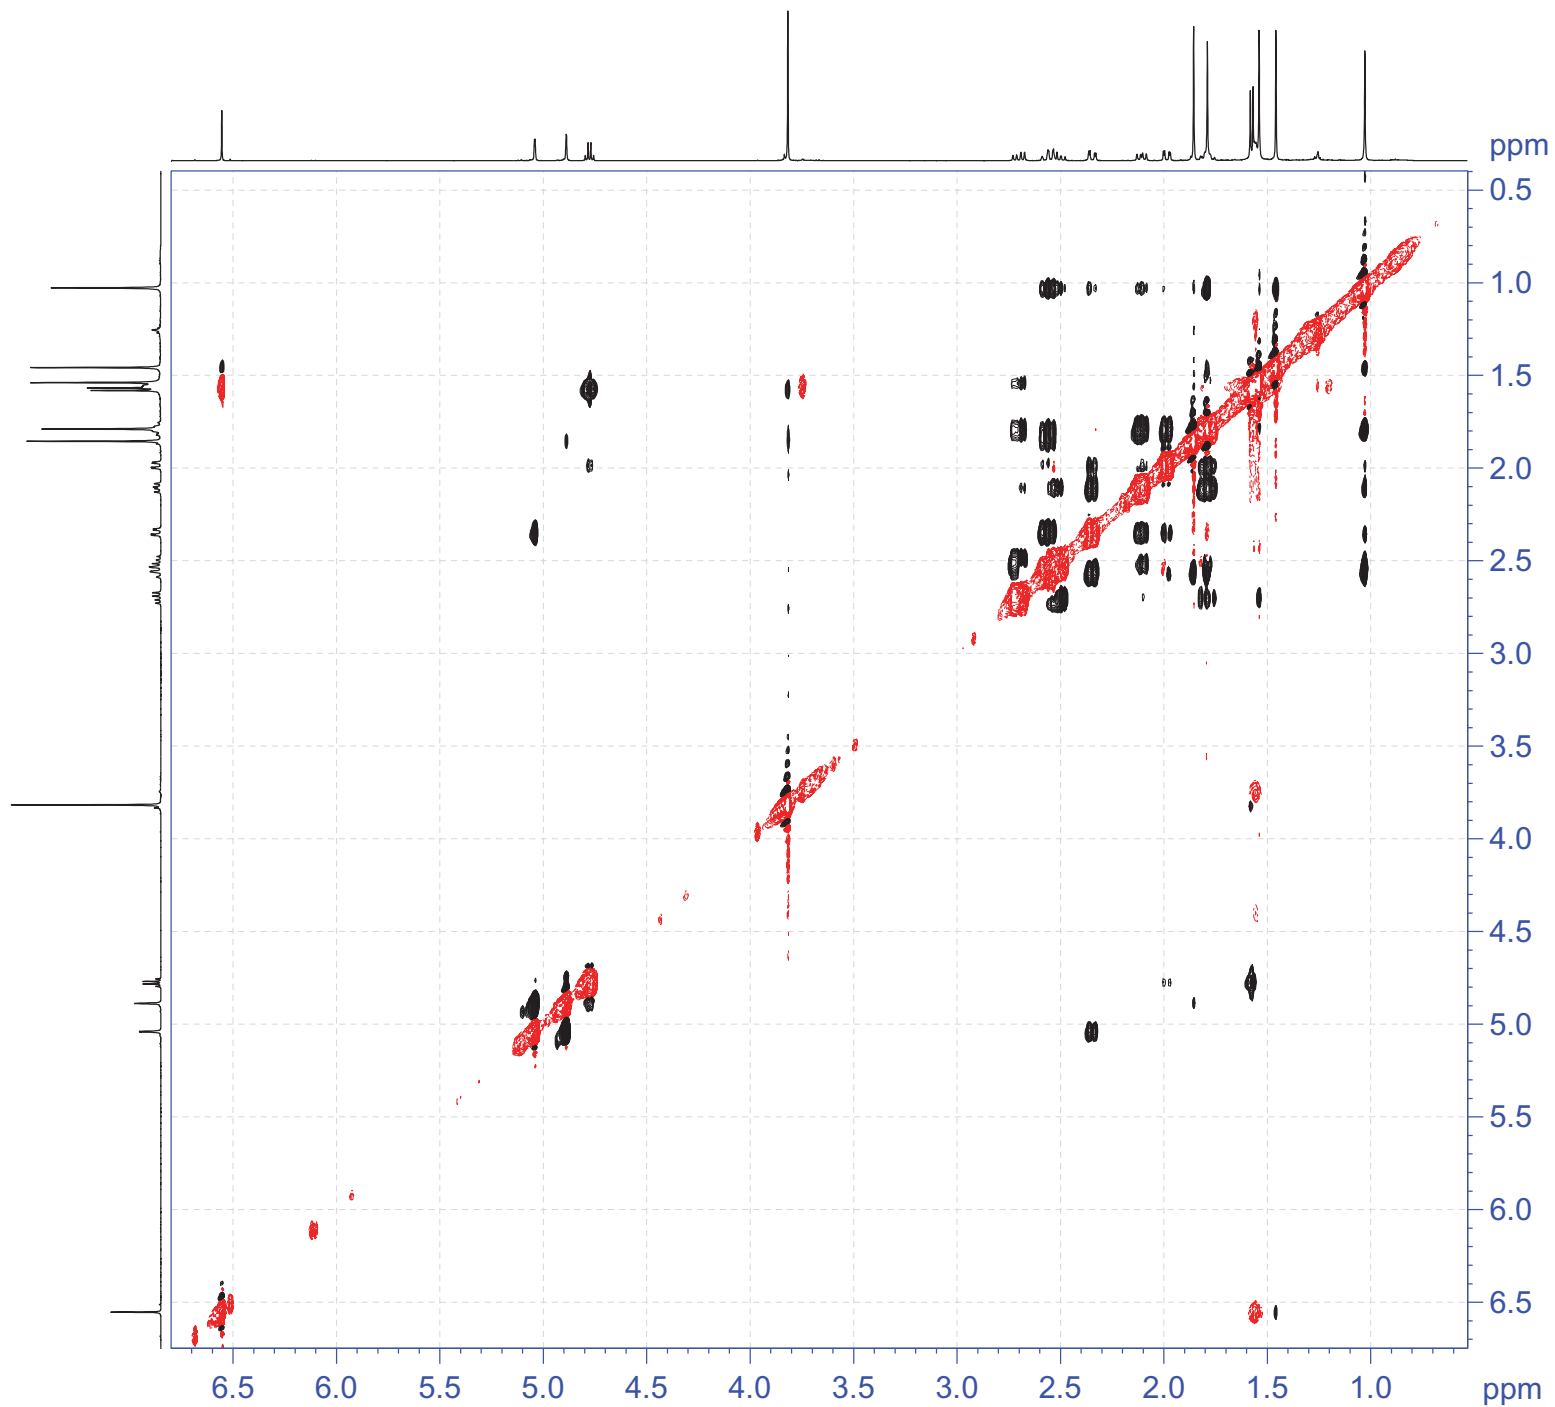

NAME 110221  
EXPNO 6  
PROCNO 1  
Date\_ 20110221  
Time 18.04  
INSTRUM spect  
PROBHD 5 mm PABBO BB-  
PULPROG noesyggpph  
TD 2048  
SOLVENT CDCl3  
NS 8  
DS 16  
SWH 4504.504 Hz  
FIDRES 2.199465 Hz  
AQ 0.2273780 sec  
RG 203  
DW 111.000 usec  
DE 6.50 usec  
TE 298.0 K  
D0 0.00009593 sec  
D1 2.00000000 sec  
D8 0.69999999 sec  
D16 0.00020000 sec  
INO 0.00022215 sec

===== CHANNEL f1 =====  
NUC1 1H  
P1 11.90 usec  
P2 23.80 usec  
PL1 0.35 dB  
PL1W 19.76737595 W  
SFO1 500.1320005 MHz

===== GRADIENT CHANNEL =====  
GPNAM1 SINE.100  
GPNAM2 SINE.100  
GPZ1 40.00 %  
GPZ2 -40.00 %  
P16 1000.00 usec  
NDO 1  
TD 256  
SFO1 500.132 MHz  
FIDRES 17.582766 Hz  
SW 9.000 ppm  
FnMODE States-TPPI  
SI 1024  
SF 500.1300120 MHz  
WDW QSINE  
SSB 2  
LB 0.00 Hz  
GB 0  
PC 1.00  
SI 1024  
MC2 States-TPPI  
SF 500.1300120 MHz  
WDW QSINE  
SSB 2  
LB 0.00 Hz  
GB 0

## Elemental Composition Report

## Single Mass Analysis (displaying only valid results)

Tolerance = 10.0 PPM / DBE: min = 0.5, max = 40.0

Selected filters: None

Monoisotopic Mass, Odd and Even Electron Ions

51 formula(e) evaluated with 1 results within limits (up to 51 closest results for each mass)

Elements Used:

C: 0-200 H: 0-400 O: 0-8

cf42-10

12:22:48 14-Mar-2011

Voltage EI+

100

%

0

0

0

0

0

0

0

0

0

0

0

0

0

0

0

0

0

0

0

0

0

0

0

0

0

0

0

0

0

0

0

0

0

0

0

0

0

0

0

0

0

0

0

0

0

0

0

0

0

0

0

0

0

0

0

0

0

0

0

0

0

0

0

Minimum:

Maximum:

100.0

10.0

0.5

40.0

| Mass     | Calc. Mass | mDa  | PPM  | DBE  | i-FIT     | Formula    |
|----------|------------|------|------|------|-----------|------------|
| 472.2093 | 472.2097   | -0.4 | -0.8 | 11.0 | 5546478.0 | C26 H32 O8 |

471.9714

472.0535

KIB  
M110314EA-01AFAMM 13 (1.193)

472.2093

Autospec Premier  
P776  
924



cf42-46

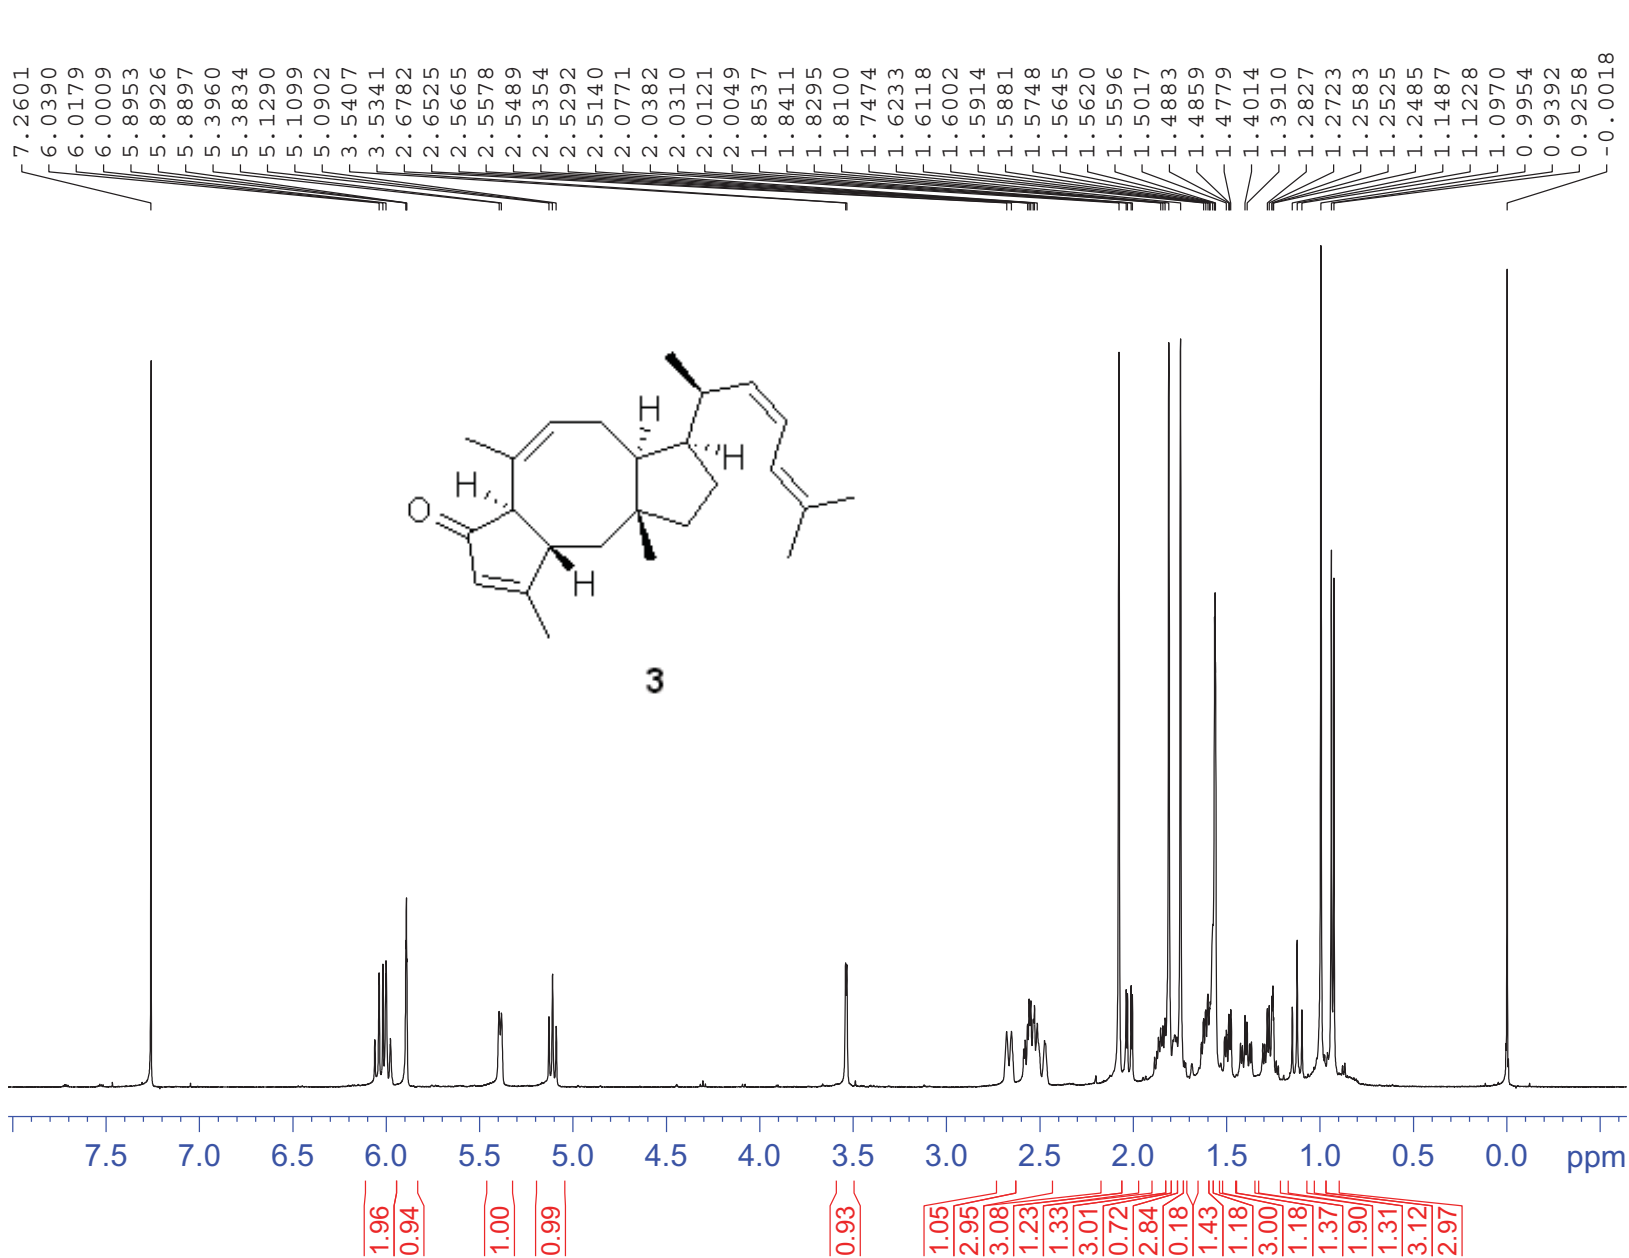

NAME 110524  
EXPNO 3  
PROCNO 1  
Date\_ 20110524  
Time\_ 10.15  
INSTRUM spect  
PROBHD 5 mm PABBO BB-  
PULPROG zg30  
TD 65536  
SOLVENT CDCl3  
NS 8  
DS 0  
SWH 10330.578 Hz  
FIDRES 0.157632 Hz  
AQ 3.1719923 sec  
RG 144  
DW 48.400 usec  
DE 6.50 usec  
TE 298.0 K  
D1 1.00000000 sec  
TD0 1

==== CHANNEL f1 =====  
NUC1 1H  
P1 11.90 usec  
PL1 0.35 dB  
PL1W 19.76737595 W  
SFO1 500.1330885 MHz  
SI 32768  
SF 500.1300133 MHz  
WDW EM  
SSB 0  
LB 0.30 Hz  
GB 0  
PC 1.00

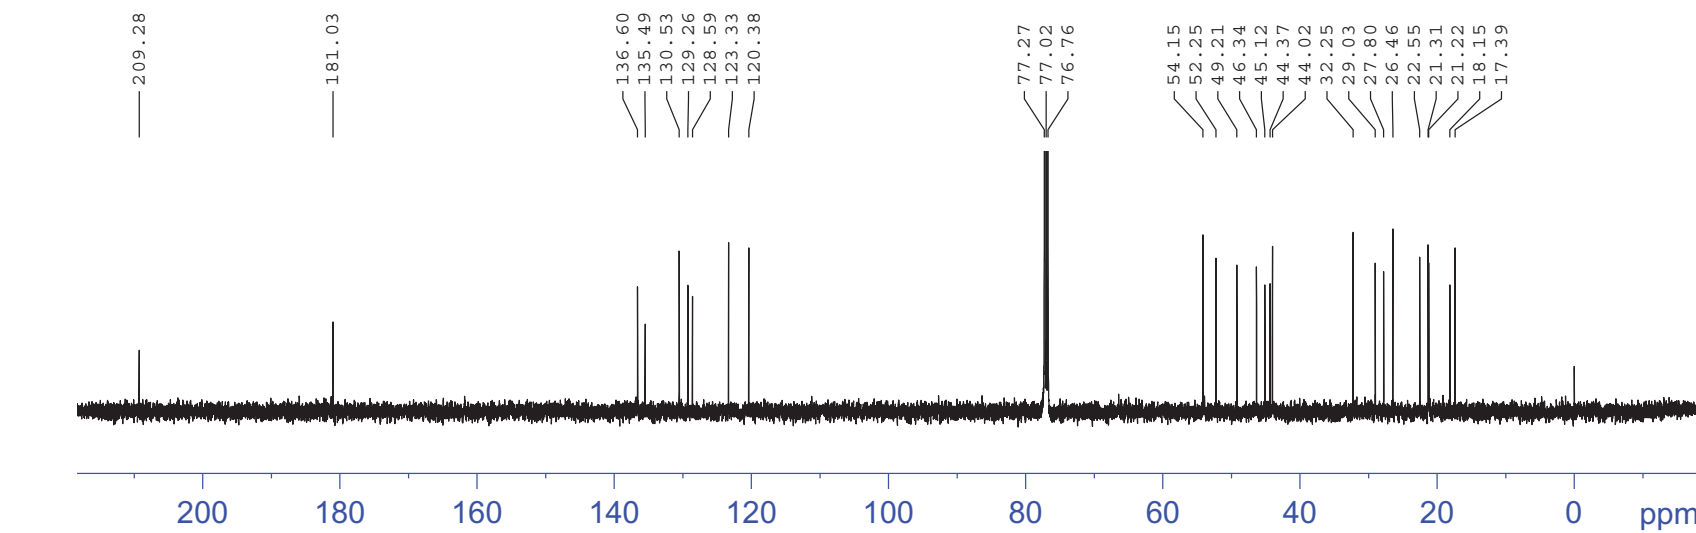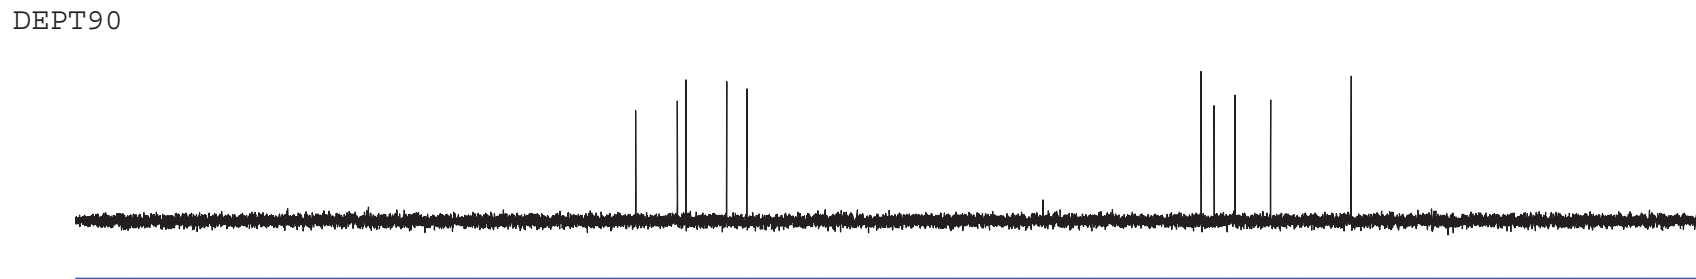

```
NAME 110526
EXPNO 11
PROCNO 1
Date_ 20110531
Time 10.51
INSTRUM spect
PROBHD 5 mm PABBO BB-
PULPROG zgpg30
TD 65536
SOLVENT CDCl3
NS 4
DS 4
SWH 29761.904 Hz
FIDRES 0.454113 Hz
AQ 1.1010548 sec
RG 203
DE 16.800 usec
DE 6.50 usec
TE 298.0 K
D1 2.0000000 sec
D11 0.0300000 sec
TD0 1
----- CHANNEL f1 -----
NUC1 13C
P1 10.04 usec
PL1 -1.00 dB
PL1W 106.25253296 W
SFO1 125.7703643 MHz
----- CHANNEL f2 -----
CHDPRG2 waltz16
NUC2 1H
PCPD2 80.00 usec
PL2 0.35 dB
PL1 16.90 dB
PL12 17.00 dB
PL2W 19.76737595 W
PL1W 0.43747079 W
PL13W 0.42751271 W
SFO2 500.1320005 MHz
SI 32768
SF 125.7577890 MHz
WDW EM
SSB 0
LB 1.00 Hz
GB 0
PC 1.40
----- CHANNEL f1 -----
NAME 110526
EXPNO 11
PROCNO 1
Date_ 20110531
Time 11.23
INSTRUM spect
PROBHD 5 mm PABBO BB-
PULPROG zgpg30
TD 65536
SOLVENT CDCl3
NS 4
DS 4
SWH 29761.904 Hz
FIDRES 0.454113 Hz
AQ 1.1010548 sec
RG 203
DE 16.800 usec
DE 6.50 usec
TE 298.0 K
CNST2 145.0000000
D1 2.0000000 sec
D2 0.00344828 sec
D12 0.00002000 sec
TD0 1
----- CHANNEL f1 -----
NUC1 13C
P1 10.04 usec
P2 20.08 usec
PL1 -1.00 dB
PL2 20.08 usec
PL1W 106.25253296 W
SFO1 125.7703643 MHz
----- CHANNEL f2 -----
CHDPRG2 waltz16
NUC2 1H
P3 13.00 usec
P4 26.00 usec
PCPD2 80.00 usec
PL2 0.35 dB
PL12 16.90 dB
PL2W 19.76737595 W
PL1W 0.43747079 W
SFO2 500.1320005 MHz
SI 32768
SF 125.7577890 MHz
WDW EM
SSB 0
LB 1.00 Hz
GB 0
PC 1.40
----- CHANNEL f1 -----
NAME 110526
EXPNO 12
PROCNO 1
Date_ 20110531
Time 11.16
INSTRUM spect
PROBHD 5 mm PABBO BB-
PULPROG zgpg30
TD 65536
SOLVENT CDCl3
NS 4
DS 4
SWH 29761.904 Hz
FIDRES 0.454113 Hz
AQ 1.1010548 sec
RG 203
DE 16.800 usec
DE 6.50 usec
TE 298.0 K
CNST2 145.0000000
D1 2.0000000 sec
D2 0.00344828 sec
D12 0.00002000 sec
TD0 1
----- CHANNEL f1 -----
NUC1 13C
P1 10.04 usec
P2 20.08 usec
PL1 -1.00 dB
PL2 20.08 usec
PL1W 106.25253296 W
SFO1 125.7703643 MHz
----- CHANNEL f2 -----
CHDPRG2 waltz16
NUC2 1H
P3 13.00 usec
P4 26.00 usec
PCPD2 80.00 usec
PL2 0.35 dB
PL12 16.90 dB
PL2W 19.76737595 W
PL1W 0.43747079 W
SFO2 500.1320005 MHz
SI 32768
SF 125.7577890 MHz
WDW EM
SSB 0
LB 1.00 Hz
GB 0
PC 1.40
```

hsqc\_cf42-46

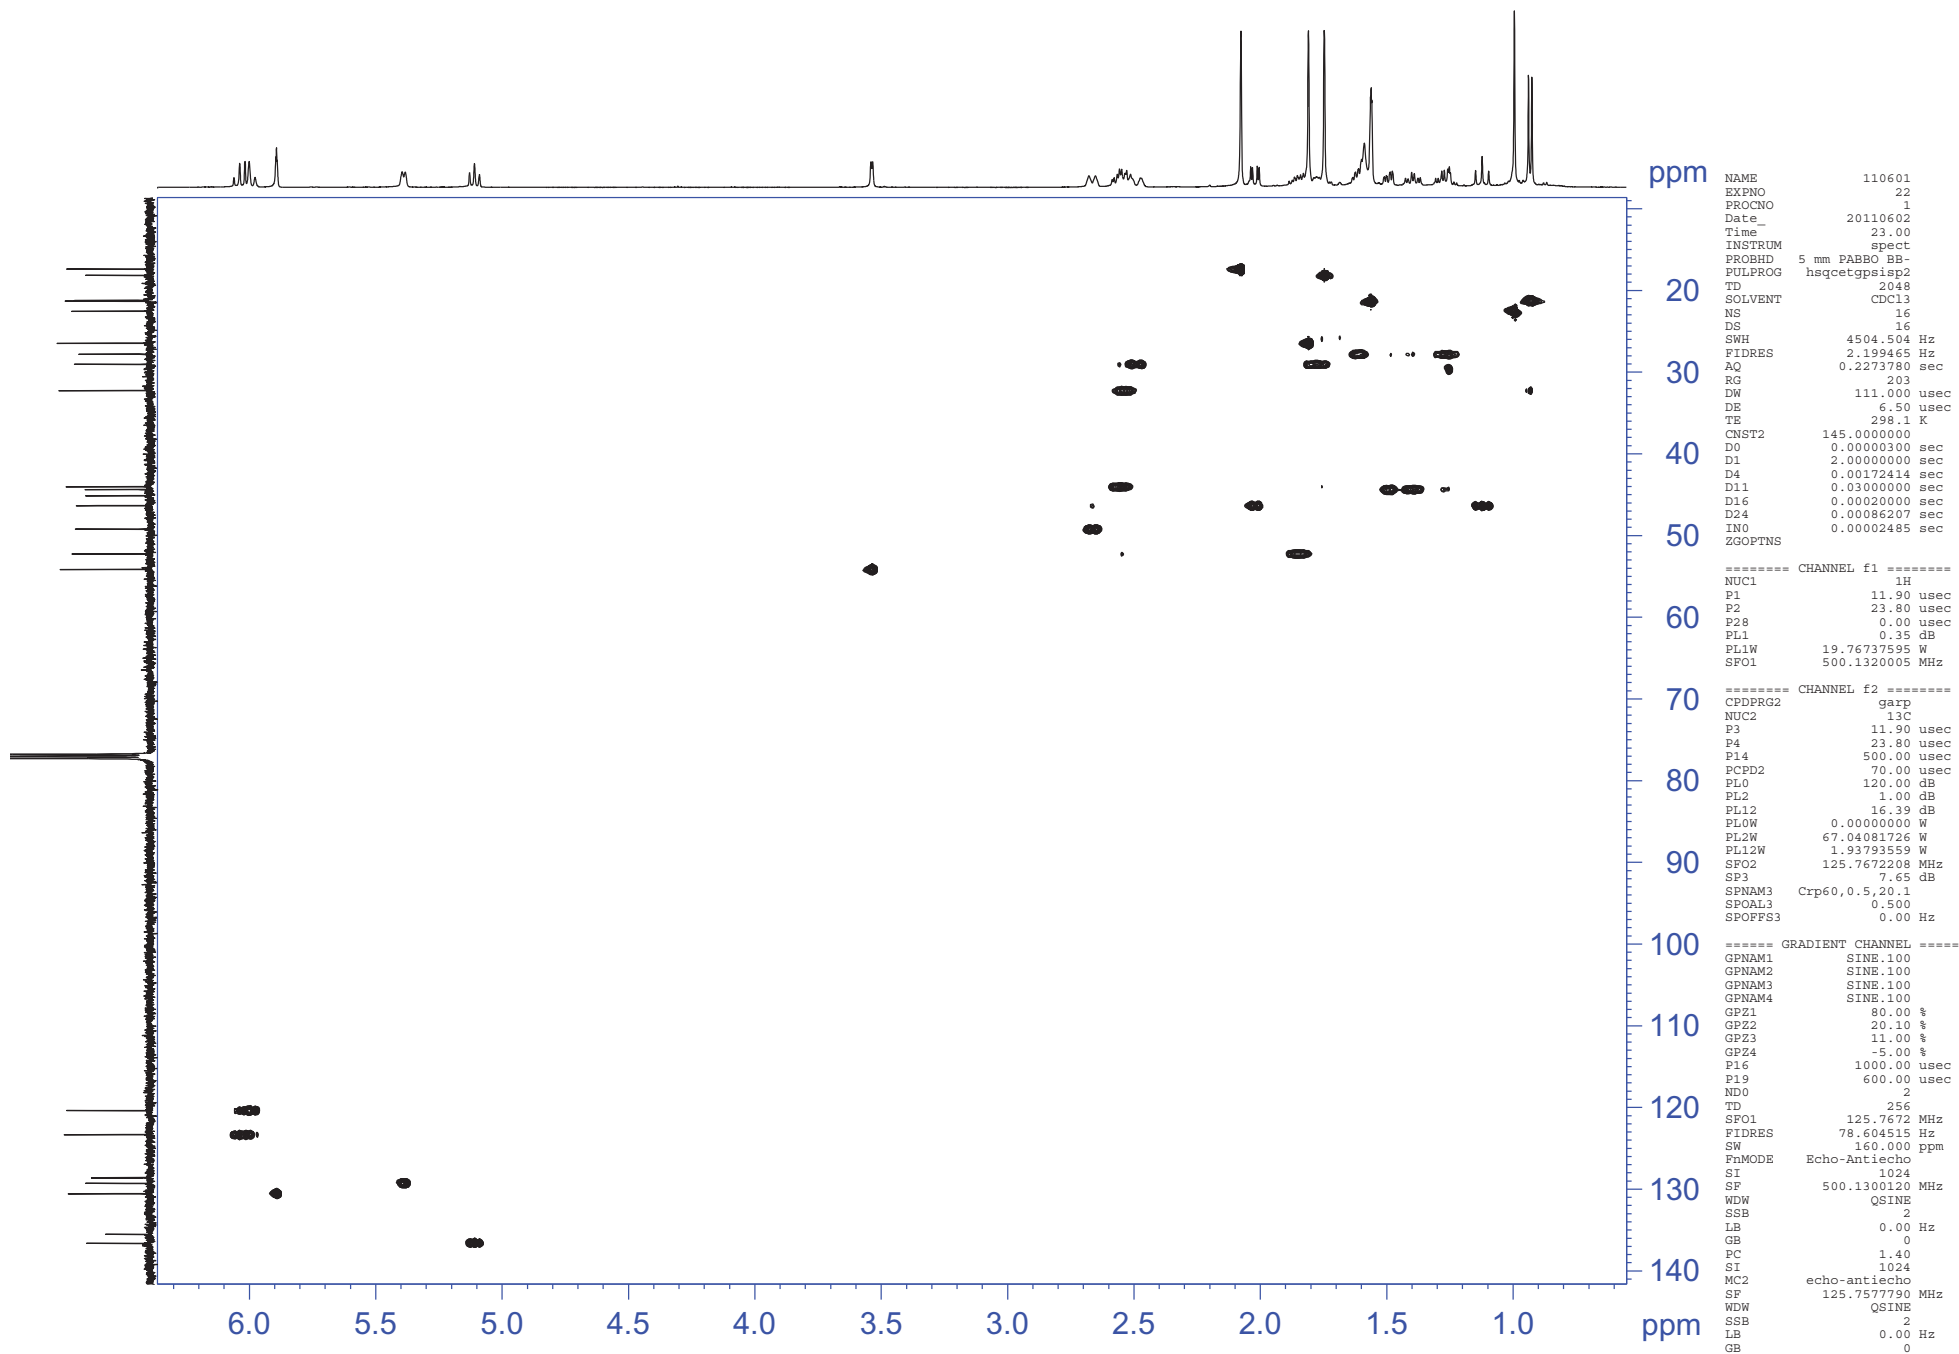

hmbc\_cf42-46

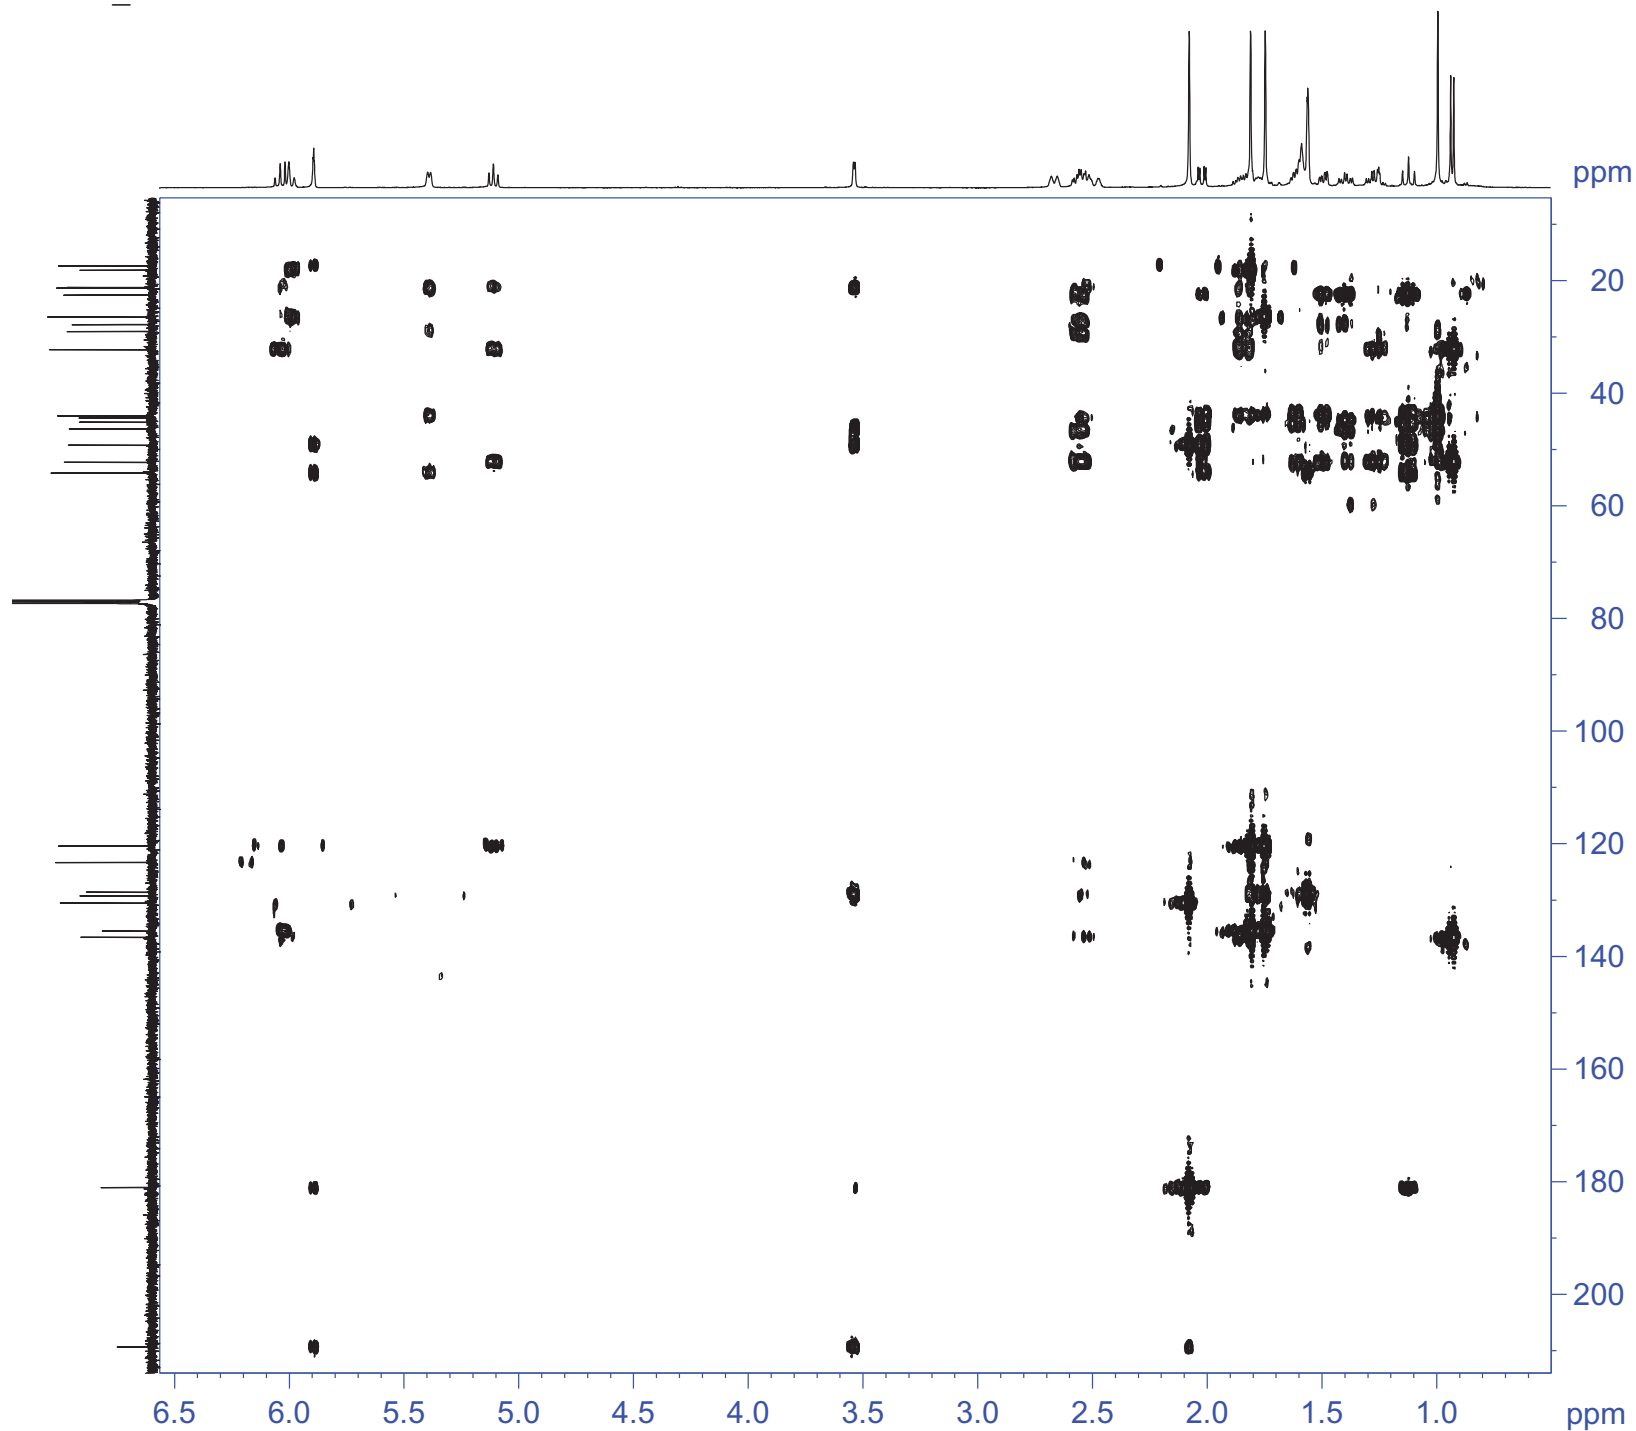

```
NAME 110601
EXPNO 23
PROCNO 1
Date_ 20110603
Time 1.35
INSTRUM spect
PROBHD 5 mm PABBO BB-
PULPROG hmbcetgp12nd
TD 4096
SOLVENT CDCl3
NS 32
DS 16
SWH 4504.504 Hz
FIDRES 1.099733 Hz
AQ 0.4547060 sec
RG 203
DW 111.000 usec
DE 6.50 usec
TE 298.0 K
CNST6 120.0000000
CNST7 180.0000000
CNST13 7.0000000
CNST30 0.5981119
D0 0.0000300 sec
D1 1.5000000 sec
D6 0.07142857 sec
D16 0.0002000 sec
IN0 0.00001730 sec

===== CHANNEL f1 =====
NUC1 1H
P1 11.90 usec
P2 23.80 usec
PL1 0.35 dB
PL1W 19.76737595 W
SFO1 500.1320005 MHz

===== CHANNEL f2 =====
NUC2 13C
P3 11.90 usec
P24 2000.00 usec
PL2 1.00 dB
PL2W 67.04081726 W
SFO2 125.7716224 MHz
SP7 7.65 dB
SPNAM7 Crp60comp.4
SPOAL7 0.500
SPOFFS7 0.00 Hz

===== GRADIENT CHANNEL =====
GPNAM1 SINE.100
GPNAM3 SINE.100
GPNAM4 SINE.100
GPNAM5 SINE.100
GPZ1 80.00 %
GPZ3 15.00 %
GPZ4 -10.00 %
GPZ5 -5.00 %
P16 1000.00 usec
ND0 2
TD 256
SFO1 125.7716 MHz
FIDRES 112.997940 Hz
SW 230.000 ppm
FnMODE Echo-Antiecho
SI 1024
SF 500.1300120 MHz
WDW SINE
SSB 0
LB 0.00 Hz
GB 0
PC 1.40
SI 1024
MC2 echo-antiecho
SF 125.7577790 MHz
WDW SINE
SSB 0
LB 0.00 Hz
GB 0
```

cosy\_cf42-46

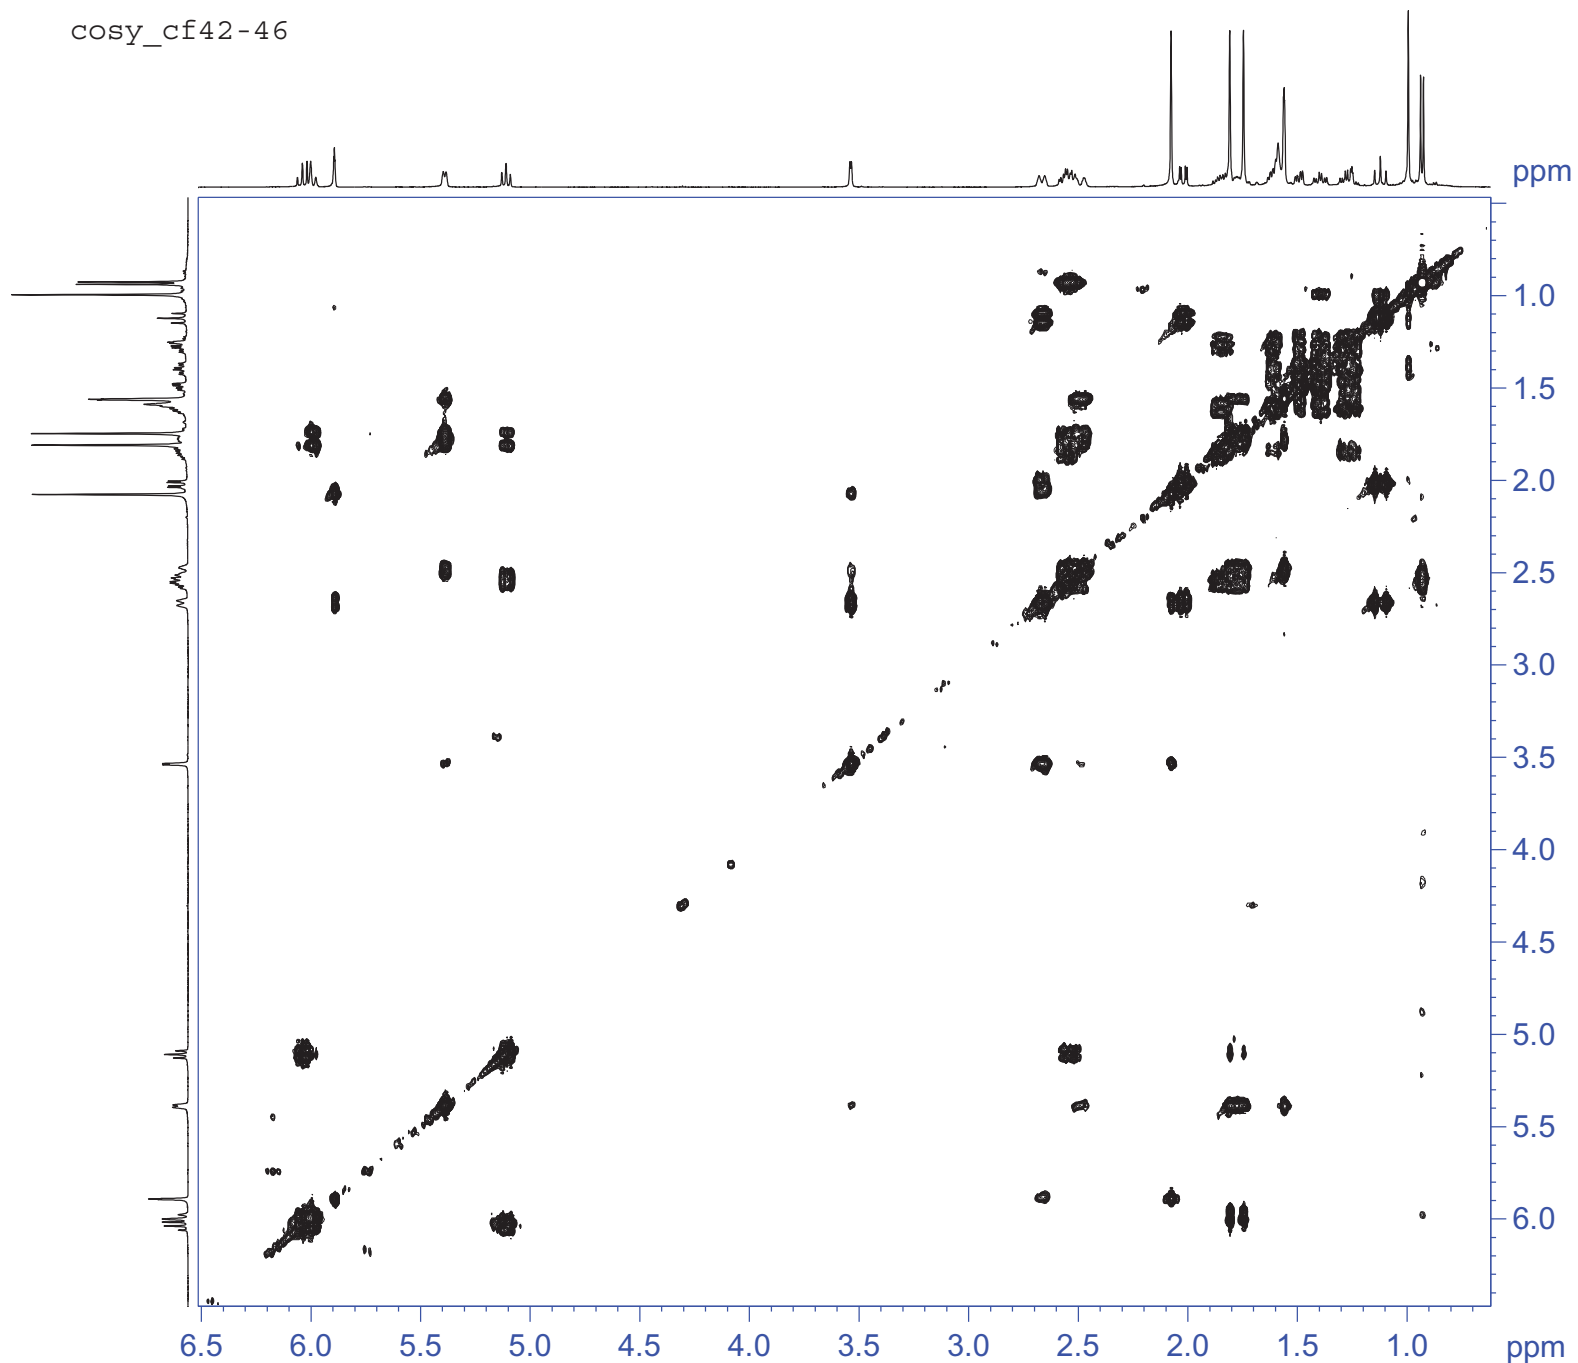

```
NAME 110601
EXPNO 21
PROCNO 1
Date_ 20110602
Time 22.20
INSTRUM spect
PROBHD 5 mm PABBO BB-
PULPROG cosygpmfqc
TD 2048
SOLVENT CDCl3
NS 4
DS 16
SWH 4504.504 Hz
FIDRES 2.199465 Hz
AQ 0.2273780 sec
RG 203
DW 111.000 usec
DE 6.50 usec
TE 298.0 K
D0 0.00000300 sec
D1 2.00000000 sec
D13 0.00000400 sec
D16 0.00020000 sec
IN0 0.00022215 sec

===== CHANNEL f1 =====
NUC1 1H
P1 11.90 usec
PL1 0.35 dB
PL1W 19.76737595 W
SFO1 500.1320005 MHz

===== GRADIENT CHANNEL =====
GPNAM1 SINE.100
GPNAM2 SINE.100
GPNAM3 SINE.100
GPZ1 16.00 %
GPZ2 12.00 %
GPZ3 40.00 %
P16 1000.00 usec
ND0 1
TD 256
SFO1 500.132 MHz
FIDRES 17.582766 Hz
SW 9.000 ppm
FnMODE QF
SI 1024
SF 500.1300129 MHz
WDW SINE
SSB 0
LB 0.00 Hz
GB 0
PC 1.40
SI 1024
MC2 QF
SF 500.1300129 MHz
WDW SINE
SSB 0
LB 0.00 Hz
GB 0
```

noesy\_cf42-46

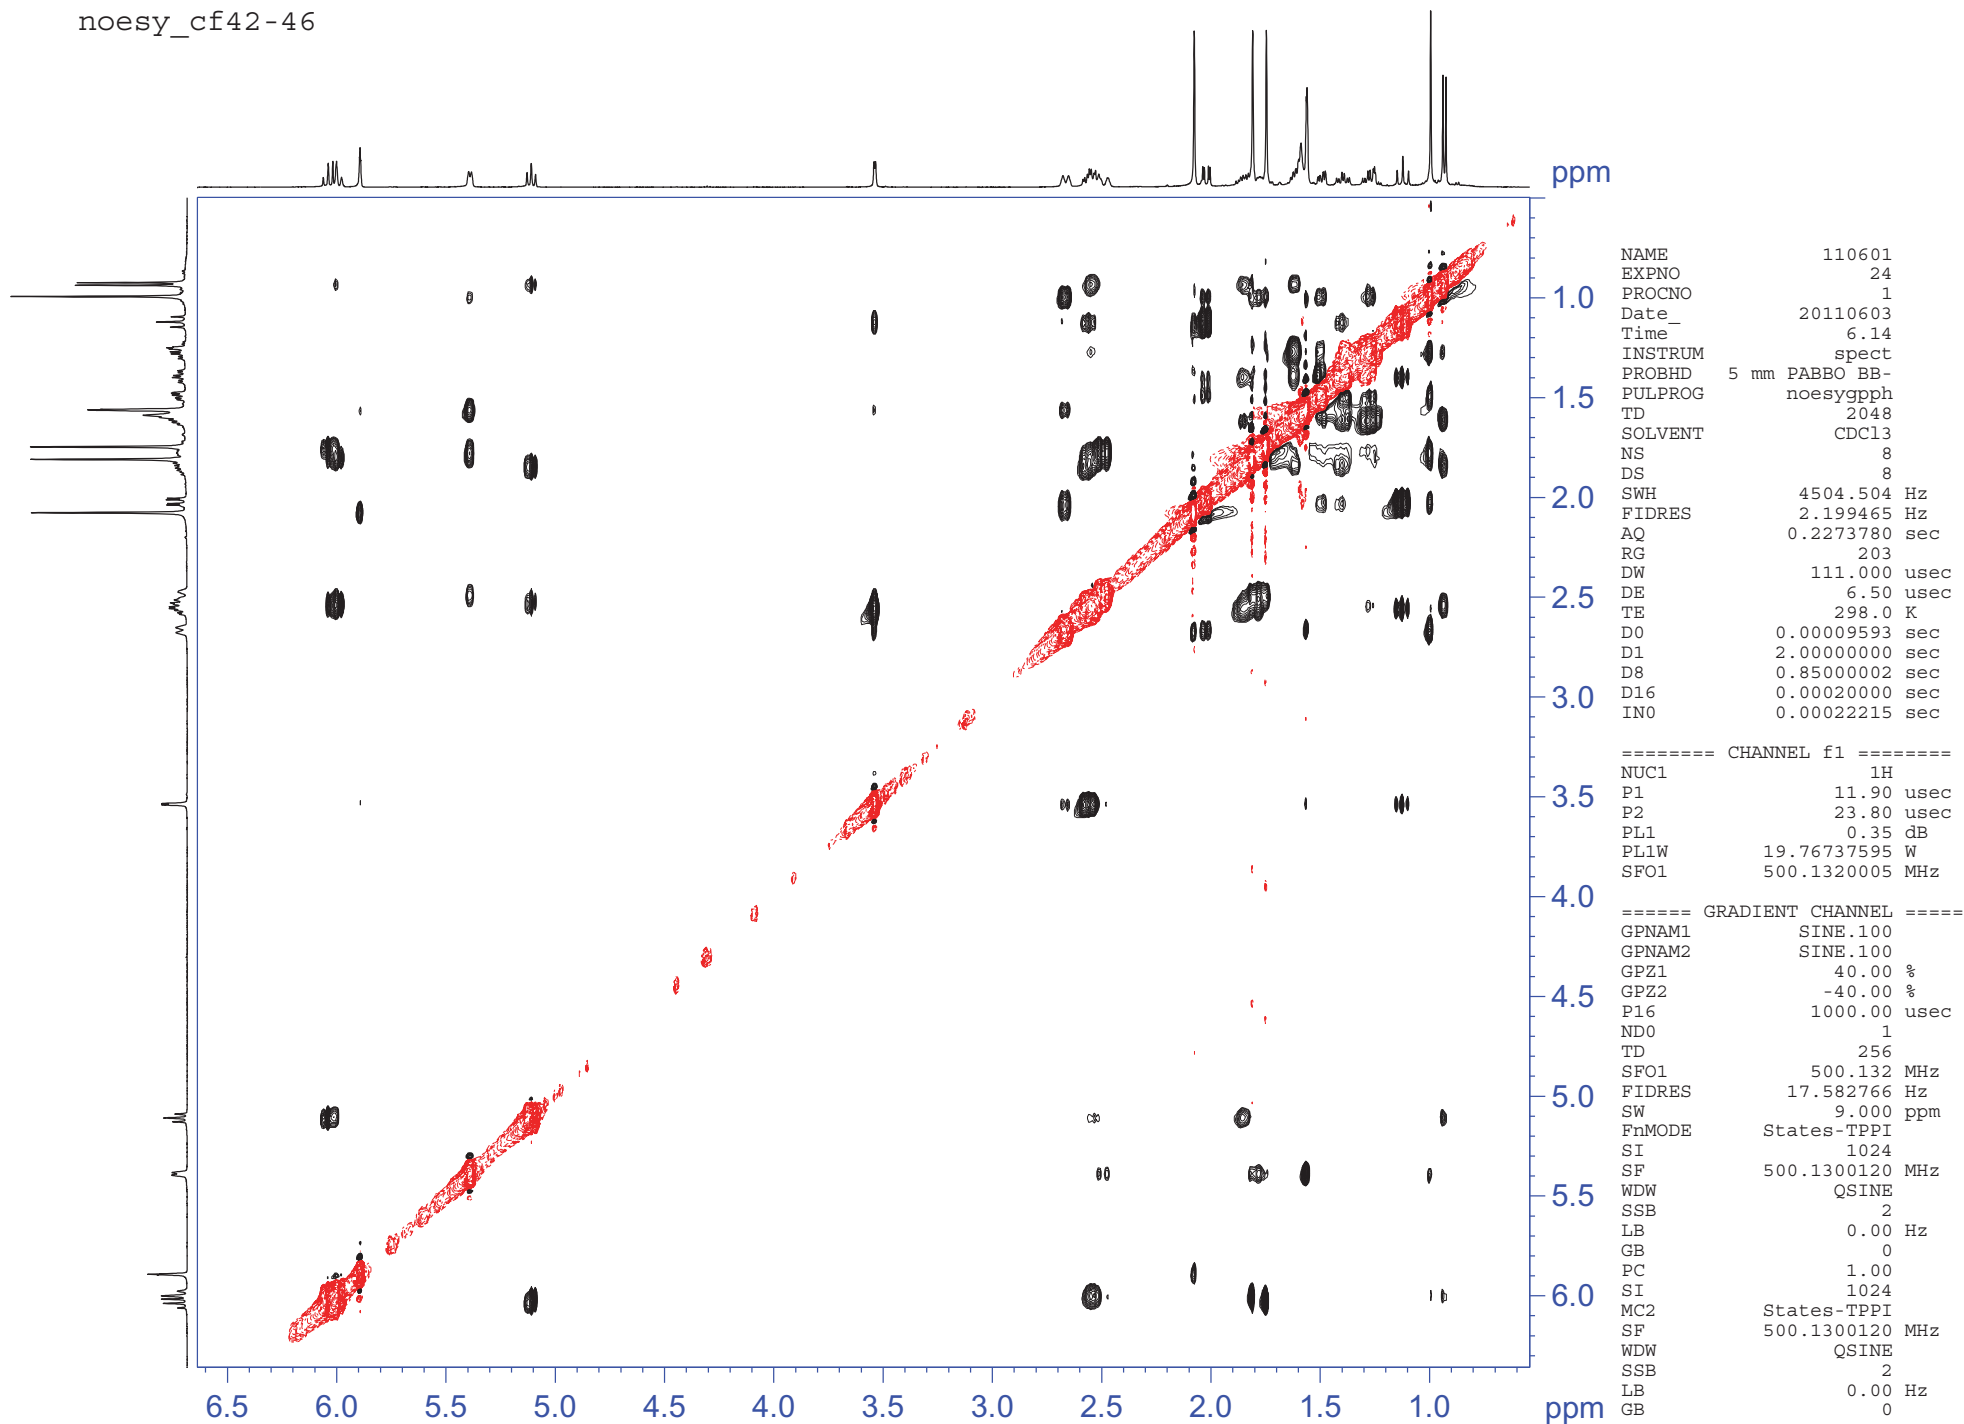

## Elemental Composition Report

Page 1

### Single Mass Analysis (displaying only valid results)

Tolerance = 10.0 PPM / DBE: min = 0.5, max = 40.0

Selected filters: None

Monoisotopic Mass, Odd and Even Electron Ions

14 formula(e) evaluated with 1 results within limits (up to 51 closest results for each mass)

Elements Used:

C: 0-200 H: 0-400 O: 0-2

cf42-46

17:05:47 27-Jun-2011

Voltage EI+

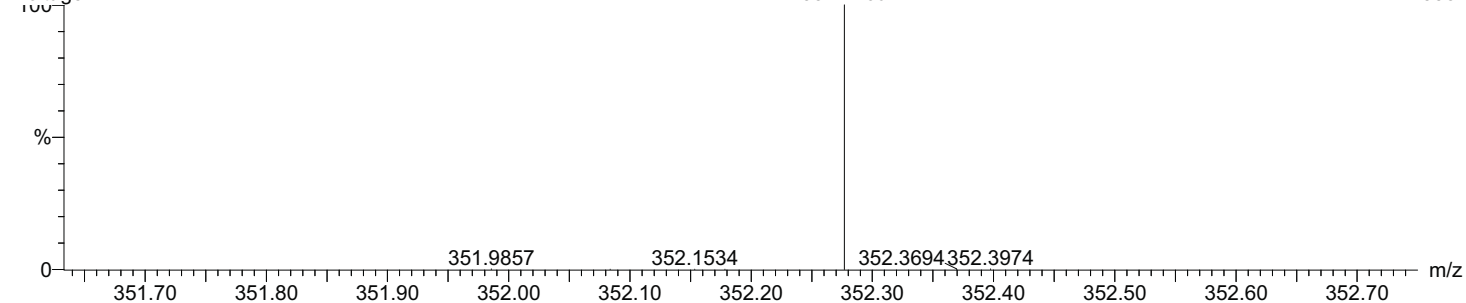

Minimum: 0.5  
Maximum: 100.0 10.0 40.0

| Mass     | Calc. Mass | mDa | PPM | DBE | i-FIT     | Formula   |
|----------|------------|-----|-----|-----|-----------|-----------|
| 352.2769 | 352.2766   | 0.3 | 0.9 | 8.0 | 5555400.5 | C25 H36 O |

cf42-49

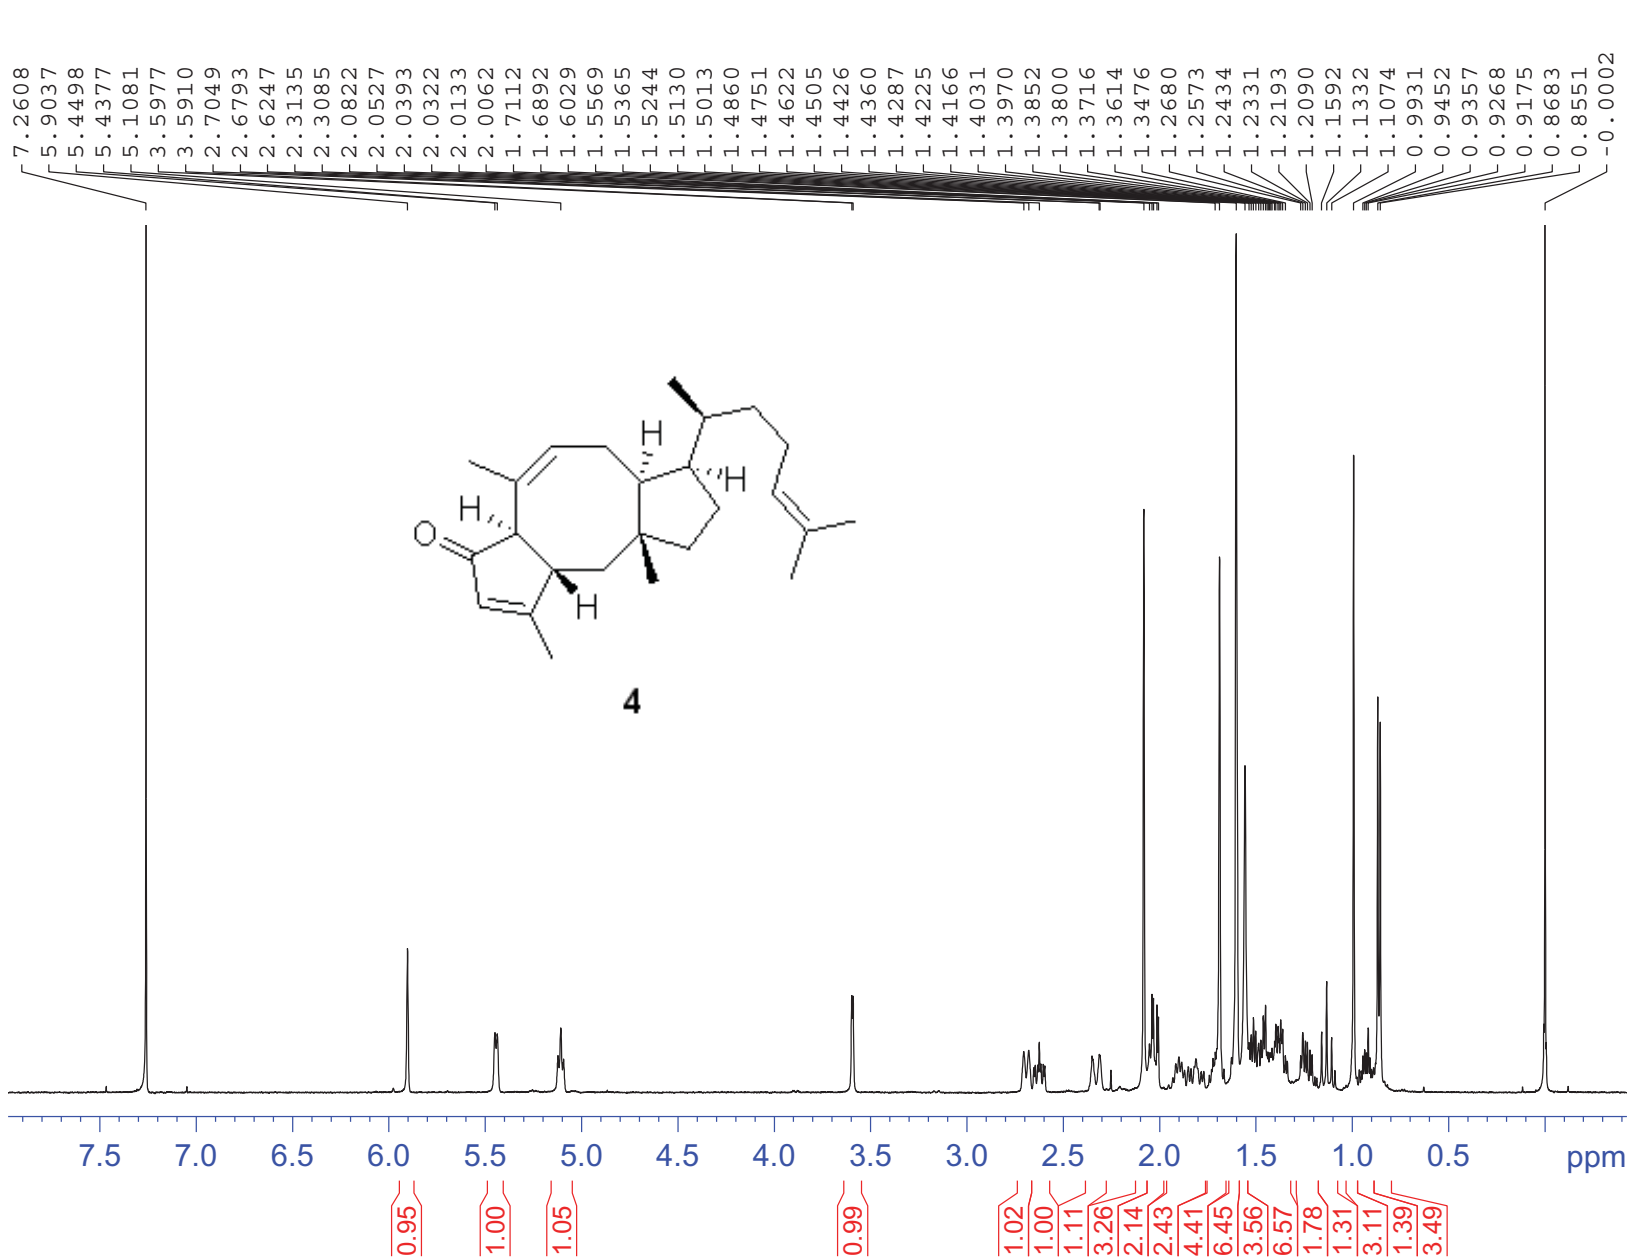

```
NAME 110531
EXPNO 7
PROCNO 1
Date_ 20110531
Time 9.57
INSTRUM spect
PROBHD 5 mm PABBO BB-
PULPROG zg30
TD 65536
SOLVENT CDCl3
NS 8
DS 0
SWH 10330.578 Hz
FIDRES 0.157632 Hz
AQ 3.1719923 sec
RG 203
DW 48.400 usec
DE 6.50 usec
TE 298.0 K
D1 1.00000000 sec
TD0 1

===== CHANNEL f1 =====
NUC1 1H
P1 11.90 usec
PL1 0.35 dB
PL1W 19.76737595 W
SFO1 500.1330885 MHz
SI 32768
SF 500.1300133 MHz
WDW EM
SSB 0
LB 0.30 Hz
GB 0
PC 1.00
```



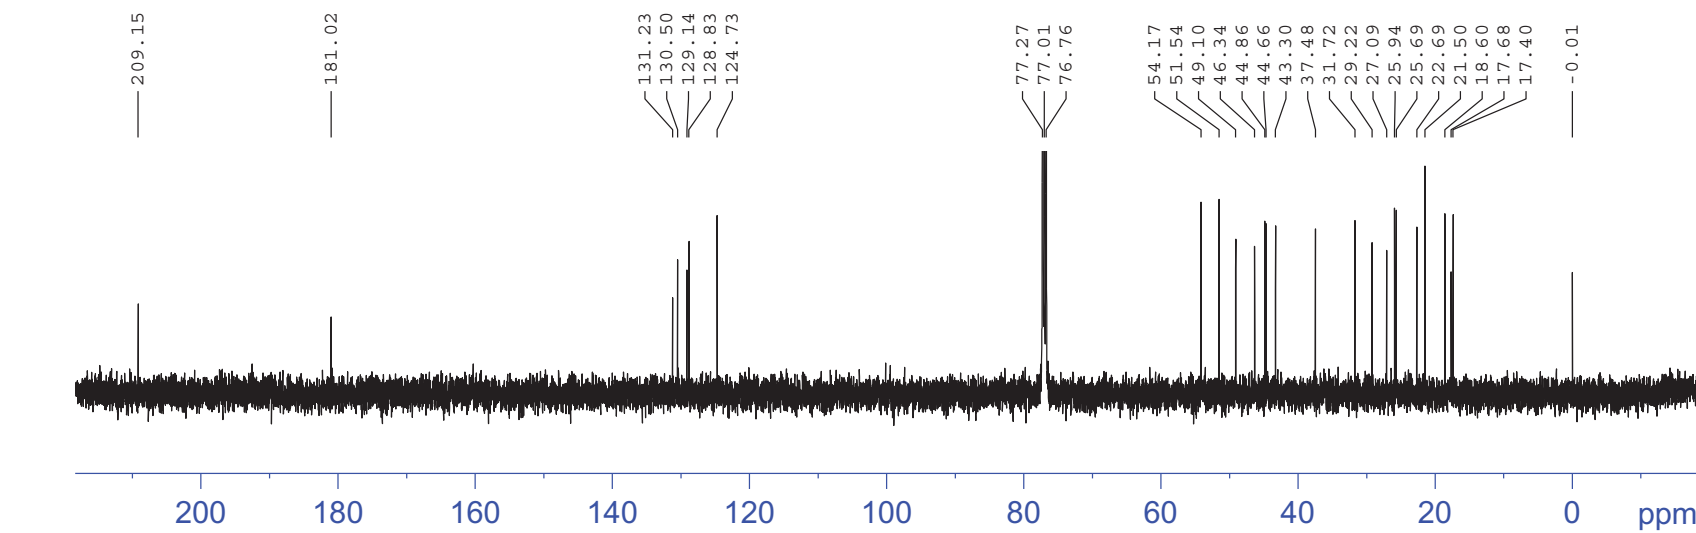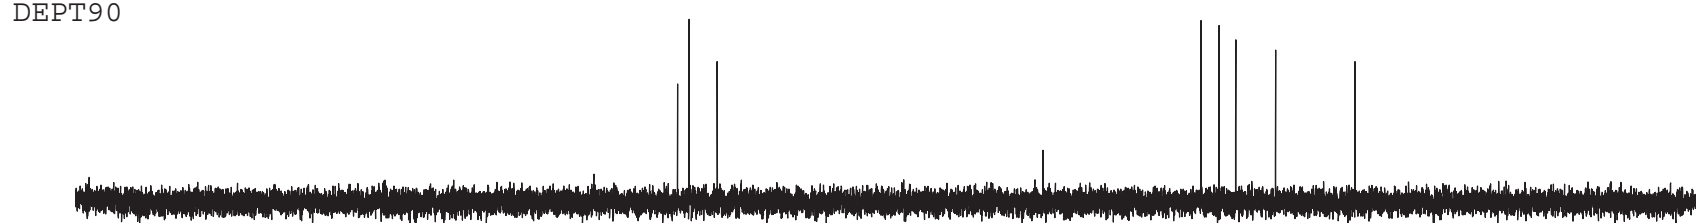

```
NAME 110601
EXPNO 11
PROCNO 1
Date_ 20110602
Time 16.14
INSTRUM spect
PROBHD 5 mm PABBO BB-
PULPROG zgpg30
TD 65536
SOLVENT CDCl3
NS 4
DS 4
SWH 29761.904 Hz
FIDRES 0.454113 Hz
AQ 1.1010548 sec
RG 203
DW 16.800 usec
DE 6.50 usec
TE 298.0 K
D1 2.0000000 sec
D11 0.0300000 sec
TD0 1
----- CHANNEL f1 -----
NUC1 13C
P1 10.04 usec
PL1 -1.00 dB
PL1W 106.25253296 W
SFO1 125.7703643 MHz
----- CHANNEL f2 -----
CHDPRG2 waltz16
NUC2 1H
PCP2 80.00 usec
P2 0.35 dB
PL2 16.90 dB
PL2W 19.76737595 W
PL3W 0.43747079 W
PL3W 0.42751271 W
SFO2 500.1320005 MHz
SI 32768
SF 125.7577890 MHz
WDW EM
SSB 0
LB 1.00 Hz
GB 0
PC 1.40
----- CHANNEL f1 -----
NAME 110601
EXPNO 11
PROCNO 1
Date_ 20110602
Time 16.27
INSTRUM spect
PROBHD 5 mm PABBO BB-
PULPROG zgpg30
TD 65536
SOLVENT CDCl3
NS 4
DS 4
SWH 29761.904 Hz
FIDRES 0.454113 Hz
AQ 1.1010548 sec
RG 203
DW 16.800 usec
DE 6.50 usec
TE 298.0 K
D1 2.0000000 sec
D11 0.0300000 sec
D12 0.00002000 sec
TD0 1
----- CHANNEL f1 -----
NUC1 13C
P1 10.04 usec
PL1 -1.00 dB
PL1W 106.25253296 W
SFO1 125.7703643 MHz
----- CHANNEL f2 -----
CHDPRG2 waltz16
NUC2 1H
PCP2 13.00 usec
P2 26.00 usec
P4 26.00 usec
PCP2 80.00 usec
P2 0.35 dB
PL2 16.90 dB
PL2W 19.76737595 W
PL3W 0.43747079 W
SFO2 500.1320005 MHz
SI 32768
SF 125.7577890 MHz
WDW EM
SSB 0
LB 1.00 Hz
GB 0
PC 1.40
----- CHANNEL f1 -----
NAME 110601
EXPNO 12
PROCNO 1
Date_ 20110602
Time 16.13
INSTRUM spect
PROBHD 5 mm PABBO BB-
PULPROG zgpg30
TD 65536
SOLVENT CDCl3
NS 4
DS 4
SWH 29761.904 Hz
FIDRES 0.454113 Hz
AQ 1.1010548 sec
RG 203
DW 16.800 usec
DE 6.50 usec
TE 298.0 K
D1 2.0000000 sec
D11 0.0344828 sec
D12 0.00002000 sec
TD0 1
----- CHANNEL f1 -----
NUC1 13C
P1 10.04 usec
PL1 -1.00 dB
PL1W 106.25253296 W
SFO1 125.7703643 MHz
----- CHANNEL f2 -----
CHDPRG2 waltz16
NUC2 1H
PCP2 13.00 usec
P2 26.00 usec
P4 26.00 usec
PCP2 80.00 usec
P2 0.35 dB
PL2 16.90 dB
PL2W 19.76737595 W
PL3W 0.43747079 W
SFO2 500.1320005 MHz
SI 32768
SF 125.7577890 MHz
WDW EM
SSB 0
LB 1.00 Hz
GB 0
PC 1.40
```

hsqc\_cf42-49

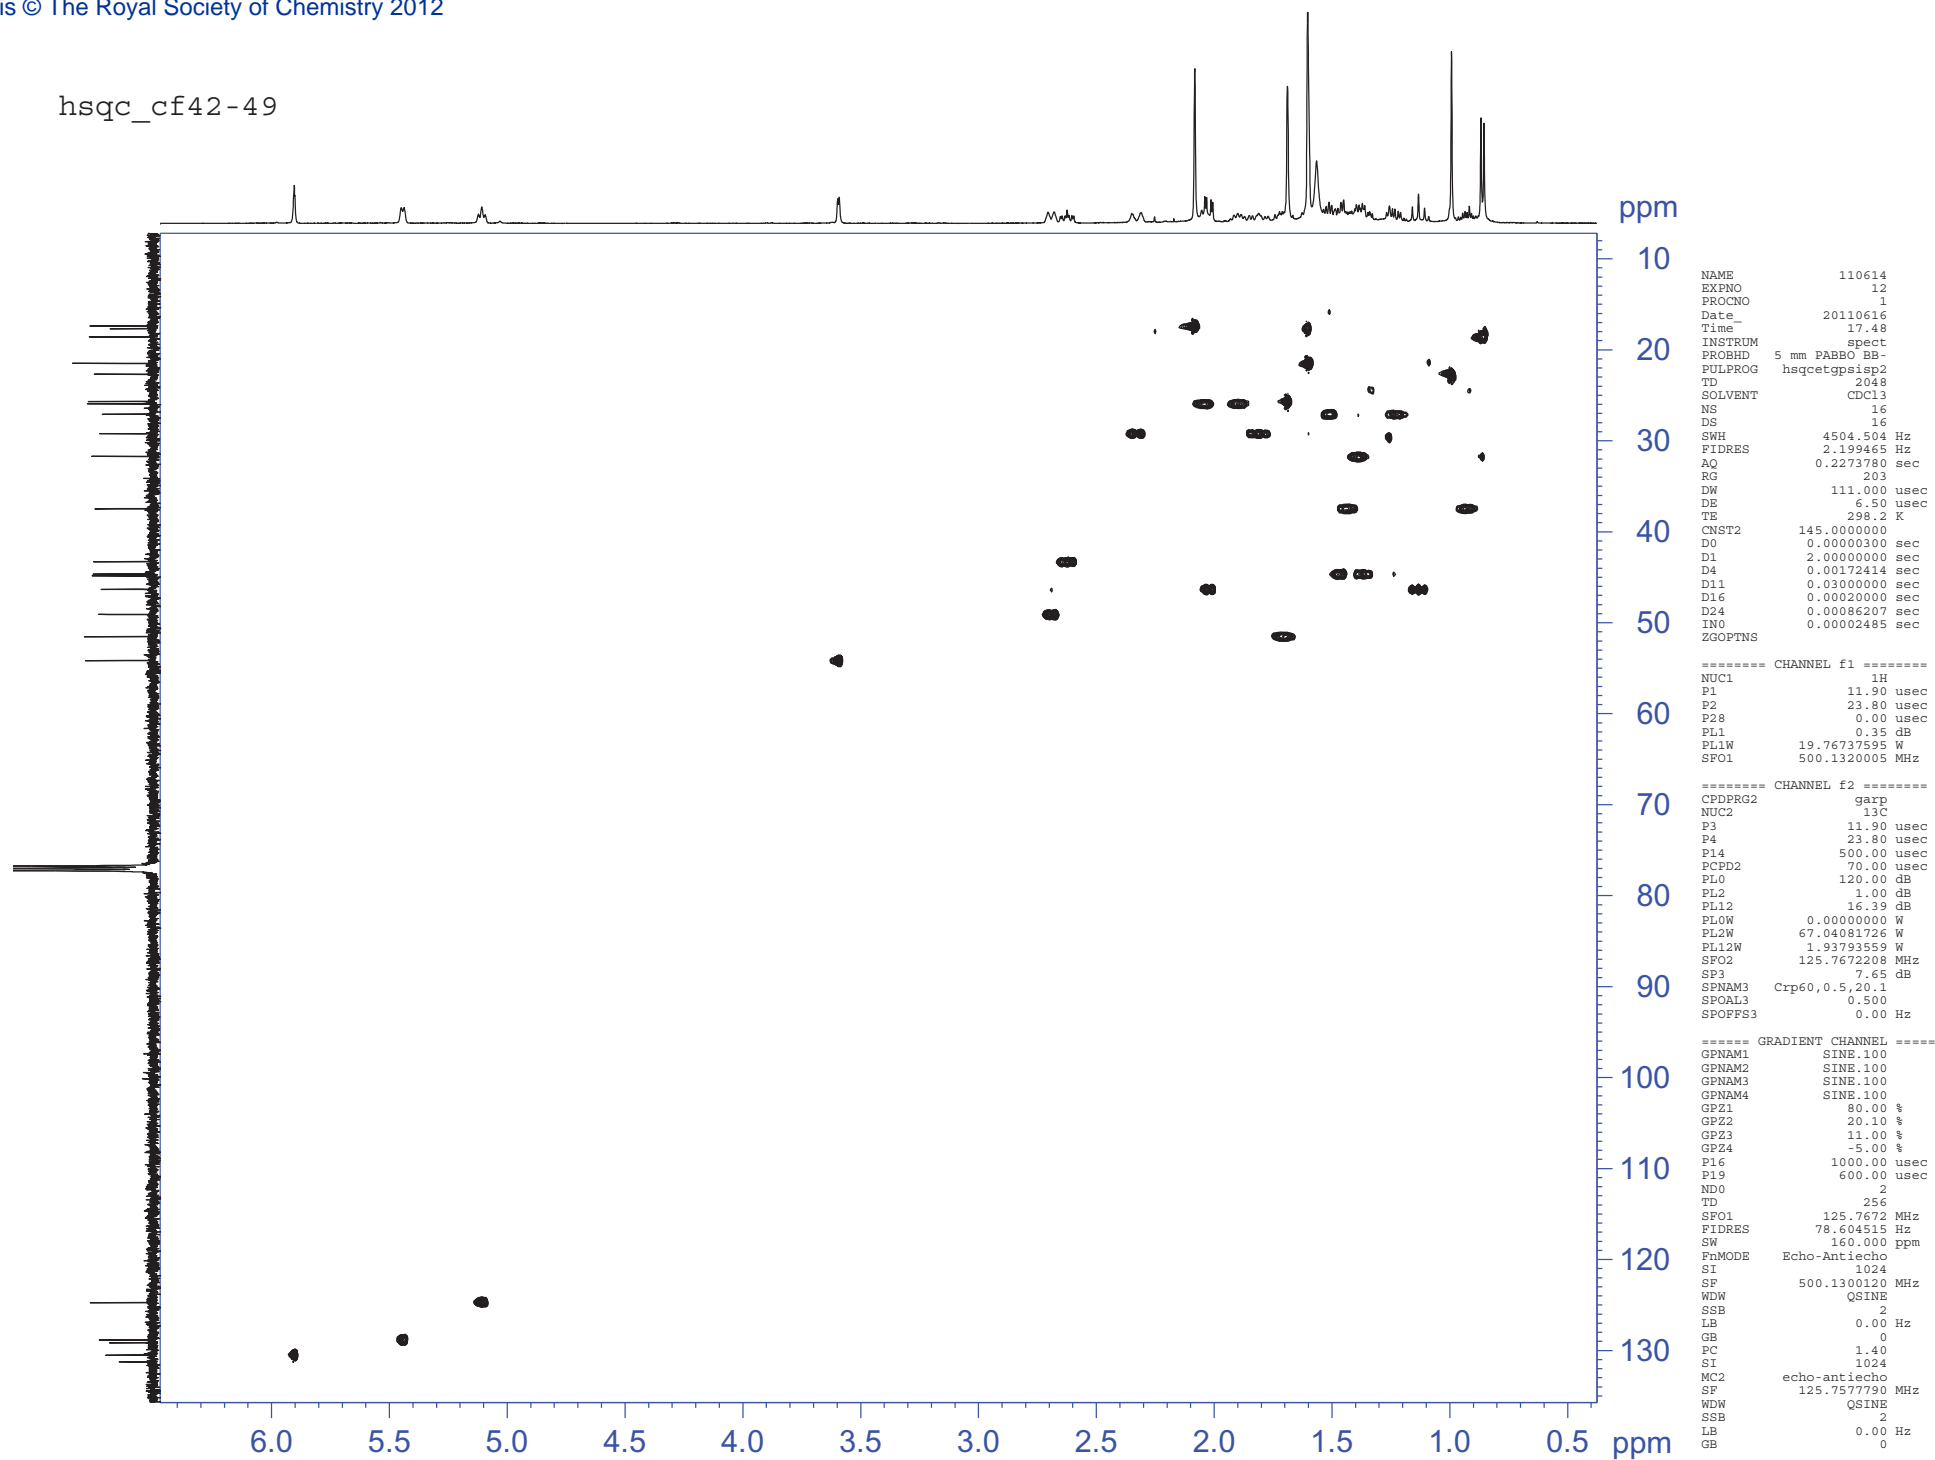

hmbc\_cf42-49

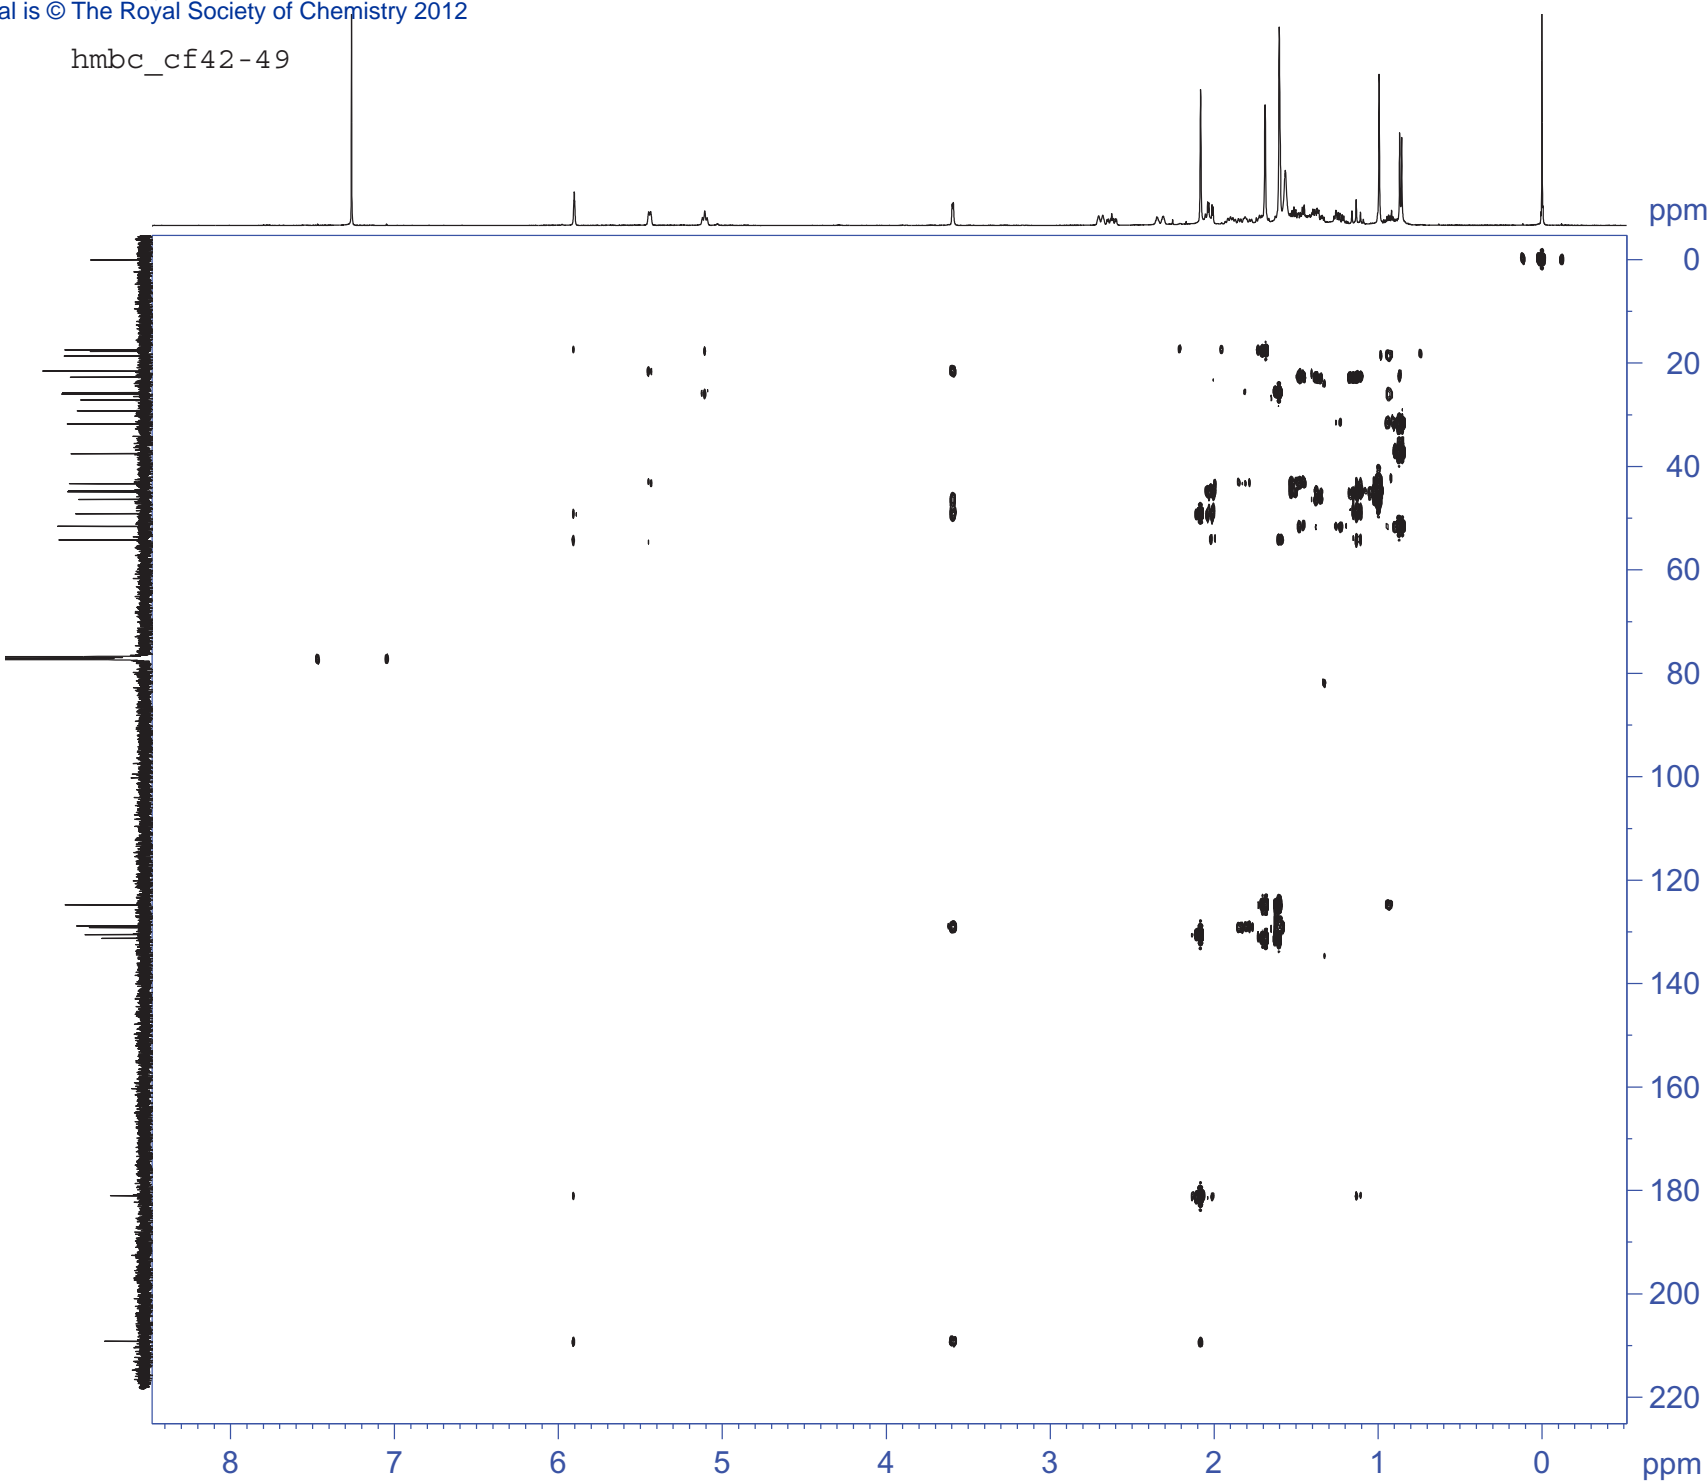

NAME 110614  
EXPNO 13  
PROCNO 1  
Date\_ 20110616  
Time\_ 20.22  
INSTRUM spect  
PROBHD 5 mm PABBO BB-  
PULPROG hmbcetgp12nd  
TD 4096  
SOLVENT CDCl3  
NS 32  
DS 16  
SWH 4504.504 Hz  
FIDRES 1.099733 Hz  
AQ 0.4547060 sec  
RG 203  
DW 111.000 usec  
DE 6.50 usec  
TE 298.0 K  
CNST6 120.0000000  
CNST7 180.0000000  
CNST13 7.0000000  
CNST30 0.5981119  
D0 0.00000300 sec  
D1 1.50000000 sec  
D6 0.07142857 sec  
D16 0.00020000 sec  
IN0 0.00001730 sec

===== CHANNEL f1 =====  
NUC1 1H  
P1 11.90 usec  
P2 23.80 usec  
PL1 0.35 dB  
PL1W 19.76737595 W  
SFO1 500.1320005 MHz

===== CHANNEL f2 =====  
NUC2 13C  
P3 11.90 usec  
P24 2000.00 usec  
PL2 1.00 dB  
PL2W 67.04081726 W  
SFO2 125.7716224 MHz  
SP7 7.65 dB  
SPNAM7 Crp60comp.4  
SPOAL7 0.500  
SPOFFS7 0.00 Hz

===== GRADIENT CHANNEL =====  
GPNAM1 SINE.100  
GPNAM3 SINE.100  
GPNAM4 SINE.100  
GPNAM5 SINE.100  
GPZ1 80.00 %  
GPZ3 15.00 %  
GPZ4 -10.00 %  
GPZ5 -5.00 %  
P16 1000.00 usec  
ND0 2  
TD 256  
SFO1 125.7716 MHz  
FIDRES 112.997940 Hz  
SW 230.000 ppm  
FnMODE Echo-Antiecho  
SI 1024  
SF 500.1300120 MHz  
WDW SINE  
SSB 0  
LB 0.00 Hz  
GB 0  
PC 1.40  
SI 1024  
MC2 echo-antiecho  
SF 125.7577790 MHz  
WDW SINE  
SSB 0  
LB 0.00 Hz  
GB 0

cosy\_cf42-49

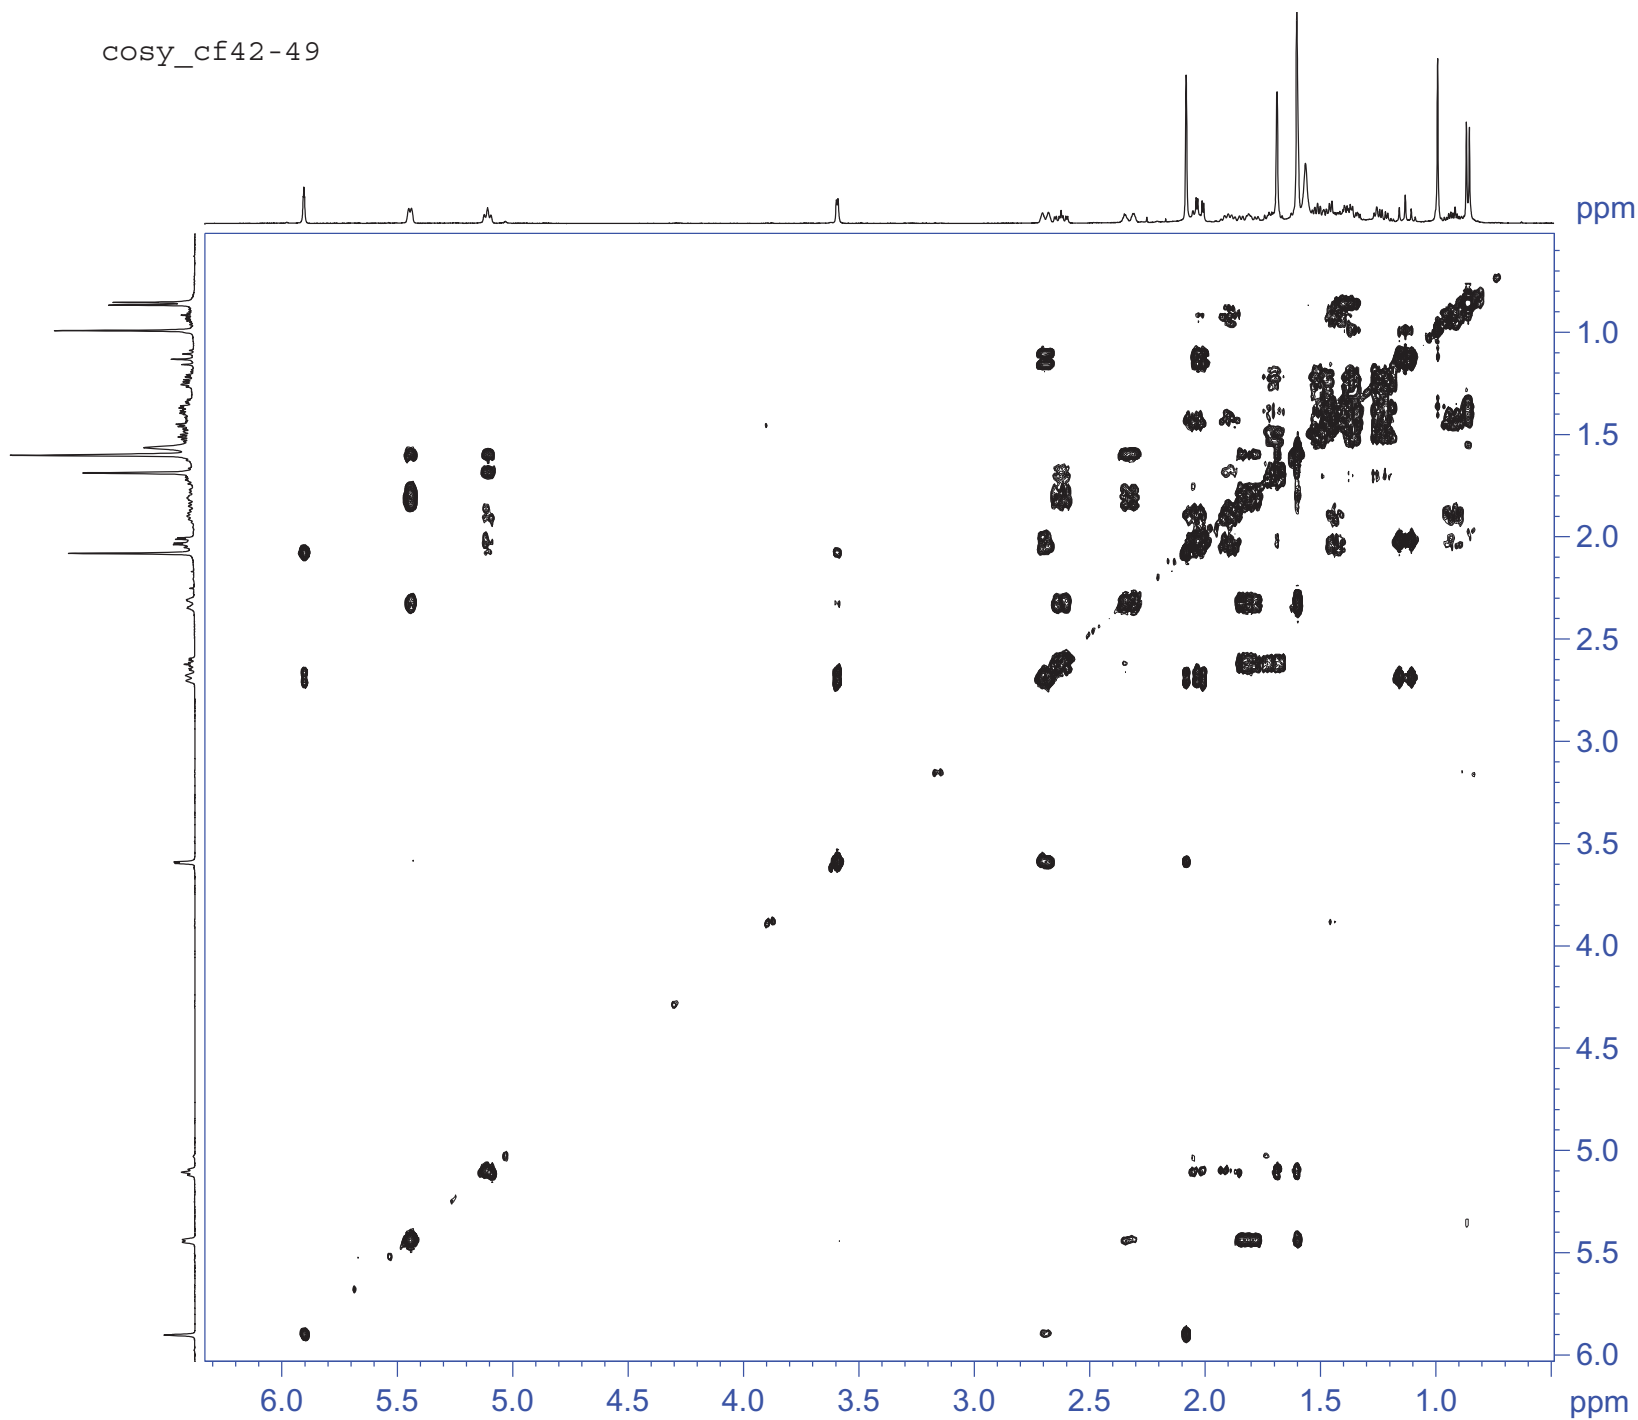

NAME 110614  
EXPNO 11  
PROCNO 1  
Date\_ 20110616  
Time\_ 17.07  
INSTRUM spect  
PROBHD 5 mm PABBO BB-  
PULPROG cosygpmfzf  
TD 2048  
SOLVENT CDCl3  
NS 4  
DS 16  
SWH 4504.504 Hz  
FIDRES 2.199465 Hz  
AQ 0.2273780 sec  
RG 203  
DW 111.000 usec  
DE 6.50 usec  
TE 298.0 K  
D0 0.00000300 sec  
D1 2.00000000 sec  
D13 0.00000400 sec  
D16 0.00020000 sec  
INO 0.00022215 sec

===== CHANNEL f1 =====  
NUC1 1H  
P1 11.90 usec  
PL1 0.35 dB  
PL1W 19.76737595 W  
SFO1 500.1320005 MHz

===== GRADIENT CHANNEL =====  
GPNAM1 SINE.100  
GPNAM2 SINE.100  
GPNAM3 SINE.100  
GPZ1 16.00 %  
GPZ2 12.00 %  
GPZ3 40.00 %  
P16 1000.00 usec  
ND0 1  
TD 256  
SFO1 500.132 MHz  
FIDRES 17.582766 Hz  
SW 9.000 ppm  
FnMODE QF  
SI 1024  
SF 500.1300129 MHz  
WDW SINE  
SSB 0  
LB 0.00 Hz  
GB 0  
PC 1.40  
SI 1024  
MC2 QF  
SF 500.1300129 MHz  
WDW SINE  
SSB 0  
LB 0.00 Hz  
GB 0

noesy\_cf42-49

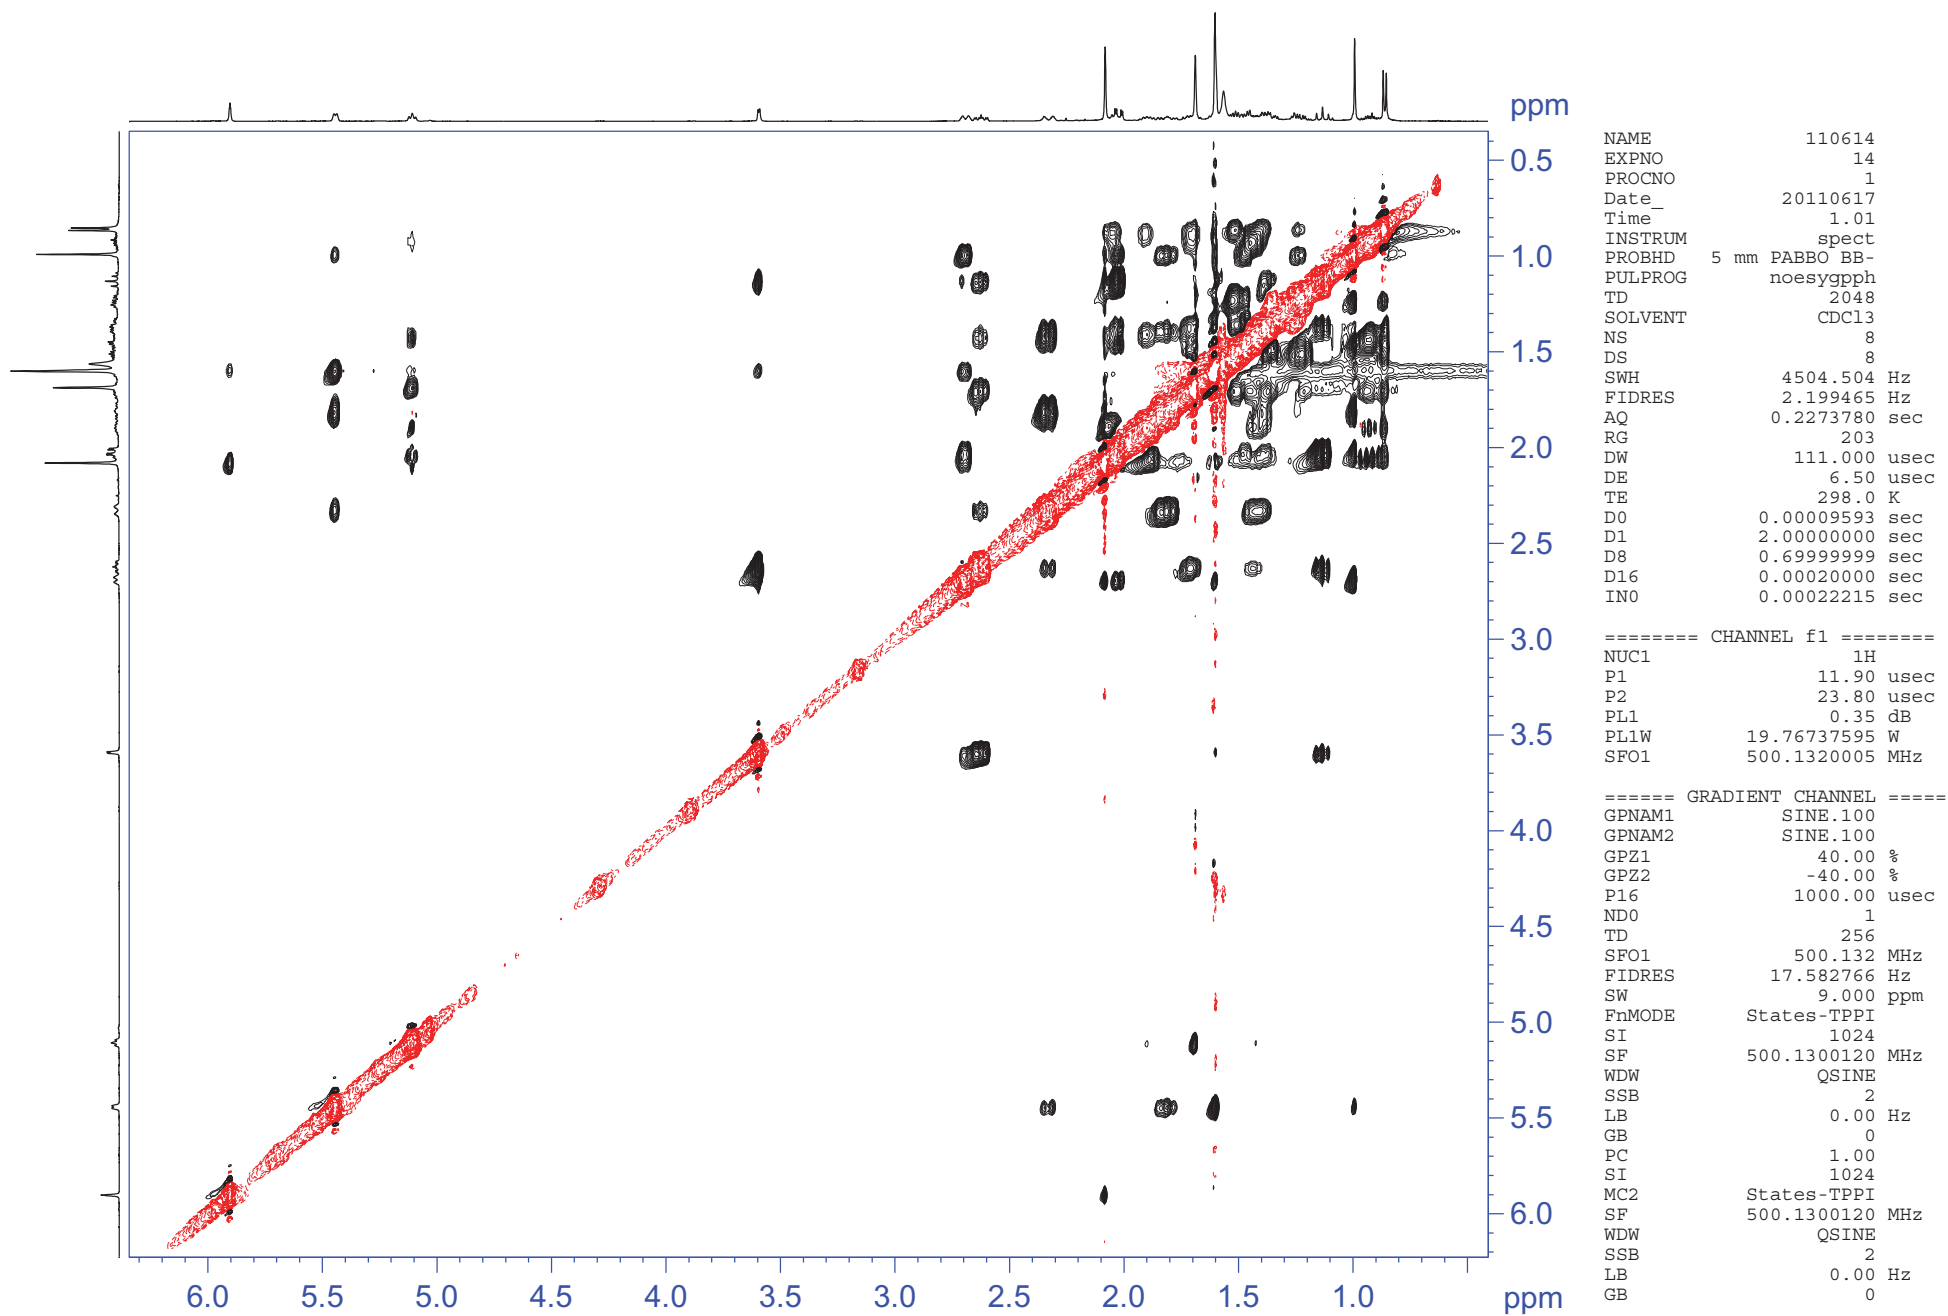

## Elemental Composition Report

Page 1

### Single Mass Analysis (displaying only valid results)

Tolerance = 10.0 PPM / DBE: min = 0.5, max = 40.0

Selected filters: None

Monoisotopic Mass, Odd and Even Electron Ions

14 formula(e) evaluated with 1 results within limits (up to 51 closest results for each mass)

Elements Used:

C: 0-200 H: 0-400 O: 0-2

cf42-49

17:10:45 27-Jun-2011

Voltage EI+

KIB  
M110627EA-02AFAMM 13 (1.194)  
354.2925

Autospec Premier  
P776  
4.16e4

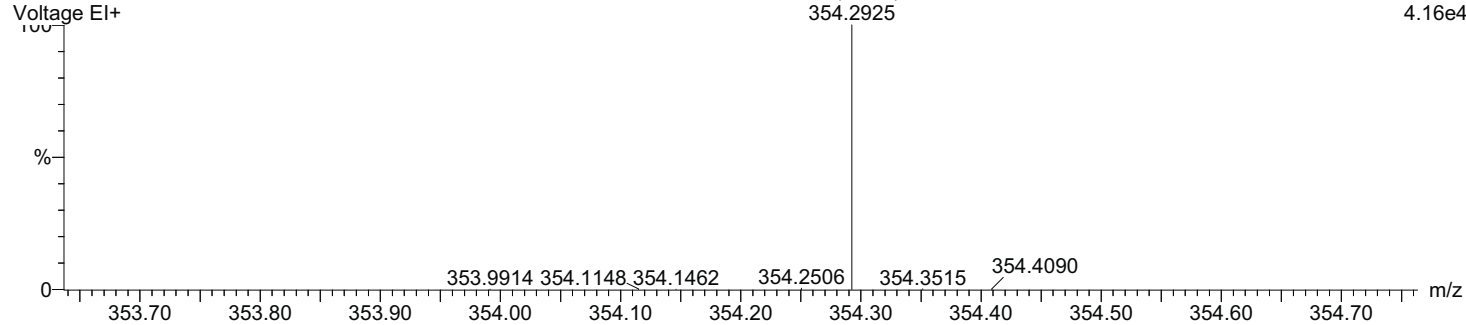

Minimum: 0.5  
Maximum: 100.0 10.0 40.0

| Mass     | Calc. Mass | mDa | PPM | DBE | i-FIT     | Formula   |
|----------|------------|-----|-----|-----|-----------|-----------|
| 354.2925 | 354.2923   | 0.2 | 0.6 | 7.0 | 5566810.5 | C25 H38 O |

cf42-23

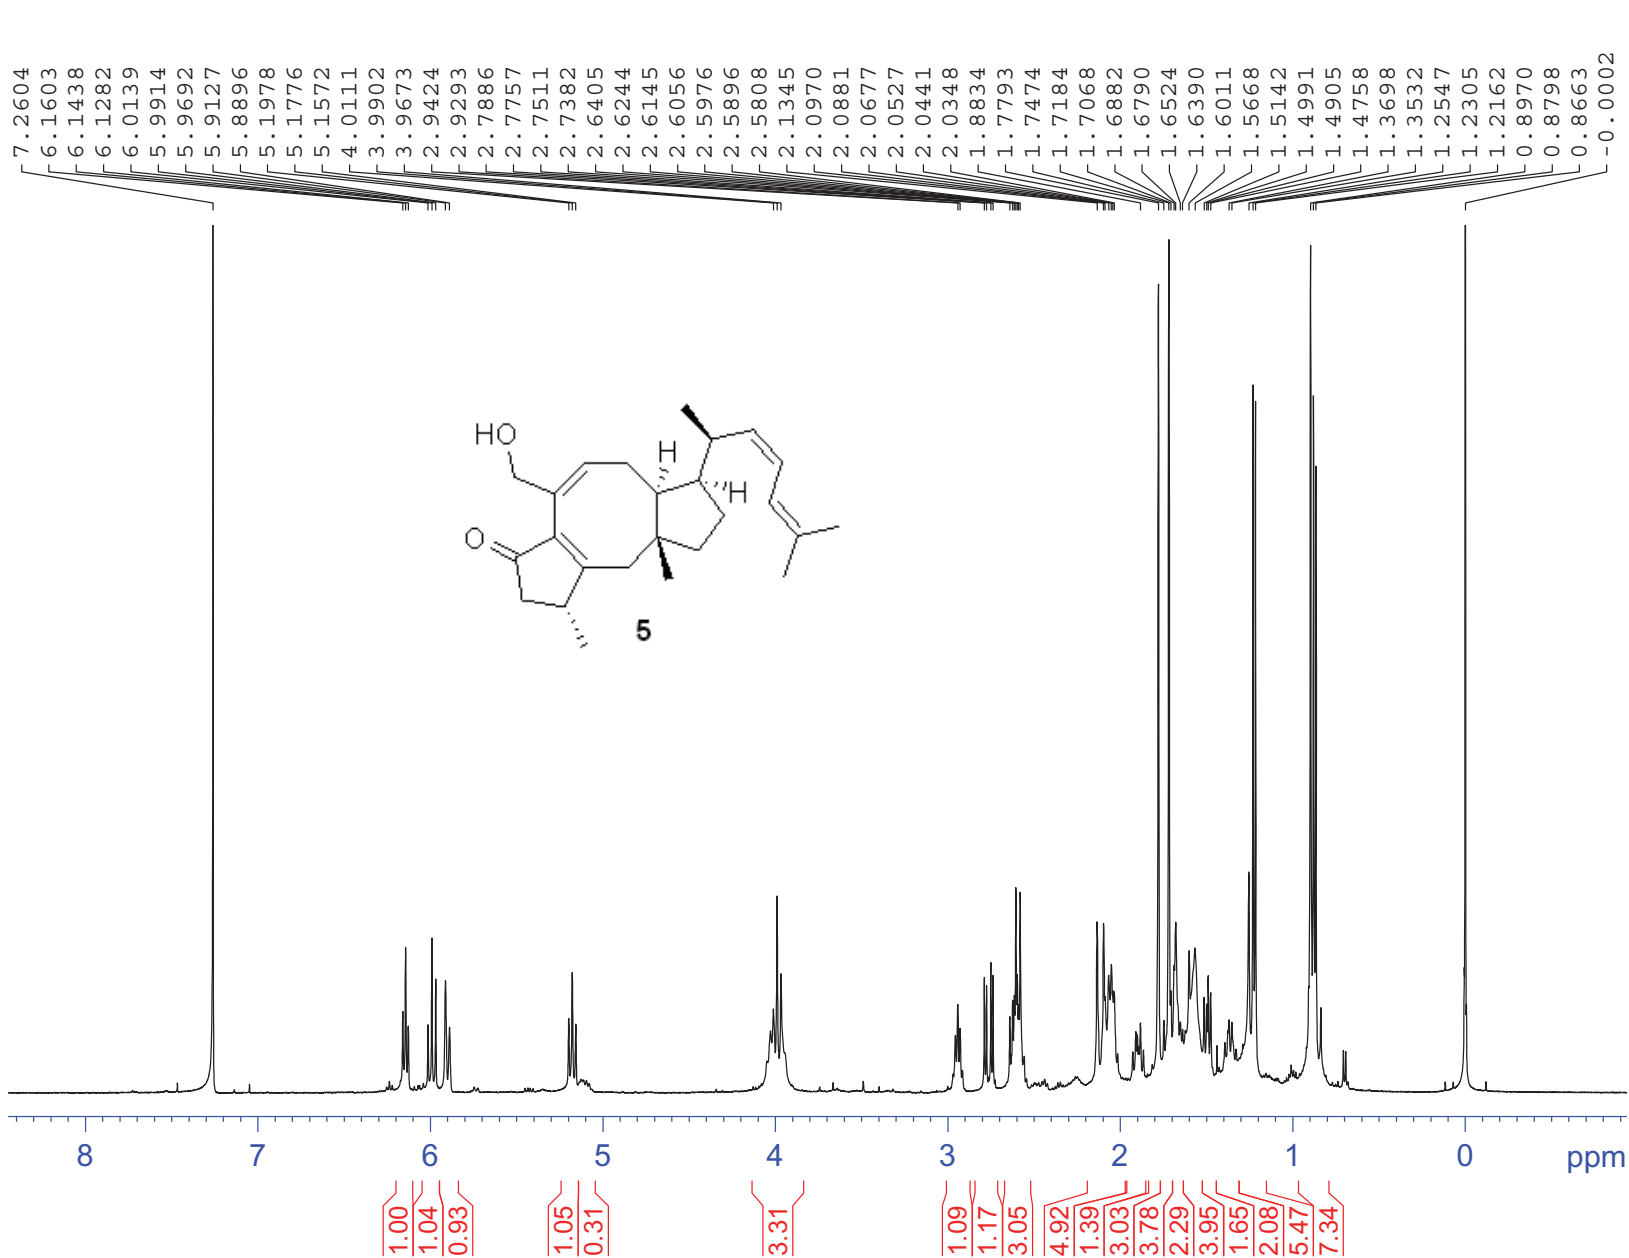

```
NAME 110330
EXPNO 4
PROCNO 1
Date_ 20110330
Time 15.07
INSTRUM spect
PROBHD 5 mm PABBO BB-
PULPROG zg30
TD 65536
SOLVENT CDCl3
NS 40
DS 0
SWH 10330.578 Hz
FIDRES 0.157632 Hz
AQ 3.1719923 sec
RG 181
DW 48.400 usec
DE 6.50 usec
TE 298.0 K
D1 1.00000000 sec
TD0 1

===== CHANNEL f1 =====
NUC1 1H
P1 11.90 usec
PL1 0.35 dB
PL1W 19.76737595 W
SFO1 500.1330885 MHz
SI 32768
SF 500.1300134 MHz
WDW EM
SSB 0
LB 0.30 Hz
GB 0
PC 1.00
```

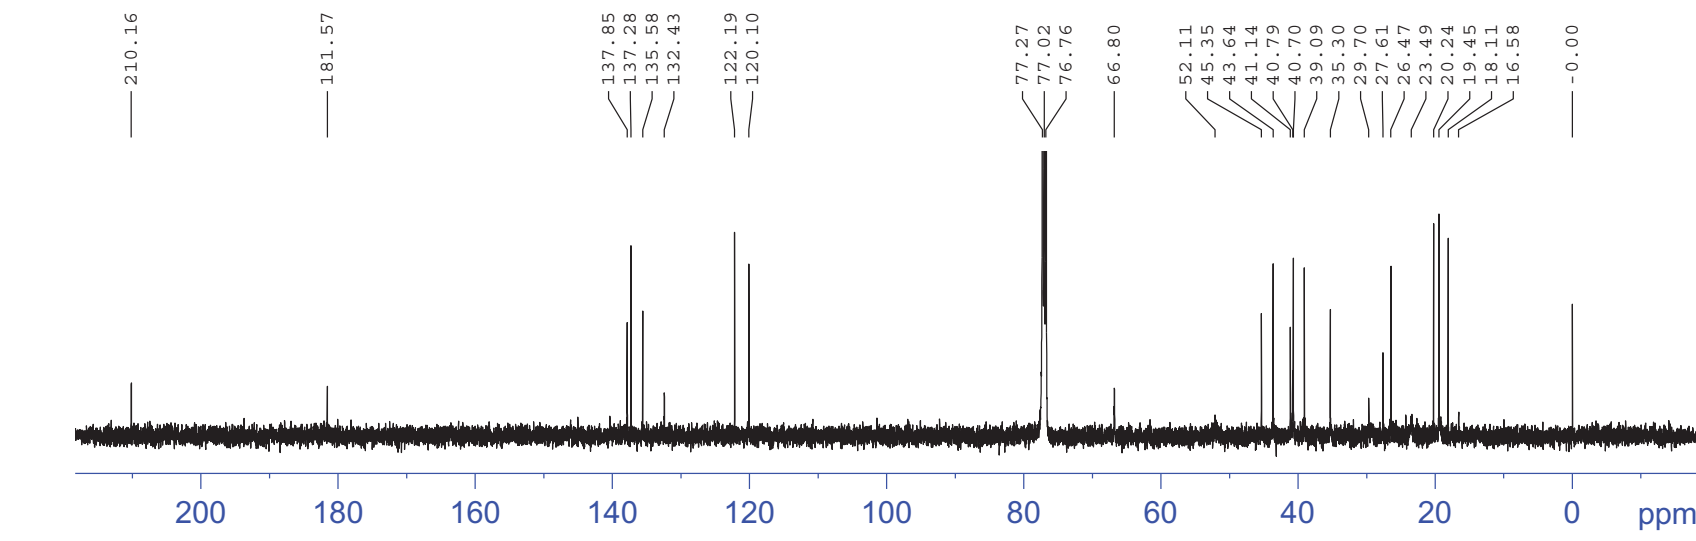

dept90

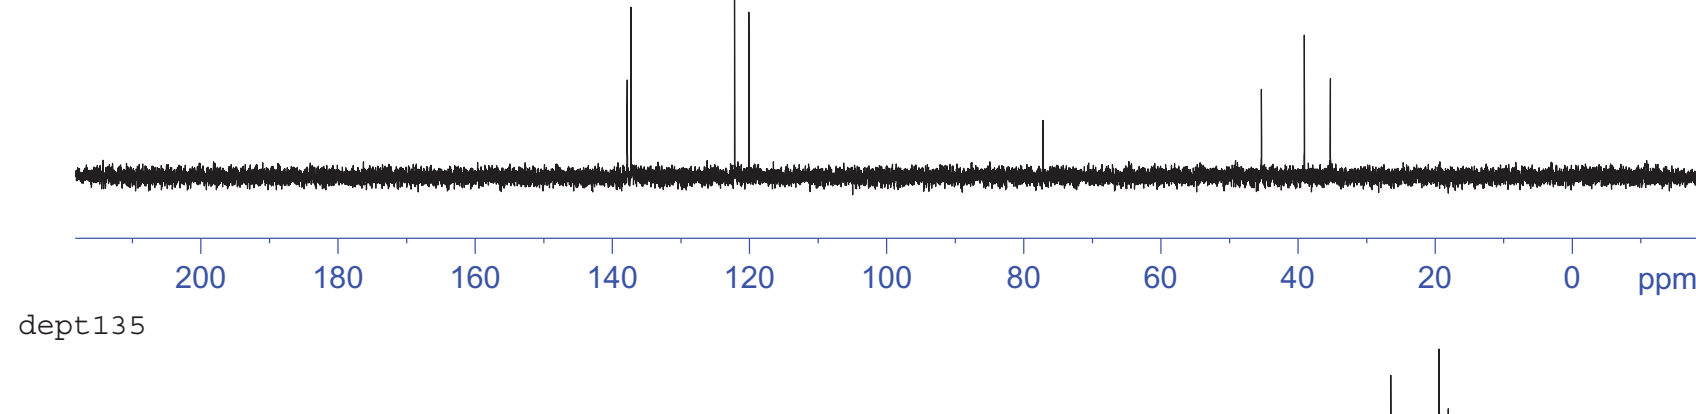

dept135

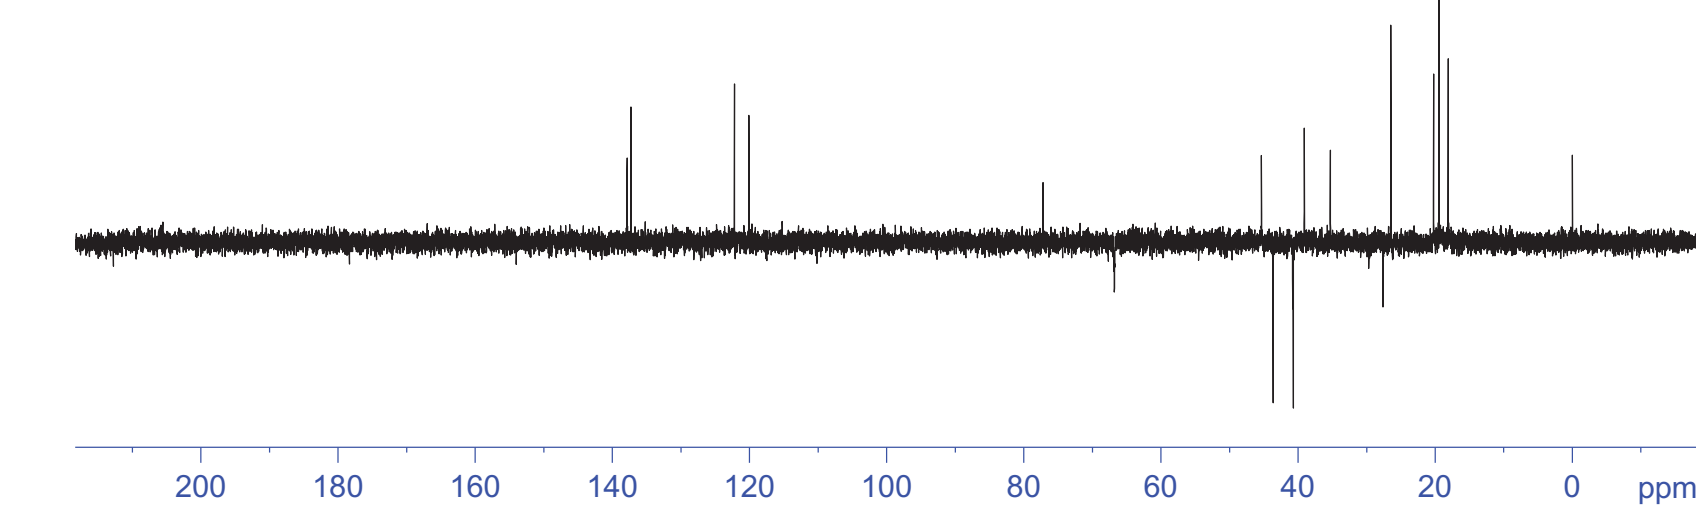

```

NAME      110401
EXPNO    18
PROCNO   1
Date_    20110406
Time     8.56
INSTRUM  spect
PROBHD   5 mm PABBO BB-
PULPROG  zgpg30
TD        65536
SOLVENT  CDCl3
NS        4
DS        4
SWH      29761.904 Hz
FIDRES   0.454113 Hz
AQ       1.1010548 sec
RG       203
DW       16.800 usec
DE       6.50 usec
TE       298.1 K
D1       2.0000000 sec
D11      0.0300000 sec
TD0      1
----- CHANNEL f1 -----
NUC1     13C
P1       10.04 usec
PL1      -1.00 dB
PL1W    106.25253296 W
SFO1    125.7703643 MHz
----- CHANNEL f2 -----
CHDPRG2  waltz16
NUC2     1H
PCPD2   80.00 usec
PL2     0.35 dB
PL12    16.90 dB
PL13    17.00 dB
PL2W    19.76737595 W
PL1W    0.43747079 W
PL13W   0.42751271 W
SFO2    500.1320005 MHz
SI       32768
SF       125.7577890 MHz
WDW      EM
SSB      0
LB       1.00 Hz
GB       0
PC       1.40
----- CHANNEL f1 -----
NAME      110401
EXPNO    40
PROCNO   1
Date_    20110406
Time     13.42
INSTRUM  spect
PROBHD   5 mm PABBO BB-
PULPROG  dept90
TD        65536
SOLVENT  CDCl3
NS        4
DS        4
SWH      29761.904 Hz
FIDRES   0.454113 Hz
AQ       1.1010548 sec
RG       203
DW       16.800 usec
DE       6.50 usec
TE       298.0 K
CNST2   145.0000000
D1       2.0000000 sec
D2       0.00344838 sec
D12      0.00002000 sec
TD0      1
----- CHANNEL f1 -----
NUC1     13C
P1       10.04 usec
P2       20.08 usec
PL1      -1.00 dB
PL2      20.08 dB
PL1W    106.25253296 W
SFO1    125.7703643 MHz
----- CHANNEL f2 -----
CHDPRG2  waltz16
NUC2     1H
P3       13.00 usec
P4       26.00 usec
PCPD2   80.00 usec
PL2     0.35 dB
PL12    16.90 dB
PL13    17.00 dB
PL2W    19.76737595 W
PL1W    0.43747079 W
SFO2    500.1320005 MHz
SI       32768
SF       125.7577890 MHz
WDW      EM
SSB      0
LB       1.00 Hz
GB       0
PC       1.40
----- CHANNEL f1 -----
NAME      110401
EXPNO    19
PROCNO   1
Date_    20110406
Time     13.22
INSTRUM  spect
PROBHD   5 mm PABBO BB-
PULPROG  dept135
TD        65536
SOLVENT  CDCl3
NS        4
DS        4
SWH      29761.904 Hz
FIDRES   0.454113 Hz
AQ       1.1010548 sec
RG       203
DW       16.800 usec
DE       6.50 usec
TE       298.0 K
CNST2   145.0000000
D1       2.0000000 sec
D2       0.00344838 sec
D12      0.00002000 sec
TD0      1
----- CHANNEL f1 -----
NUC1     13C
P1       10.04 usec
P2       20.08 usec
PL1      -1.00 dB
PL2      20.08 dB
PL1W    106.25253296 W
SFO1    125.7703643 MHz
----- CHANNEL f2 -----
CHDPRG2  waltz16
NUC2     1H
P3       13.00 usec
P4       26.00 usec
PCPD2   80.00 usec
PL2     0.35 dB
PL12    16.90 dB
PL13    17.00 dB
PL2W    19.76737595 W
PL1W    0.43747079 W
SFO2    500.1320005 MHz
SI       32768
SF       125.7577890 MHz
WDW      EM
SSB      0
LB       1.00 Hz
GB       0
PC       1.40
    
```



hsqc\_cf42-23

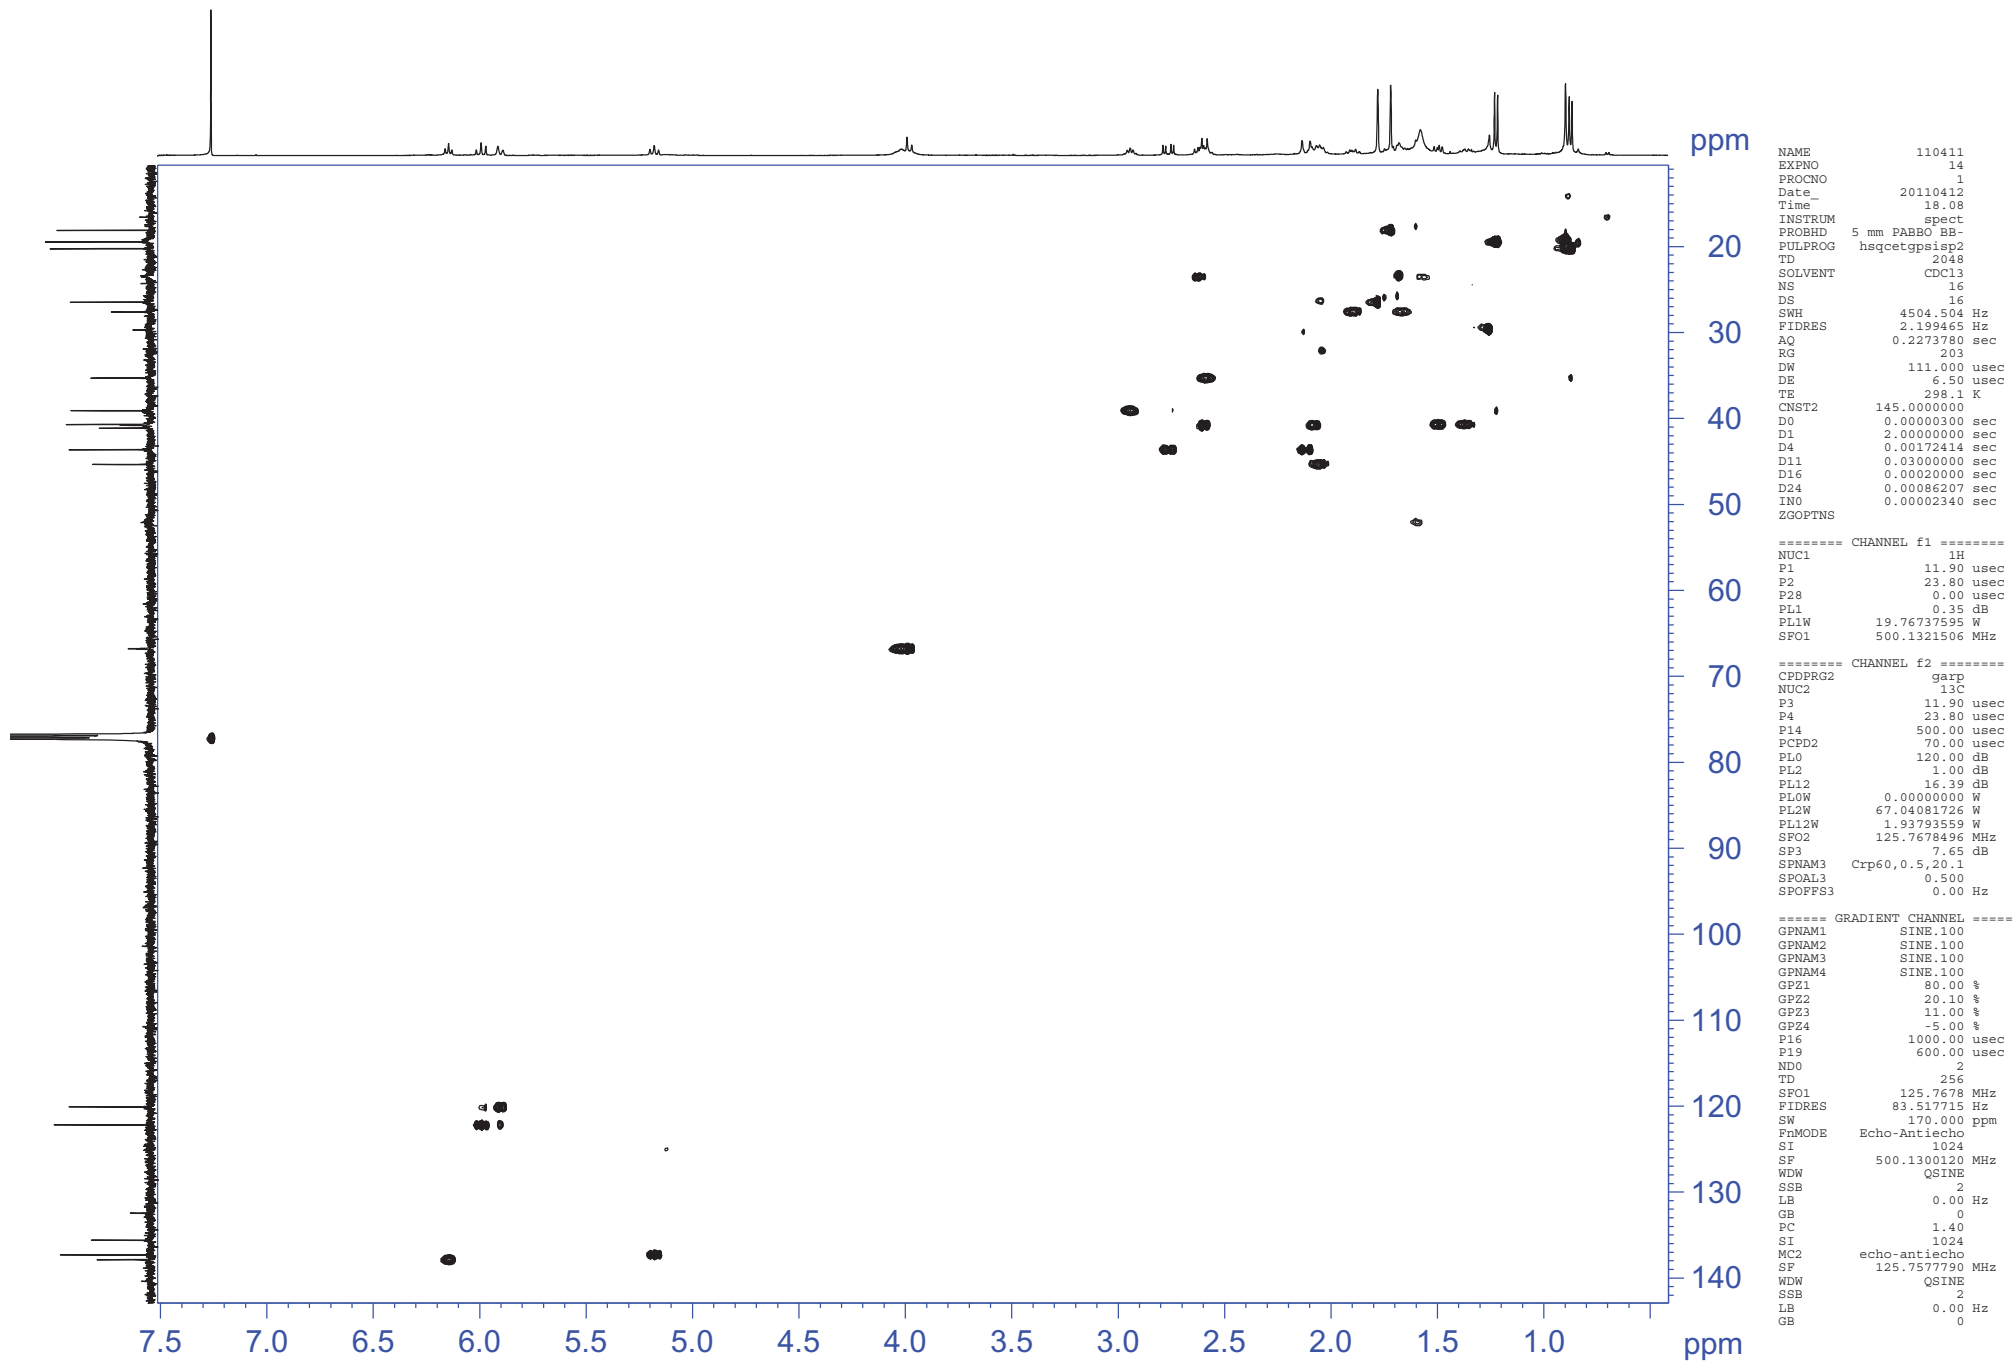

hmbc\_cf42-23

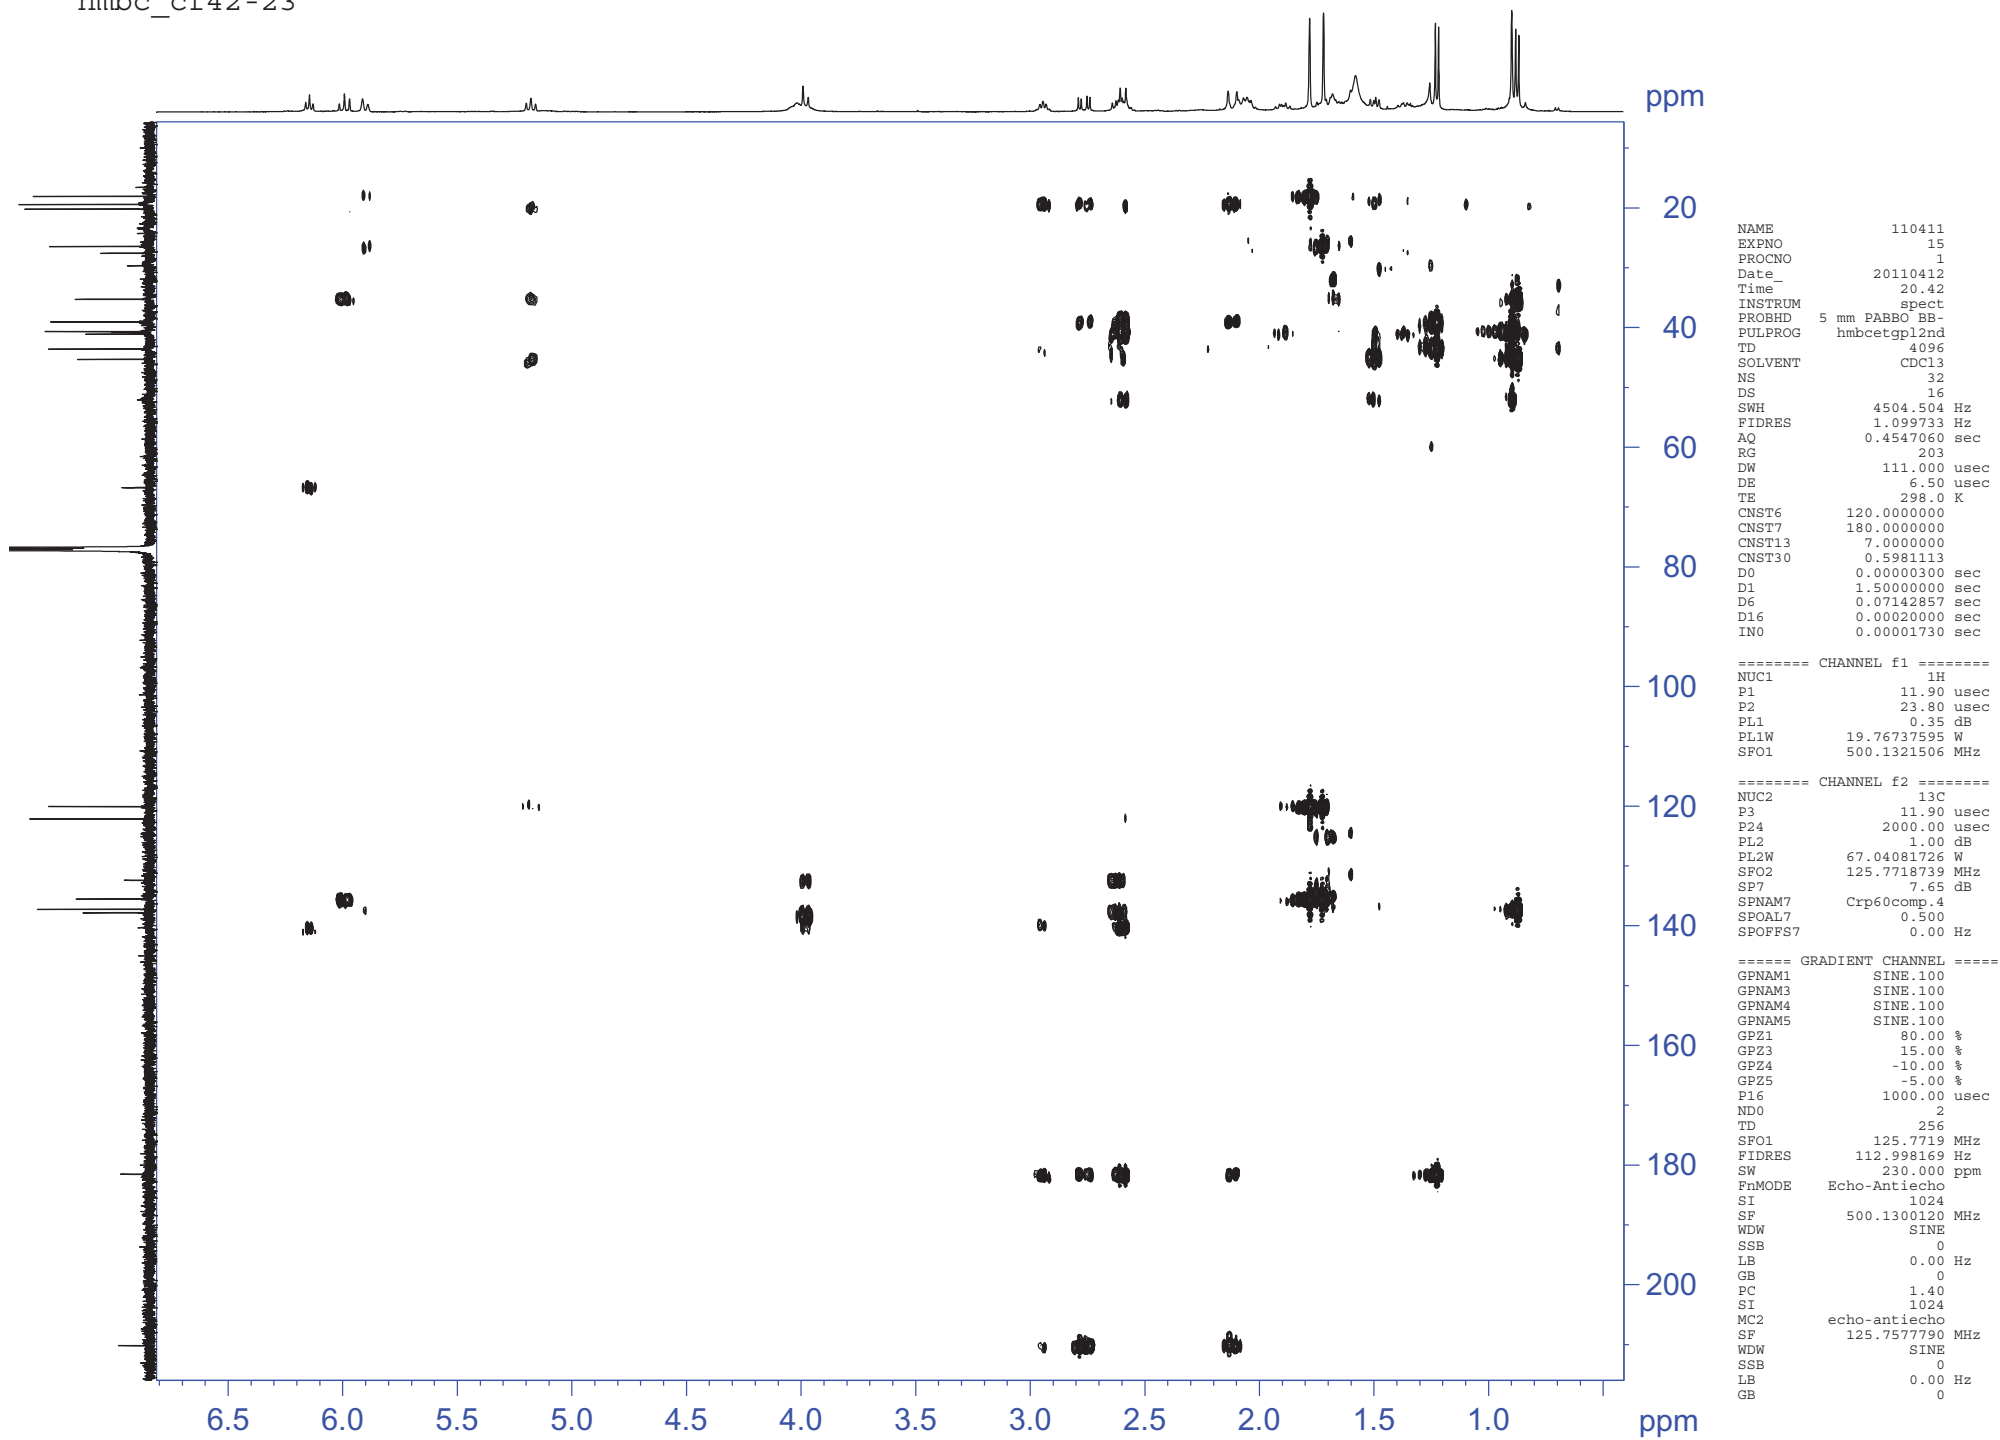

cosy\_cf42-23

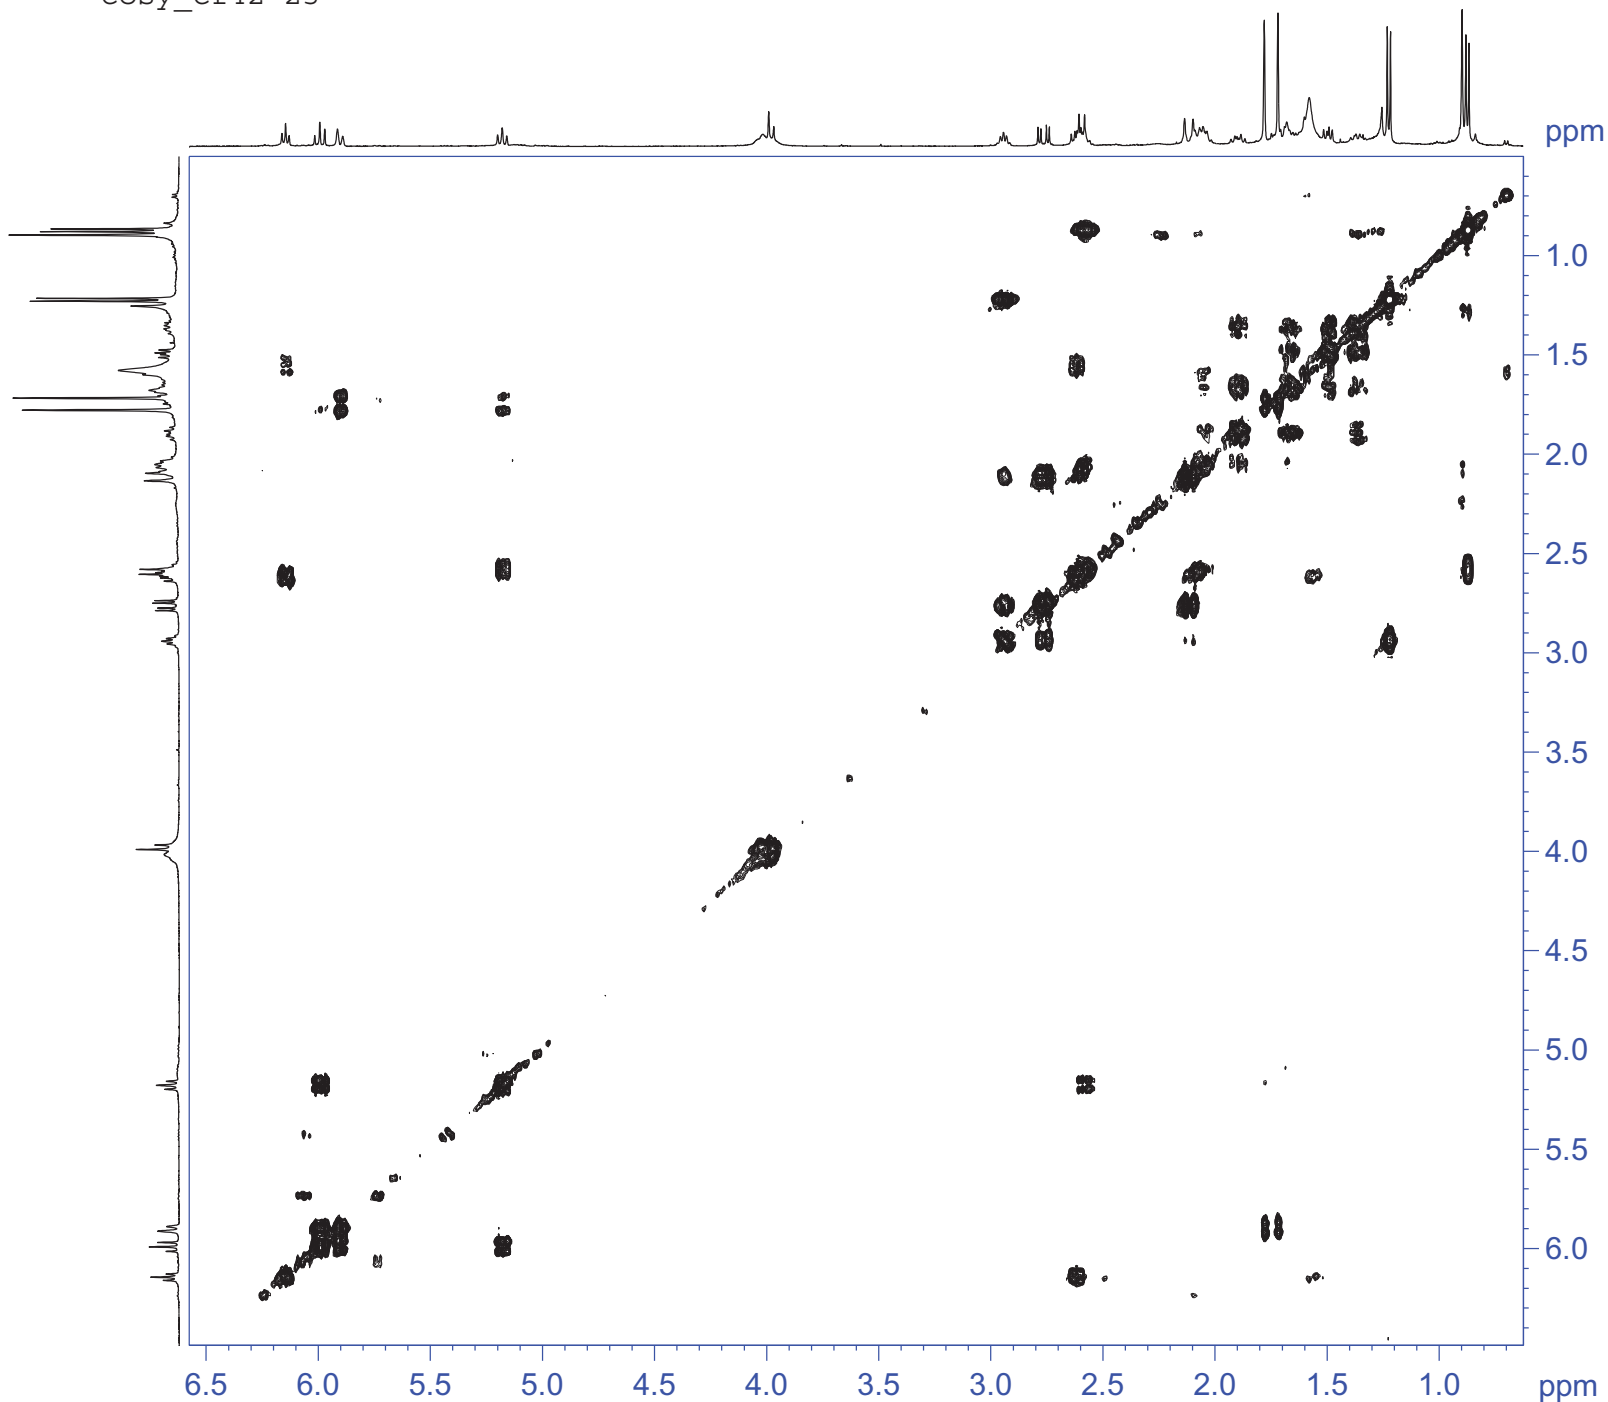

```
NAME          110411
EXPNO         13
PROCNO        1
Date_         20110412
Time_         16.49
INSTRUM       spect
PROBHD        5 mm PABBO BB-
PULPROG       cosygpmfqf
TD            2048
SOLVENT       CDC13
NS            8
DS            8
SWH           4504.504 Hz
FIDRES        2.199465 Hz
AQ            0.2273780 sec
RG            203
DW            111.000 usec
DE            6.50 usec
TE            298.0 K
D0            0.00000300 sec
D1            2.00000000 sec
D13           0.00000400 sec
D16           0.00020000 sec
IN0           0.00022215 sec
```

```
===== CHANNEL f1 =====
NUC1          1H
P1            11.90 usec
PL1           0.35 dB
PL1W          19.76737595 W
SFO1          500.1321506 MHz
```

```
===== GRADIENT CHANNEL =====
GPNAM1       SINE.100
GPNAM2       SINE.100
GPNAM3       SINE.100
GPZ1         16.00 %
GPZ2         12.00 %
GPZ3         40.00 %
P16          1000.00 usec
ND0          1
TD           256
SFO1         500.1322 MHz
FIDRES       17.582771 Hz
SW           9.000 ppm
FnMODE       QF
SI           1024
SF           500.1300129 MHz
WDW          SINE
SSB          0
LB           0.00 Hz
GB           0
PC           1.40
SI           1024
MC2          QF
SF           500.1300129 MHz
WDW          SINE
SSB          0
LB           0.00 Hz
GB           0
```

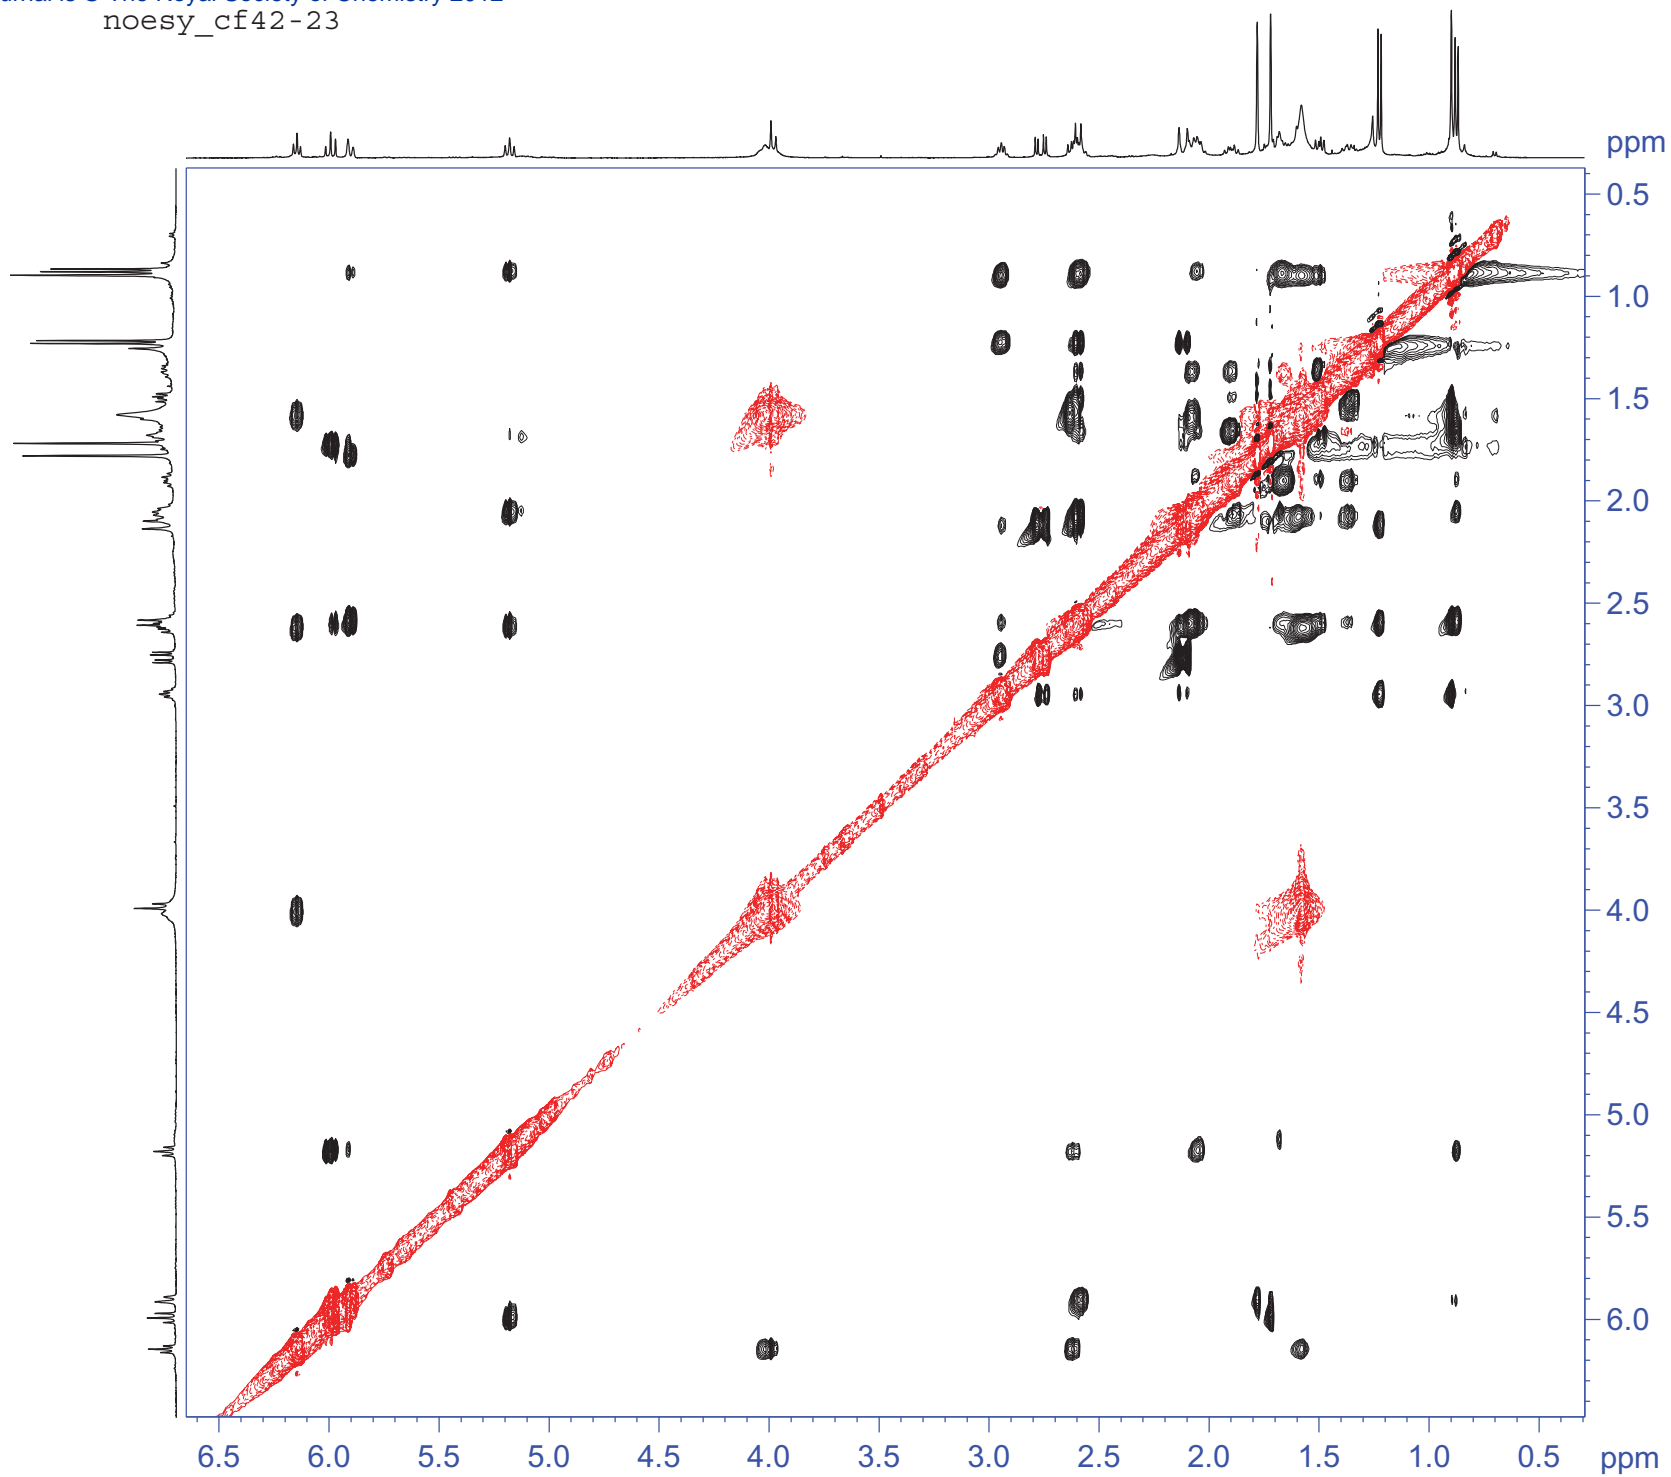

NAME 110411  
EXPNO 16  
PROCNO 1  
Date\_ 20110413  
Time\_ 1.22  
INSTRUM spect  
PROBHD 5 mm PABBO BB-  
PULPROG noesygp  
TD 2048  
SOLVENT CDCl3  
NS 16  
DS 16  
SWH 4504.504 Hz  
FIDRES 2.199465 Hz  
AQ 0.2273780 sec  
RG 203  
DW 111.000 usec  
DE 6.50 usec  
TE 298.0 K  
D0 0.00009593 sec  
D1 2.00000000 sec  
D8 0.80000001 sec  
D16 0.00020000 sec  
IN0 0.00022215 sec

==== CHANNEL f1 =====  
NUC1 1H  
P1 11.90 usec  
P2 23.80 usec  
PL1 0.35 dB  
PL1W 19.76737595 W  
SFO1 500.1321506 MHz

==== GRADIENT CHANNEL =====  
GPNAM1 SINE.100  
GPNAM2 SINE.100  
GPZ1 40.00 %  
GPZ2 -40.00 %  
P16 1000.00 usec  
ND0 1  
TD 256  
SFO1 500.1322 MHz  
FIDRES 17.582771 Hz  
SW 9.000 ppm  
FnMODE States-TPPI  
SI 1024  
SF 500.1300120 MHz  
WDW QSINE  
SSB 2  
LB 0.00 Hz  
GB 0  
PC 1.00  
SI 1024  
MC2 States-TPPI  
SF 500.1300120 MHz  
WDW QSINE  
SSB 2  
LB 0.00 Hz  
GB 0

+TOF MS: 0.533 to 1.500 min from 110429ESIA cf42-23.wiff  
a=3.55956354589842450e-004, t0=7.96575916585934460e+001

Max. 2.1 counts.

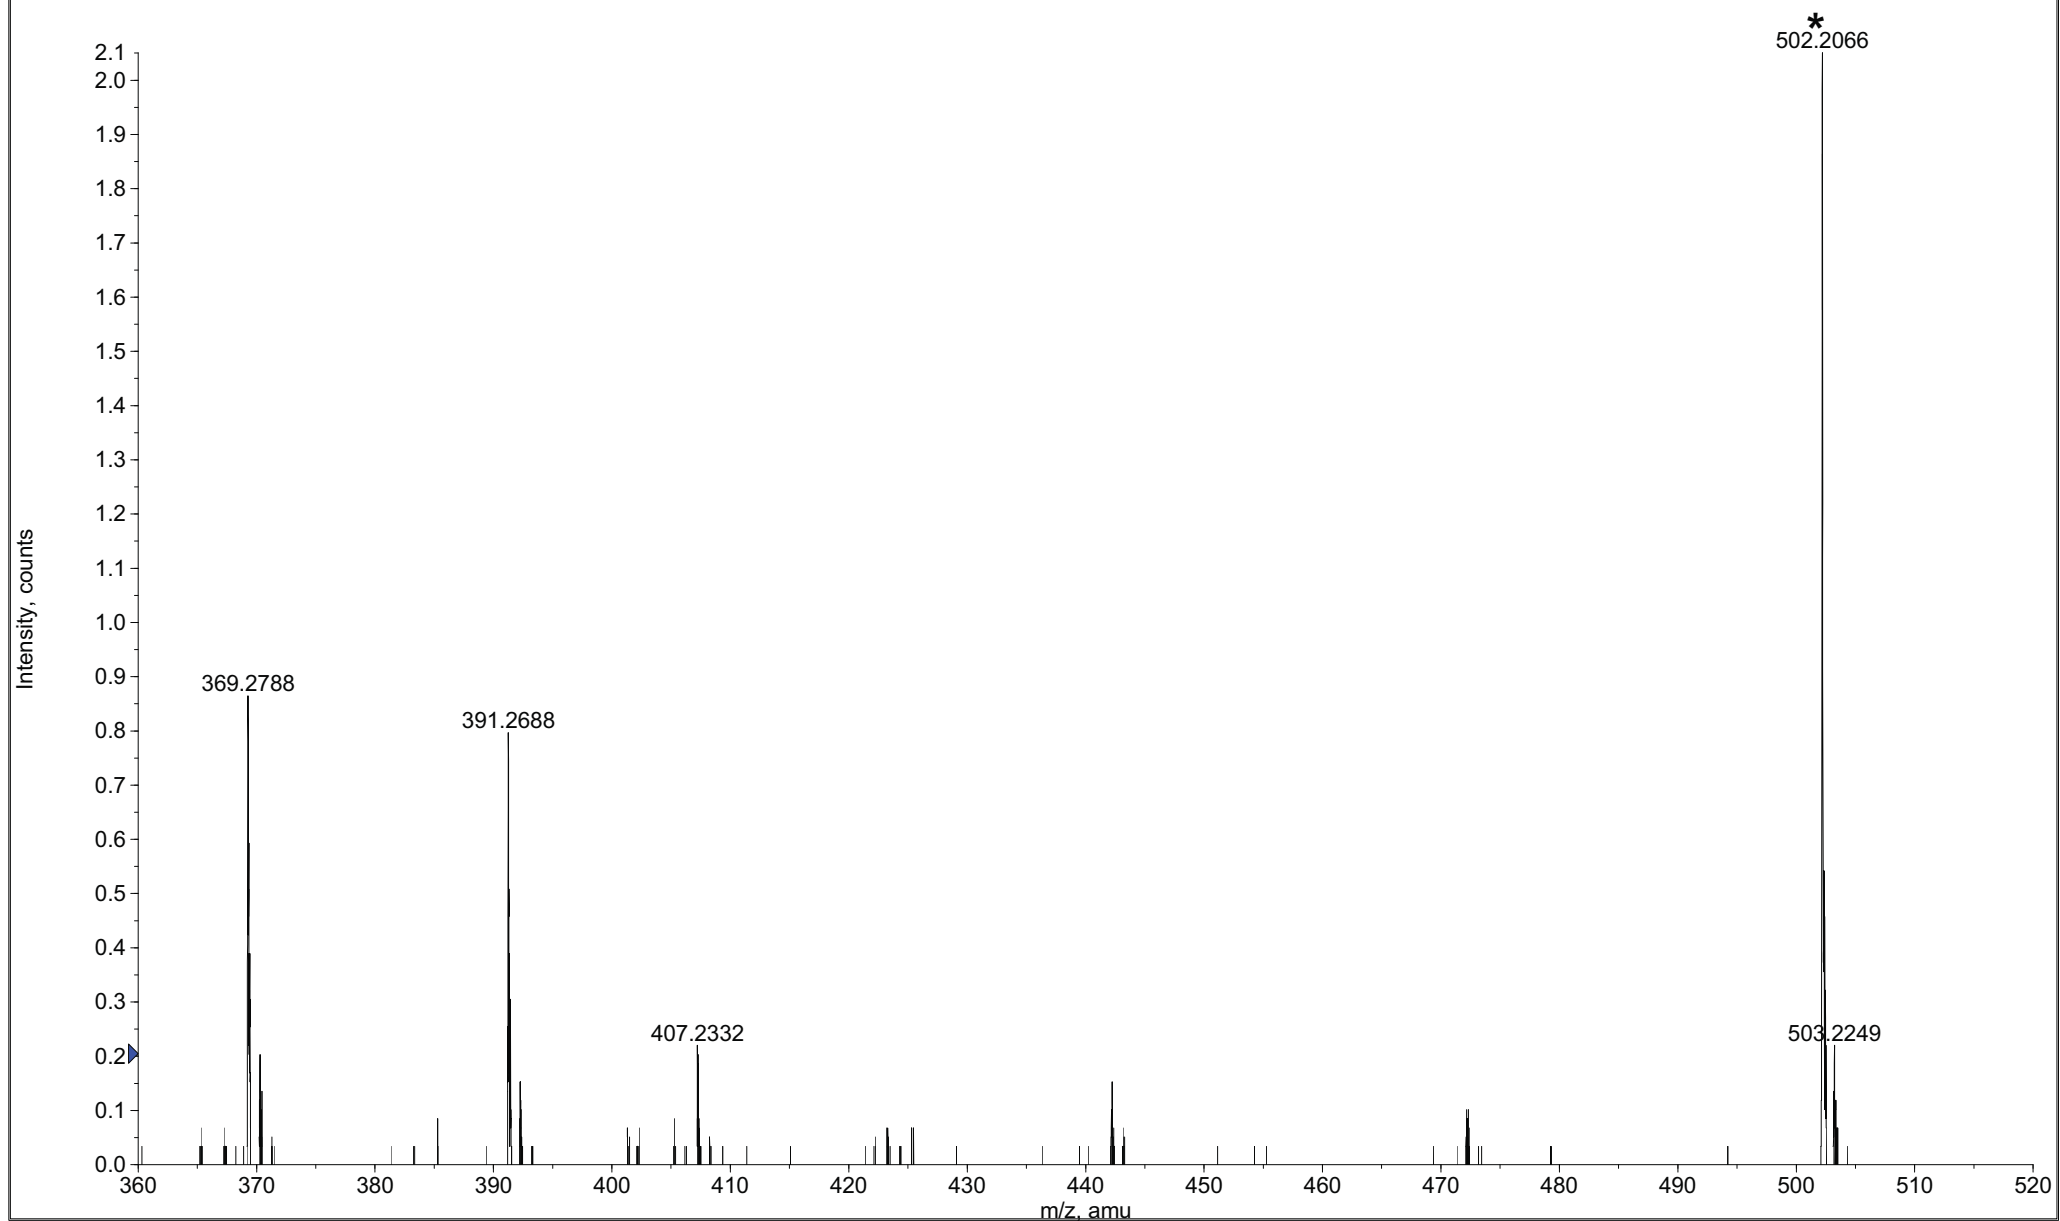

cf42-2

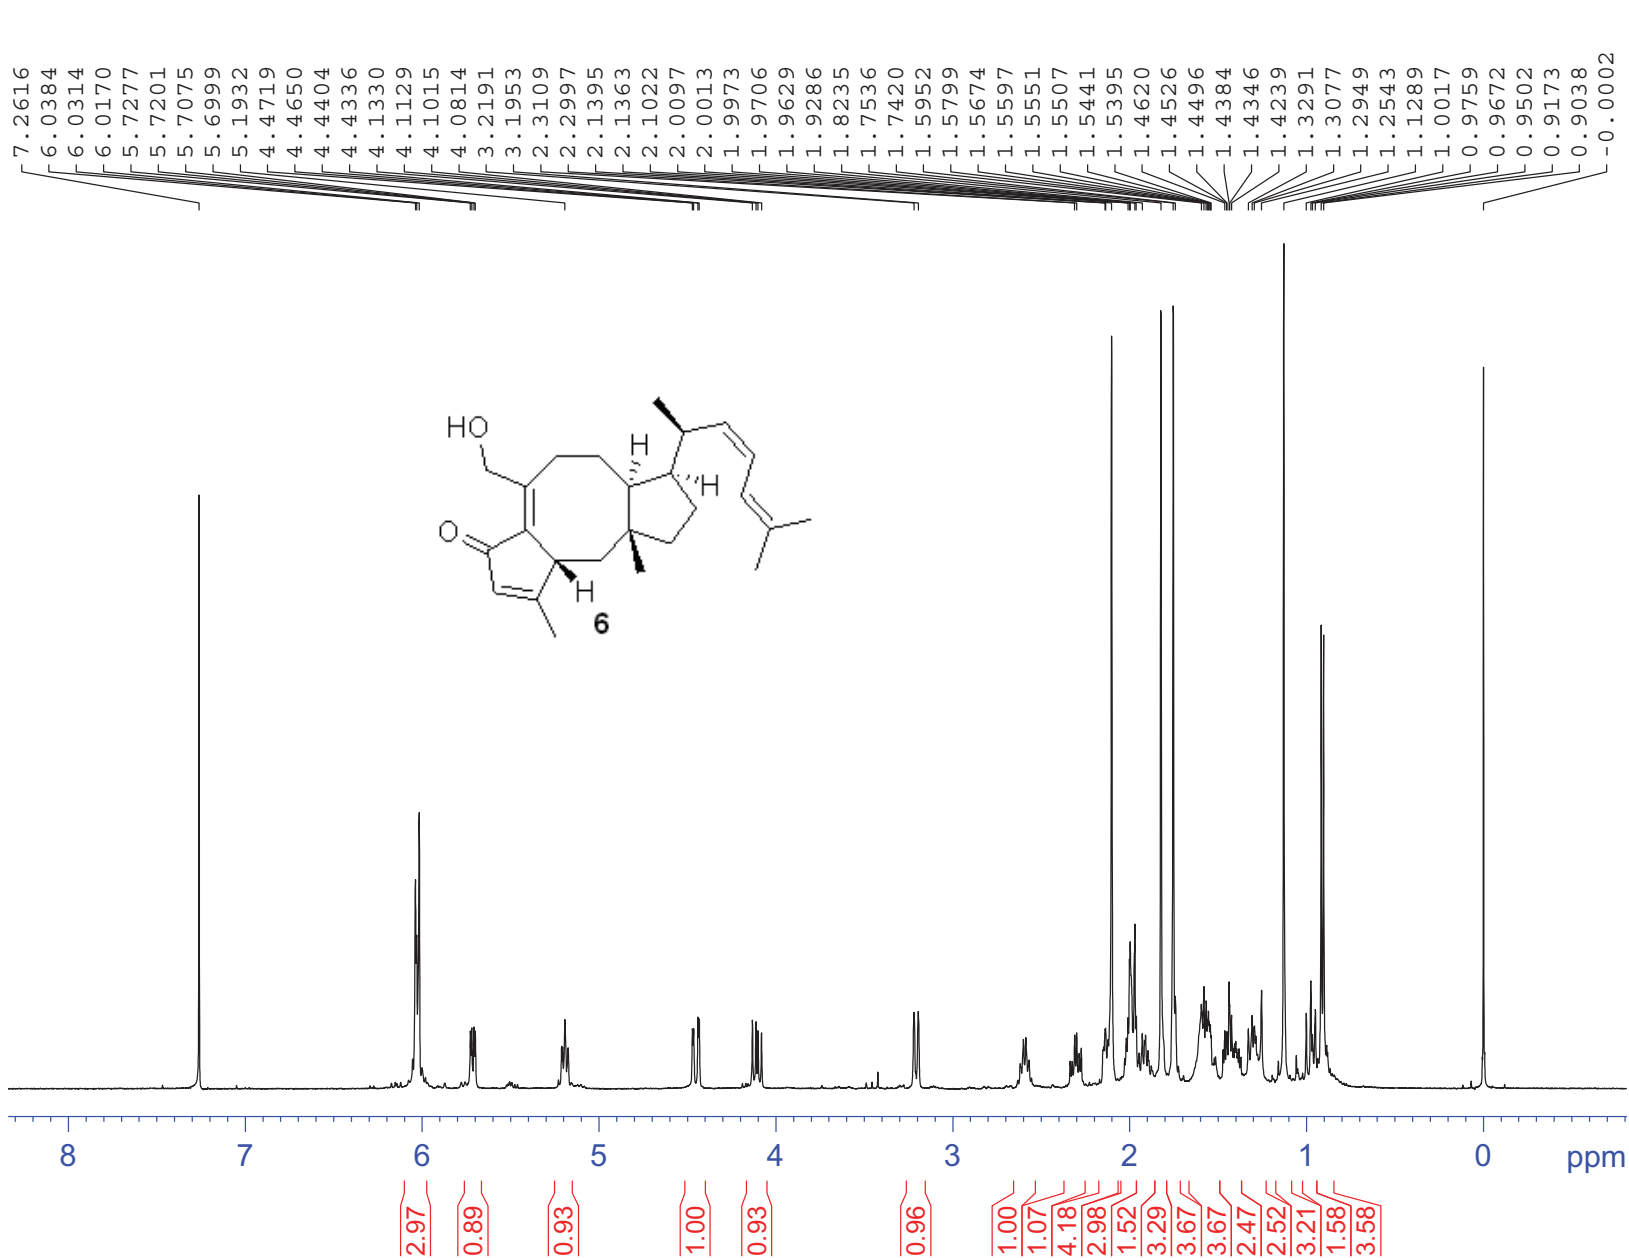

```
NAME 101222
EXPNO 6
PROCNO 1
Date_ 20101222
Time 11.00
INSTRUM spect
PROBHD 5 mm PABBO BB-
PULPROG zg30
TD 65536
SOLVENT CDCl3
NS 8
DS 0
SWH 10330.578 Hz
FIDRES 0.157632 Hz
AQ 3.1719923 sec
RG 144
DW 48.400 usec
DE 6.50 usec
TE 298.1 K
D1 1.00000000 sec
TD0 1

===== CHANNEL f1 =====
NUC1 1H
P1 11.90 usec
PL1 0.35 dB
PL1W 19.76737595 W
SFO1 500.1330885 MHz
SI 32768
SF 500.1300126 MHz
WDW EM
SSB 0
LB 0.30 Hz
GB 0
PC 1.00
```

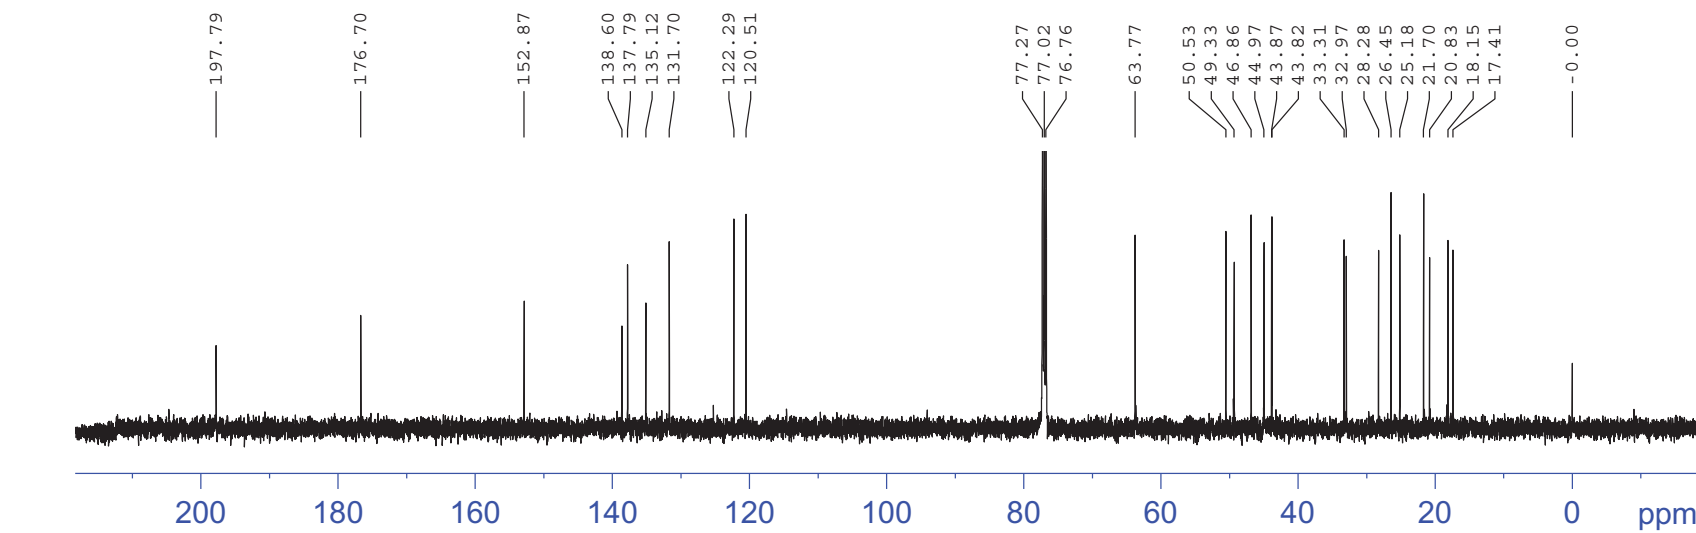

dept90

```

NAME      101222
EXPNO    7
PROCNO   7
Date_    20101222
Time     11.08
INSTRUM  spect
PROBHD   5 mm PABBO BB-
PULPROG  zgpg30
TD        65536
SOLVENT  CDCl3
NS        4
DS        4
SWH      29761.904 Hz
FIDRES   0.454113 Hz
AQ       1.1010548 sec
RG        203
DW       16.800 usec
DE       6.50 usec
TE       298.1 K
D1       2.0000000 sec
D11      0.0300000 sec
TD0      1
----- CHANNEL f1 -----
NUC1      13C
P1       10.04 usec
PL1      -1.00 dB
PL1W     106.25253296 W
SFO1     125.7703643 MHz
----- CHANNEL f2 -----
CHDPRG2  waltz16
NUC2      1H
PCPD2    80.00 usec
PL2       0.35 dB
PL12     16.90 dB
PL13     17.00 dB
PL2W     19.76737595 W
PL12W    0.43747079 W
PL13W    0.42751271 W
SFO2     500.1320005 MHz
SI        32768
SF       125.7577890 MHz
WDW      EM
SSB      0
LB       1.00 Hz
GB       0
PC       1.40
    
```

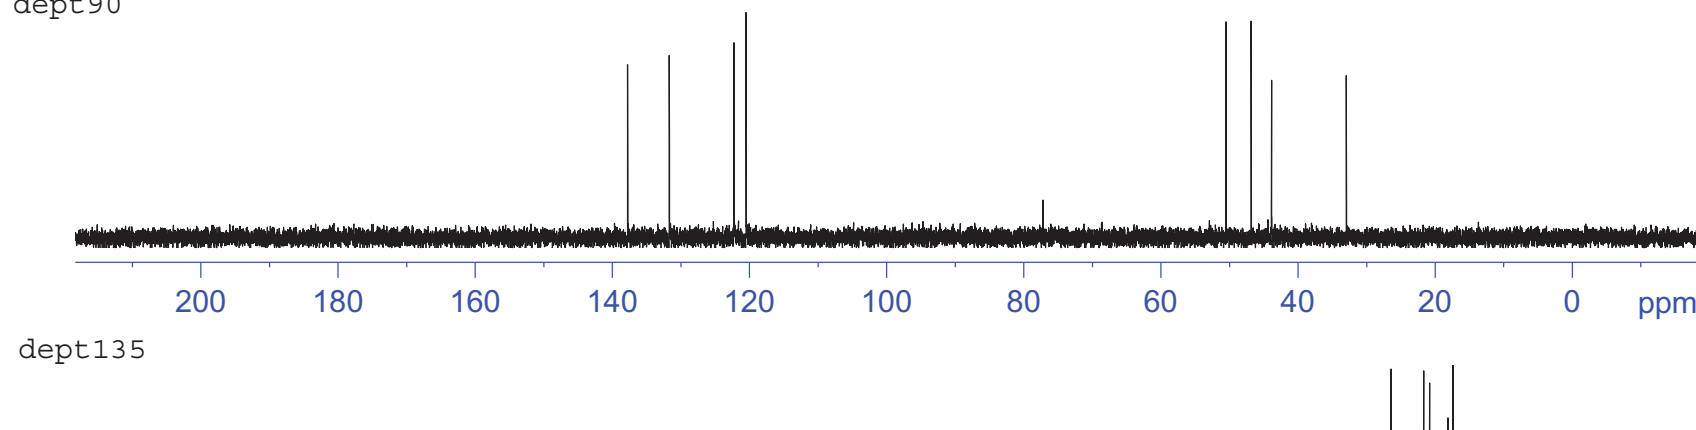

dept135

```

NAME      101222
EXPNO    9
PROCNO   9
Date_    20101222
Time     12.27
INSTRUM  spect
PROBHD   5 mm PABBO BB-
PULPROG  zgpg30
TD        65536
SOLVENT  CDCl3
NS        4
DS        4
SWH      29761.904 Hz
FIDRES   0.454113 Hz
AQ       1.1010548 sec
RG        203
DW       16.800 usec
DE       6.50 usec
TE       298.0 K
D1       145.0000000 sec
D2       2.0000000 sec
D12      0.00344828 sec
D13      0.00002000 sec
TD0      1
----- CHANNEL f1 -----
NUC1      13C
P1       10.04 usec
PL1      20.08 usec
PL1W     106.25253296 W
SFO1     125.7703643 MHz
----- CHANNEL f2 -----
CHDPRG2  waltz16
NUC2      1H
PCPD2    13.00 usec
P4       26.00 usec
PCPD2    80.00 usec
PL2       0.35 dB
PL12     16.90 dB
PL13     17.00 dB
PL2W     19.76737595 W
PL12W    0.43747079 W
SFO2     500.1320005 MHz
SI        32768
SF       125.7577890 MHz
WDW      EM
SSB      0
LB       1.00 Hz
GB       0
PC       1.40
    
```

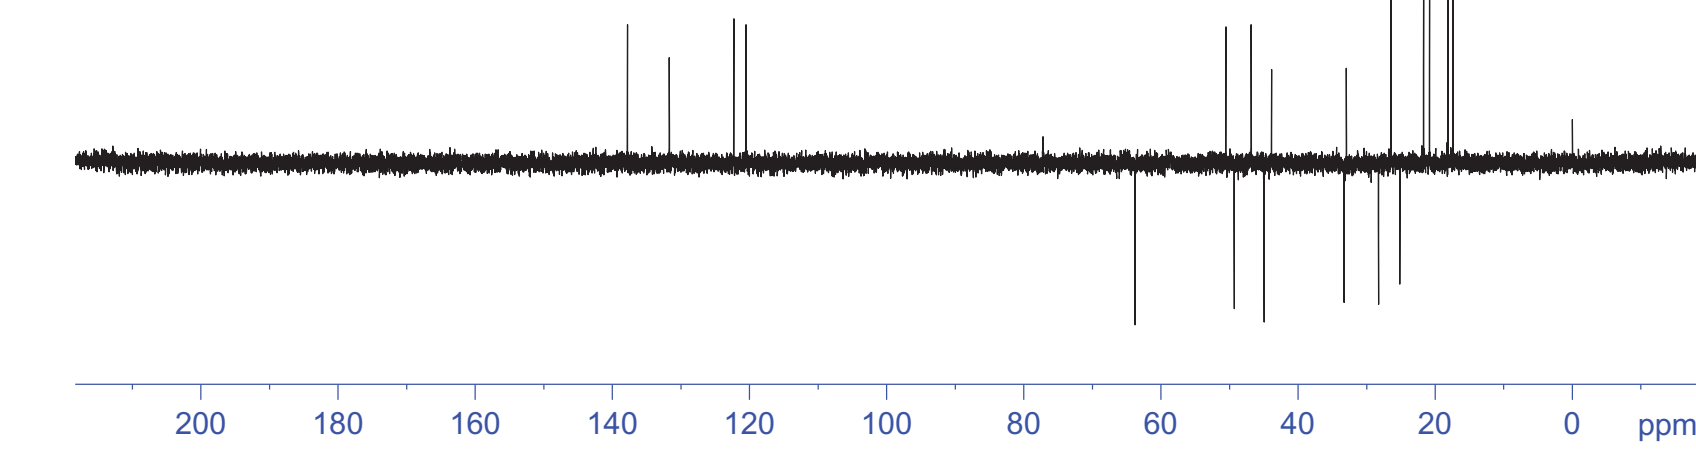

```

NAME      101222
EXPNO    8
PROCNO   8
Date_    20101222
Time     12.14
INSTRUM  spect
PROBHD   5 mm PABBO BB-
PULPROG  dept135
TD        65536
SOLVENT  CDCl3
NS        4
DS        4
SWH      29761.904 Hz
FIDRES   0.454113 Hz
AQ       1.1010548 sec
RG        203
DW       16.800 usec
DE       6.50 usec
TE       298.1 K
D1       145.0000000 sec
D2       2.0000000 sec
D12      0.00344828 sec
D13      0.00002000 sec
TD0      1
----- CHANNEL f1 -----
NUC1      13C
P1       10.04 usec
P2       20.08 usec
PL1      -1.00 dB
PL1W     106.25253296 W
SFO1     125.7703643 MHz
----- CHANNEL f2 -----
CHDPRG2  waltz16
NUC2      1H
P3       13.00 usec
P4       26.00 usec
PCPD2    80.00 usec
PL2       0.35 dB
PL12     16.90 dB
PL13     17.00 dB
PL2W     19.76737595 W
PL12W    0.43747079 W
SFO2     500.1320005 MHz
SI        32768
SF       125.7577890 MHz
WDW      EM
SSB      0
LB       1.00 Hz
GB       0
PC       1.40
    
```

hsqc\_cf42-2

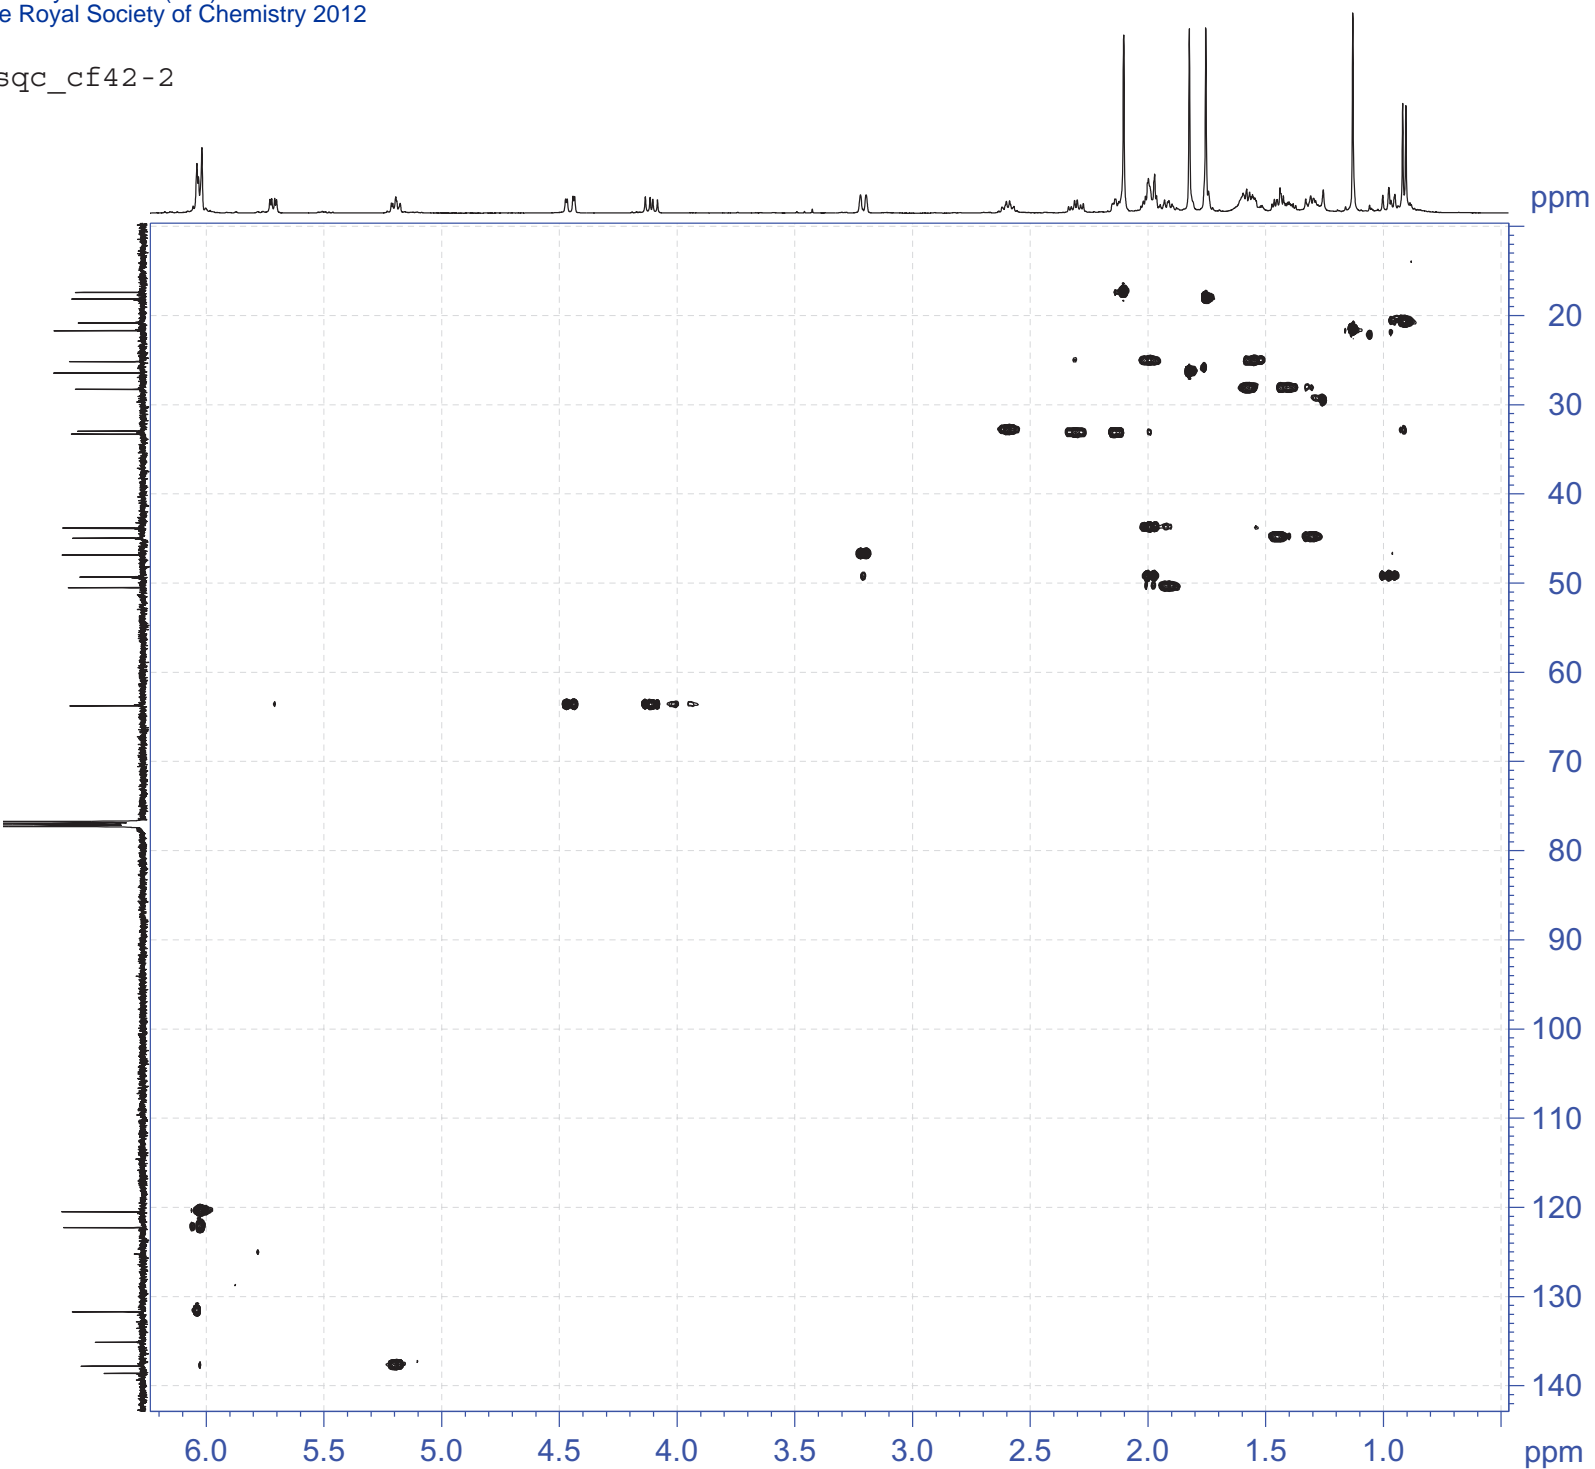

```
NAME 101227
EXPNO 8
PROCNO 1
Date_ 20101227
Time 17.57
INSTRUM spect
PROBHD 5 mm PABBO BB-
PULPROG hsqcetgpsisp2
TD 2048
SOLVENT CDCl3
NS 16
DS 32
SWH 4504.504 Hz
FIDRES 2.199465 Hz
AQ 0.2273780 sec
RG 203
DW 111.000 usec
DE 6.50 usec
TE 298.1 K
CNST2 145.0000000
D0 0.0000300 sec
D1 2.0000000 sec
D4 0.00172414 sec
D11 0.03000000 sec
D16 0.00020000 sec
D24 0.00086207 sec
INO 0.00002400 sec
ZGOPTNS

===== CHANNEL f1 =====
NUC1 1H
P1 11.90 usec
P2 23.80 usec
P28 0.00 usec
PL1 0.35 dB
PL1W 19.76737595 W
SFO1 500.1320005 MHz

===== CHANNEL f2 =====
CPDPRG2 garp
NUC2 13C
P3 11.90 usec
P4 23.80 usec
P14 500.00 usec
PCPD2 70.00 usec
PL0 120.00 dB
PL2 1.00 dB
PL12 16.39 dB
PLOW 0.00000000 W
PL2W 67.04081726 W
PL12W 1.93793559 W
SFO2 125.7678496 MHz
SP3 7.65 dB
SPNAM3 Crp60,0.5,20.1
SPOAL3 0.500
SPOFFS3 0.00 Hz

===== GRADIENT CHANNEL =====
GPNAM1 SINE.100
GPNAM2 SINE.100
GPNAM3 SINE.100
GPNAM4 SINE.100
GPZ1 80.00 %
GPZ2 20.10 %
GPZ3 11.00 %
GPZ4 -5.00 %
P16 1000.00 usec
P19 600.00 usec
NDO 2
TD 256
SFO1 125.7678 MHz
FIDRES 81.380646 Hz
SW 165.650 ppm
FnMODE Echo-Antiecho
SI 1024
SF 500.1300100 MHz
WDW QSINE
SSB 2
LB 0.00 Hz
GB 0
PC 1.40
SI 1024
MC2 echo-antiecho
SF 125.7578045 MHz
WDW QSINE
SSB 2
LB 0.00 Hz
GB 0
```



hmbc\_cf42-2

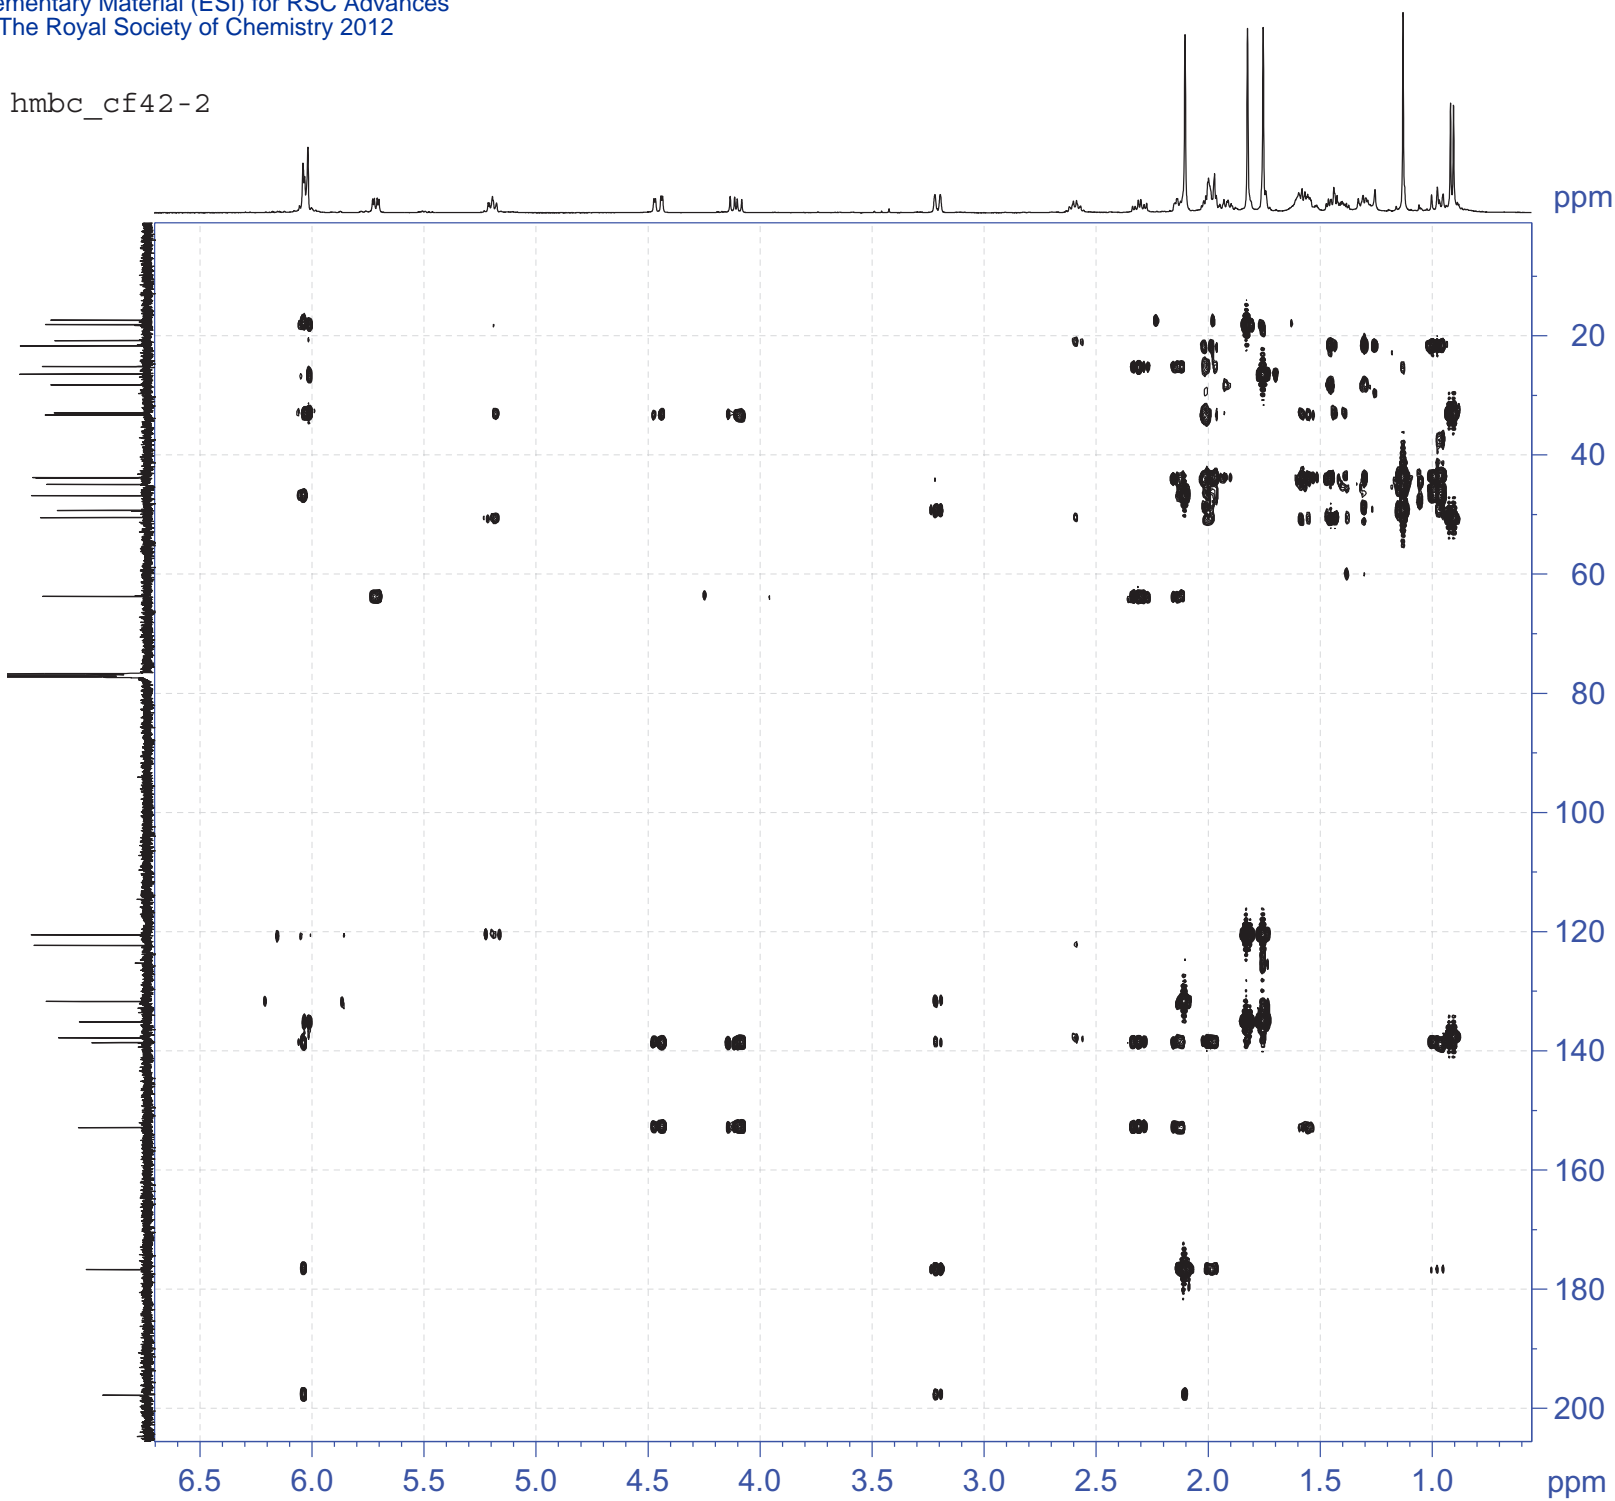

```
NAME          101227
EXPNO         9
PROCNO        1
Date_         20101227
Time_        20.31
INSTRUM       spect
PROBHD        5 mm PABBO BB-
PULPROG       hmbcetgp12nd
TD            4096
SOLVENT       CDCl3
NS            32
DS            16
SWH           4504.504 Hz
FIDRES        1.099733 Hz
AQ            0.4547060 sec
RG            203
DW            111.000 usec
DE            6.50 usec
TE            298.0 K
CNST6         120.0000000
CNST7         180.0000000
CNST13        7.0000000
CNST30        0.5981151
D0            0.00000300 sec
D1            1.50000000 sec
D6            0.07142857 sec
D16           0.00020000 sec
IN0           0.00001805 sec

===== CHANNEL f1 =====
NUC1          1H
P1            11.90 usec
P2            23.80 usec
PL1           0.35 dB
PL1W          19.76737595 W
SFO1          500.1320005 MHz

===== CHANNEL f2 =====
NUC2          13C
P3            11.90 usec
P4            2000.00 usec
PL2           1.00 dB
PL2W          67.04081726 W
SFO2          125.7703648 MHz
SP7           7.65 dB
SPNAM7        Crp60comp.4
SPOAL7        0.500
SPOFFS7       0.00 Hz

===== GRADIENT CHANNEL =====
GPNAM1        SINE.100
GPNAM3        SINE.100
GPNAM4        SINE.100
GPNAM5        SINE.100
GPZ1          80.00 %
GPZ3          15.00 %
GPZ4          -10.00 %
GPZ5          -5.00 %
P16           1000.00 usec
ND0           2
TD            256
SFO1          125.7704 MHz
FIDRES        108.083908 Hz
SW            220.000 ppm
FnMODE        Echo-Antiecho
SI            1024
SF            500.1300100 MHz
WDW           SINE
SSB           0
LB            0.00 Hz
GB            0
PC            1.40
SI            1024
MC2           echo-antiecho
SF            125.7578045 MHz
WDW           SINE
SSB           0
LB            0.00 Hz
GB            0
```

cosy\_cf42-2

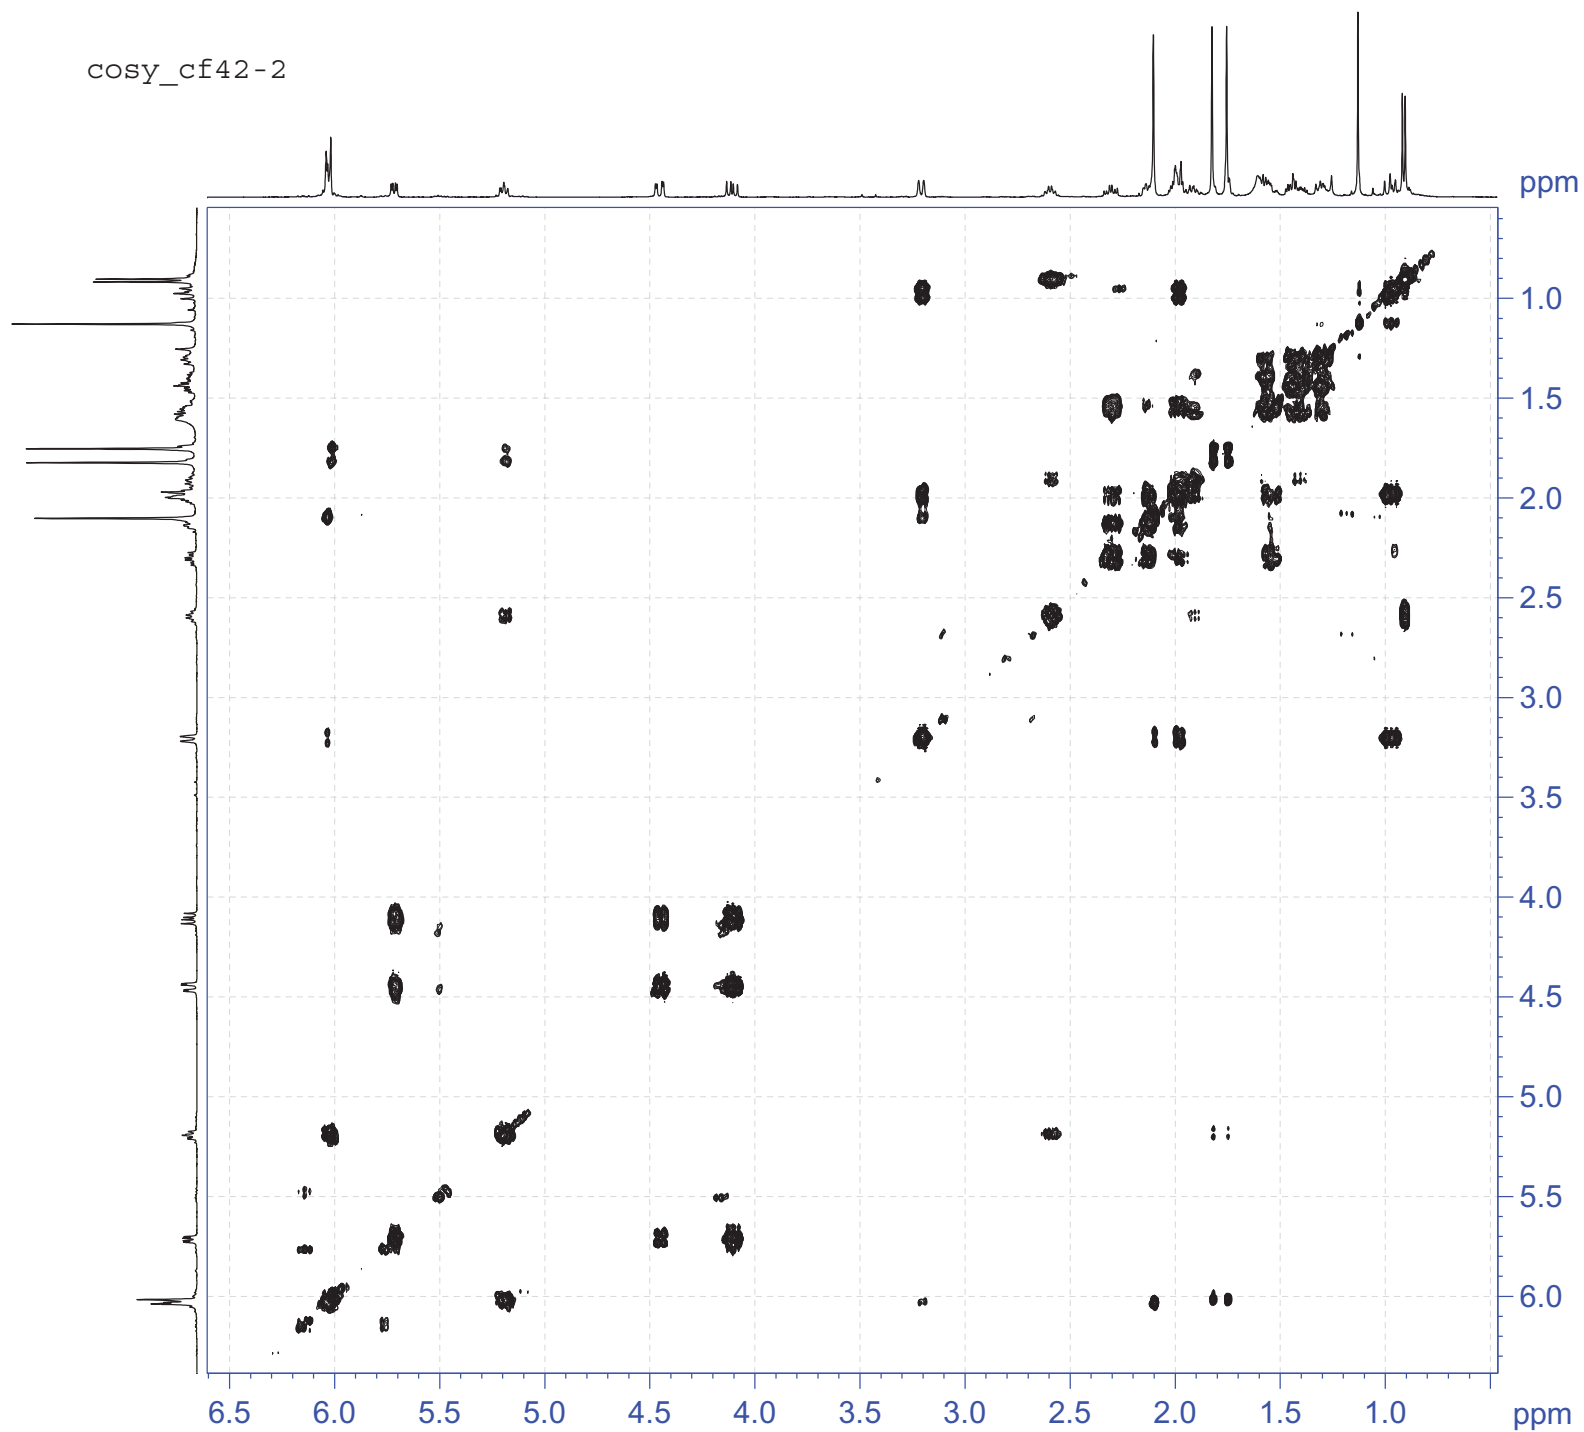

```
NAME 101227
EXPNO 7
PROCNO 1
Date_ 20101227
Time 17.16
INSTRUM spect
PROBHD 5 mm PABBO BB-
PULPROG cosygpmfqq
TD 2048
SOLVENT CDCl3
NS 4
DS 16
SWH 4504.504 Hz
FIDRES 2.199465 Hz
AQ 0.2273780 sec
RG 203
DW 111.000 usec
DE 6.50 usec
TE 298.1 K
DO 0.00000300 sec
D1 2.00000000 sec
D13 0.00000400 sec
D16 0.00020000 sec
INO 0.00022215 sec

===== CHANNEL f1 =====
NUC1 1H
P1 11.90 usec
PL1 0.35 dB
PL1W 19.76737595 W
SFO1 500.1319005 MHz

===== GRADIENT CHANNEL =====
GPNAM1 SINE.100
GPNAM2 SINE.100
GPNAM3 SINE.100
GPZ1 16.00 %
GPZ2 12.00 %
GPZ3 40.00 %
P16 1000.00 usec
ND0 1
TD 256
SFO1 500.1319 MHz
FIDRES 17.582762 Hz
SW 9.000 ppm
FnMODE QF
SI 1024
SF 500.1300137 MHz
WDW SINE
SSB 0
LB 0.00 Hz
GB 0
PC 1.40
SI 1024
MC2 QF
SF 500.1300137 MHz
WDW SINE
SSB 0
LB 0.00 Hz
GB 0
```

noesy\_cf42-2

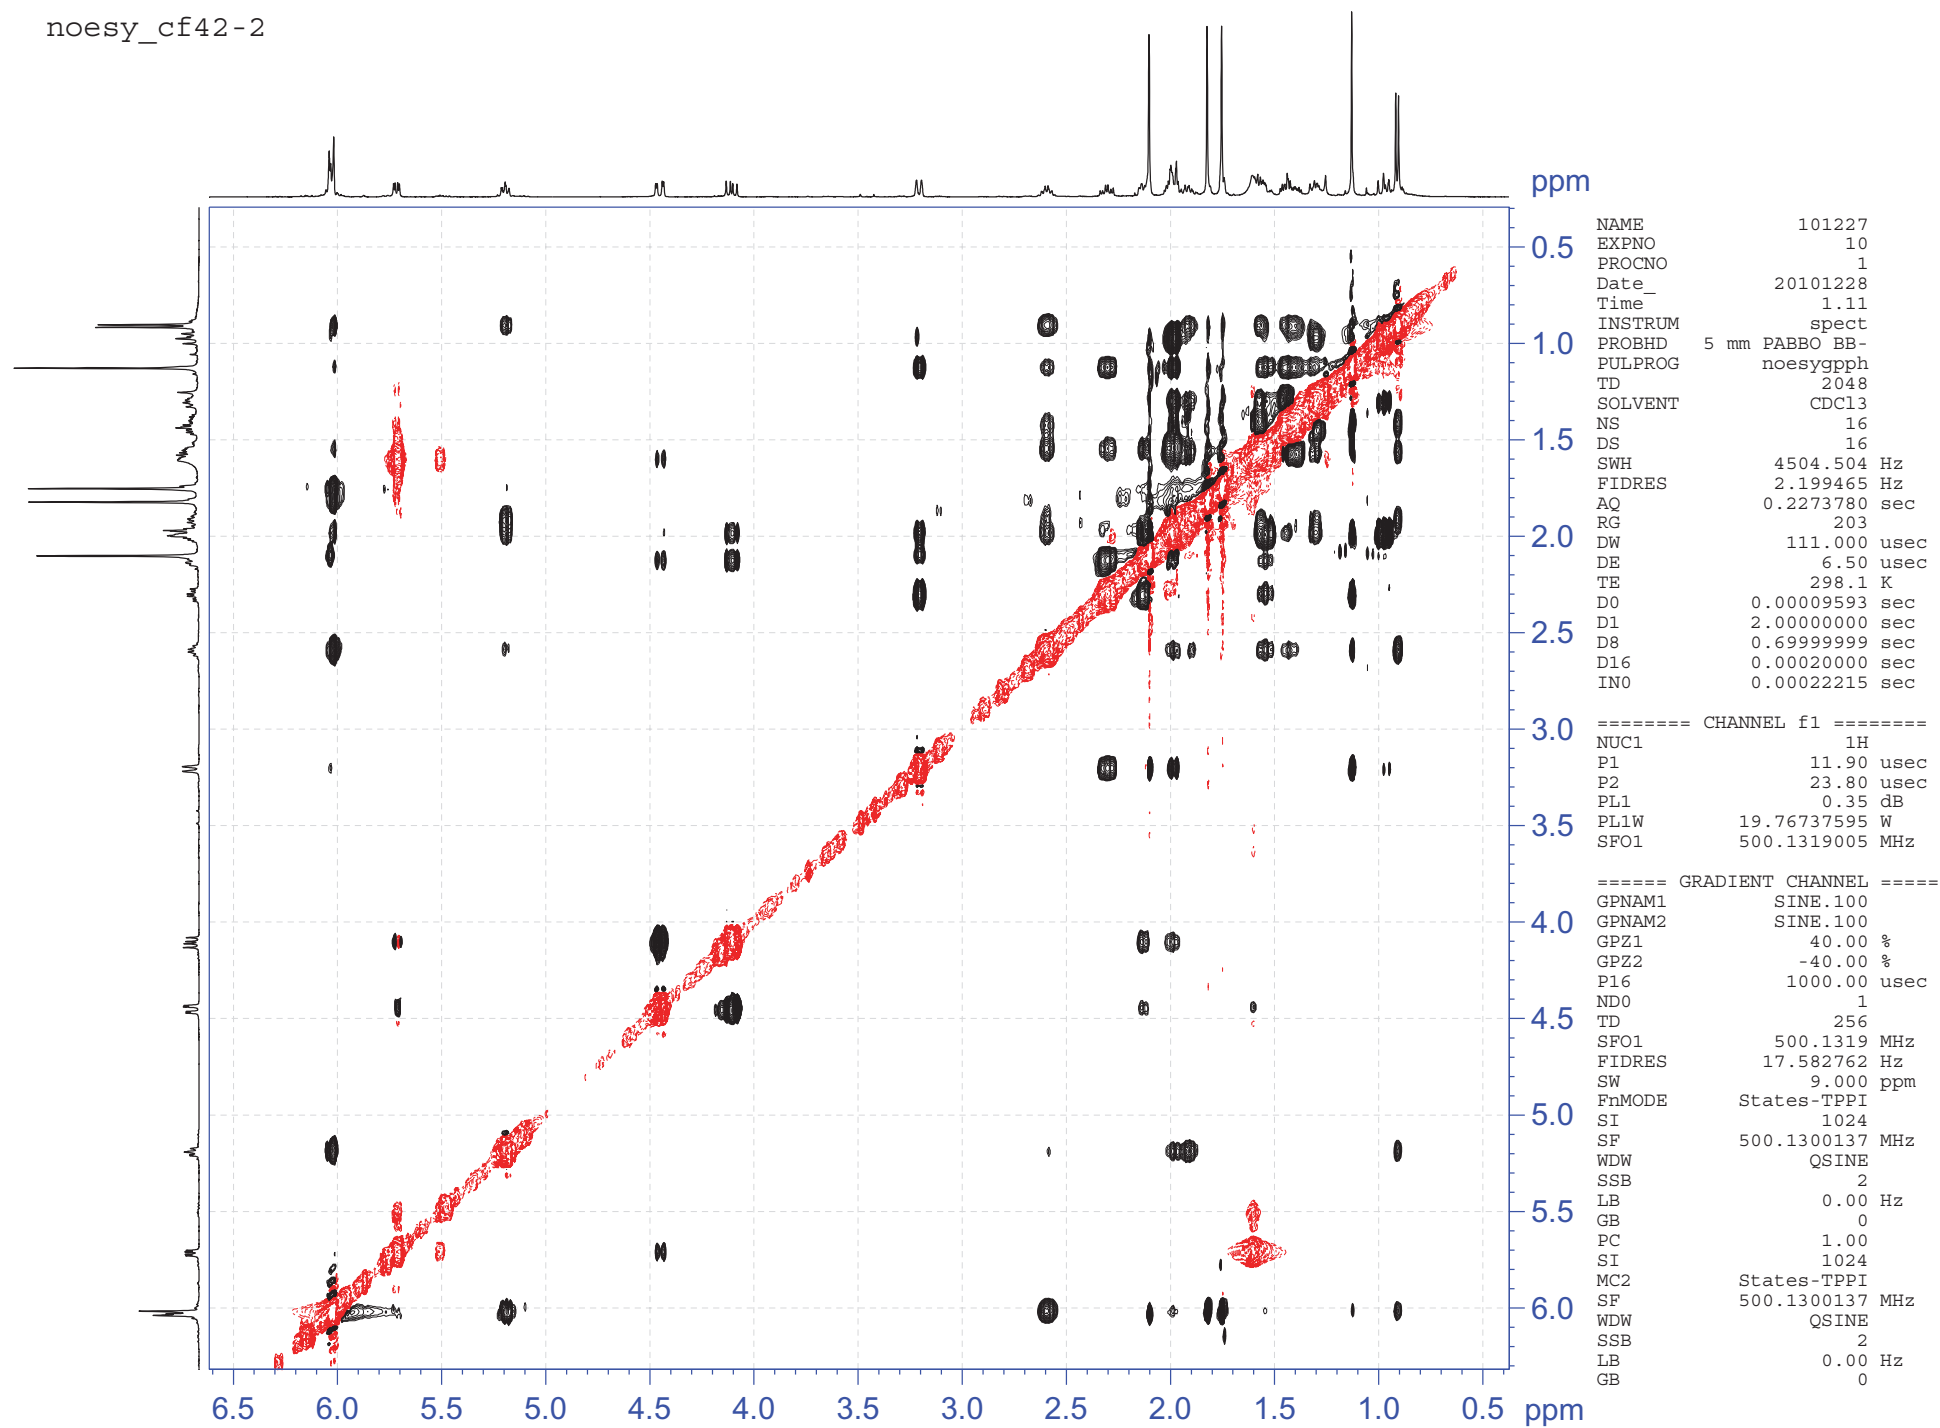

## Elemental Composition Report

## Single Mass Analysis (displaying only valid results)

Tolerance = 10.0 PPM / DBE: min = 0.5, max = 40.0

Selected filters: None

Monoisotopic Mass, Odd and Even Electron Ions

43 formula(e) evaluated with 1 results within limits (up to 51 closest results for each mass)

Elements Used:

C: 0-200 H: 0-400 O: 0-9

cf42-2

08:35:46 14-Jan-2011

Voltage EI+

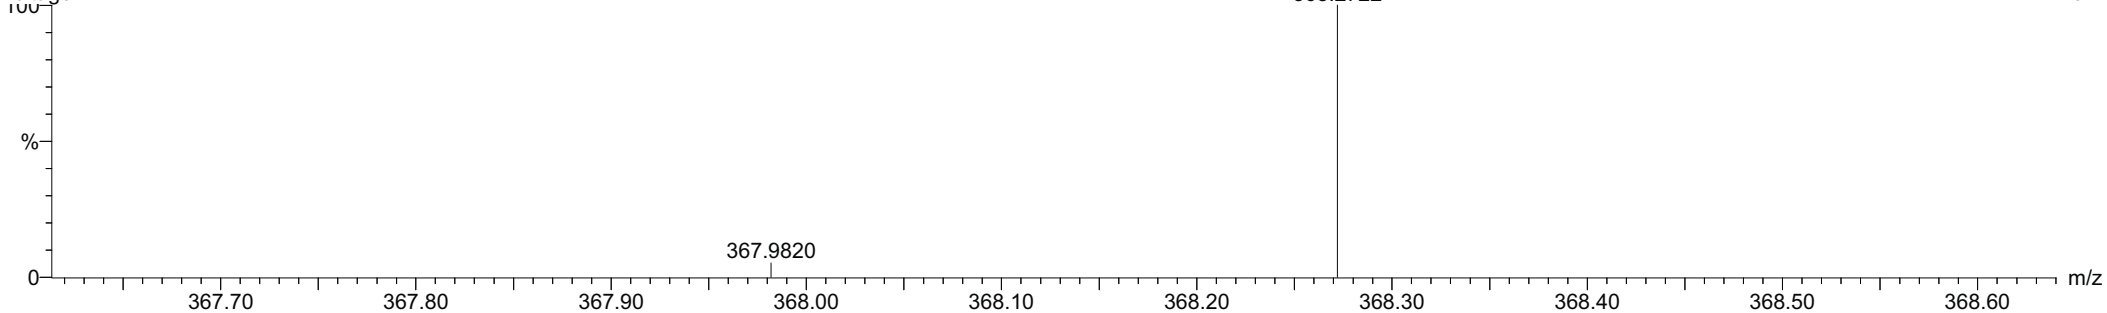

Minimum: 0.5  
Maximum: 100.0 10.0 40.0

| Mass     | Calc. Mass | mDa | PPM | DBE | i-FIT     | Formula    |
|----------|------------|-----|-----|-----|-----------|------------|
| 368.2722 | 368.2715   | 0.7 | 1.9 | 8.0 | 5546286.0 | C25 H36 O2 |

cf42-50

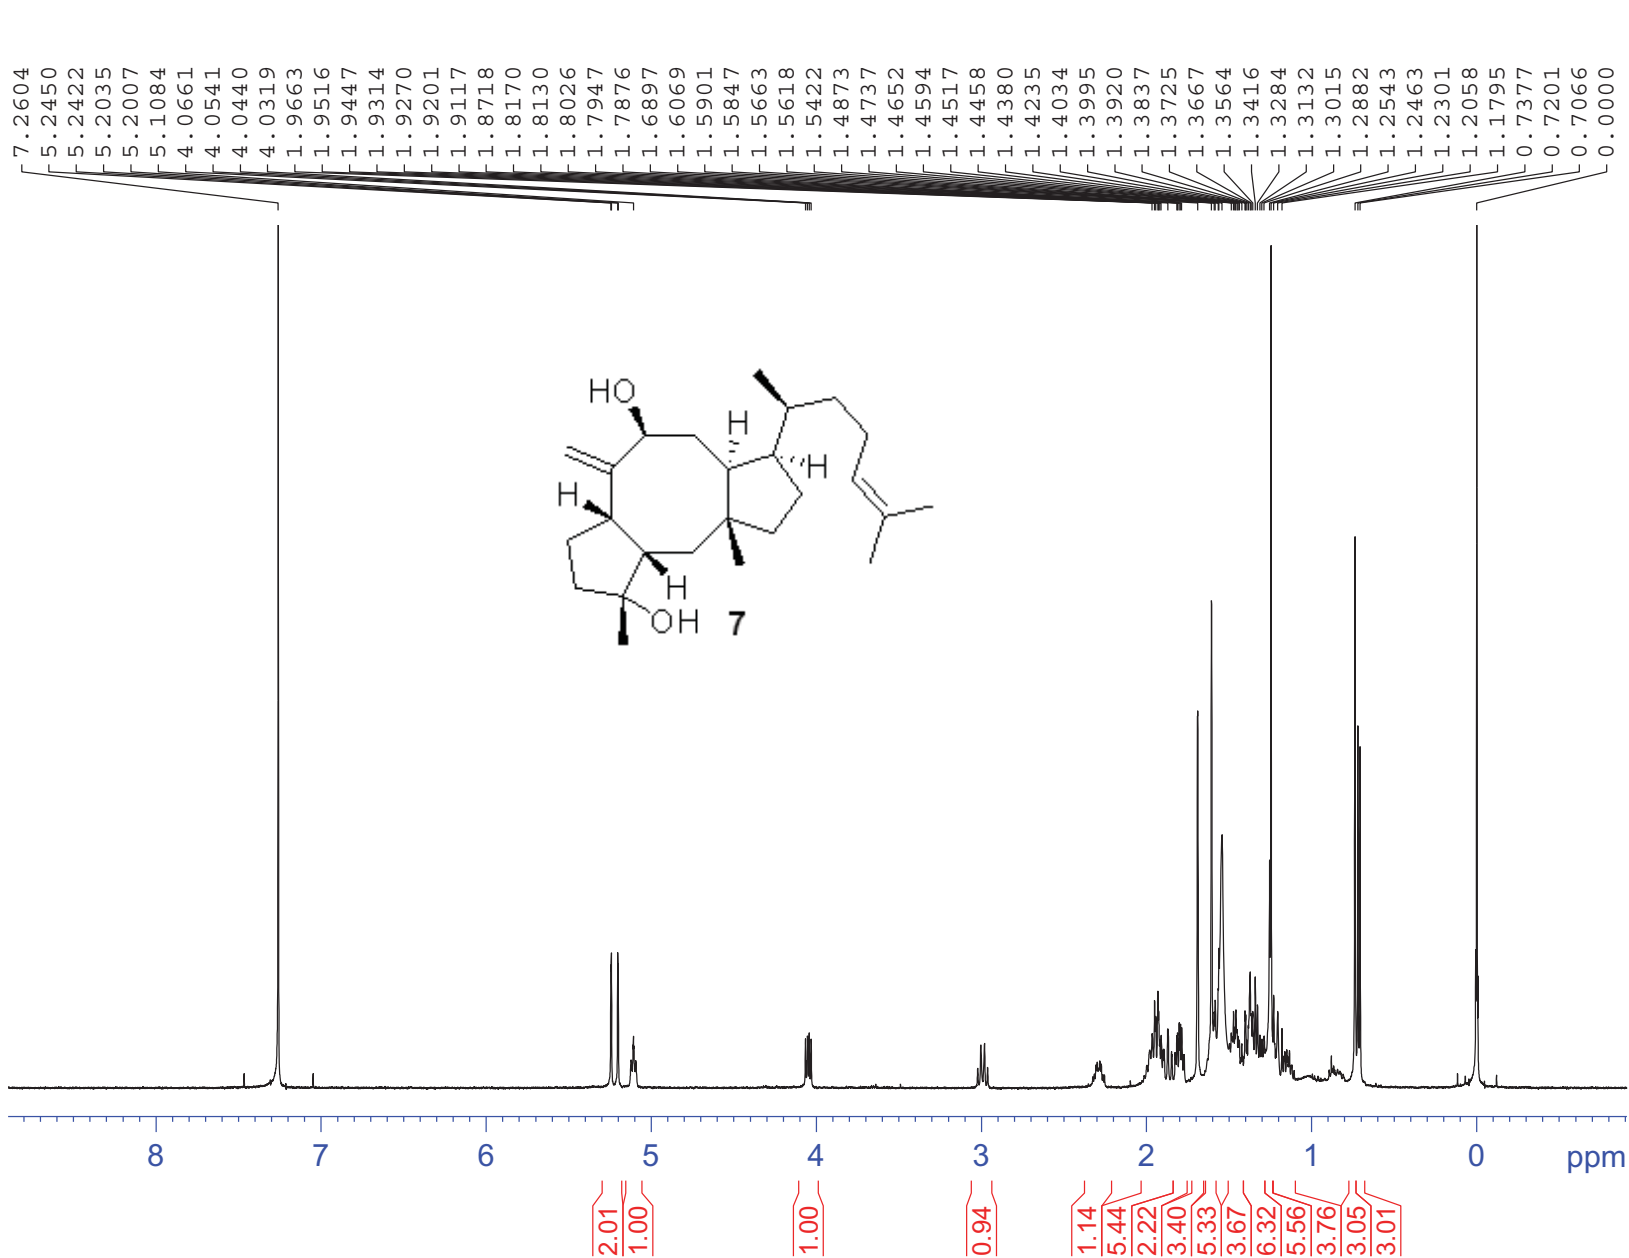

```

NAME          110601
EXPNO         25
PROCNO        1
Date_         20110603
Time_         8.47
INSTRUM       spect
PROBHD        5 mm PABBO BB-
PULPROG       zg30
TD            65536
SOLVENT       CDCl3
NS            8
DS            0
SWH           10330.578 Hz
FIDRES        0.157632 Hz
AQ            3.1719923 sec
RG            203
DW            48.400 usec
DE            6.50 usec
TE            298.0 K
D1            1.00000000 sec
TD0           1

===== CHANNEL f1 =====
NUC1          1H
P1            11.90 usec
PL1           0.35 dB
PL1W          19.76737595 W
SFO1          500.1330885 MHz
SI            32768
SF            500.1300135 MHz
WDW           EM
SSB           0
LB            0.30 Hz
GB            0
PC            1.00
    
```

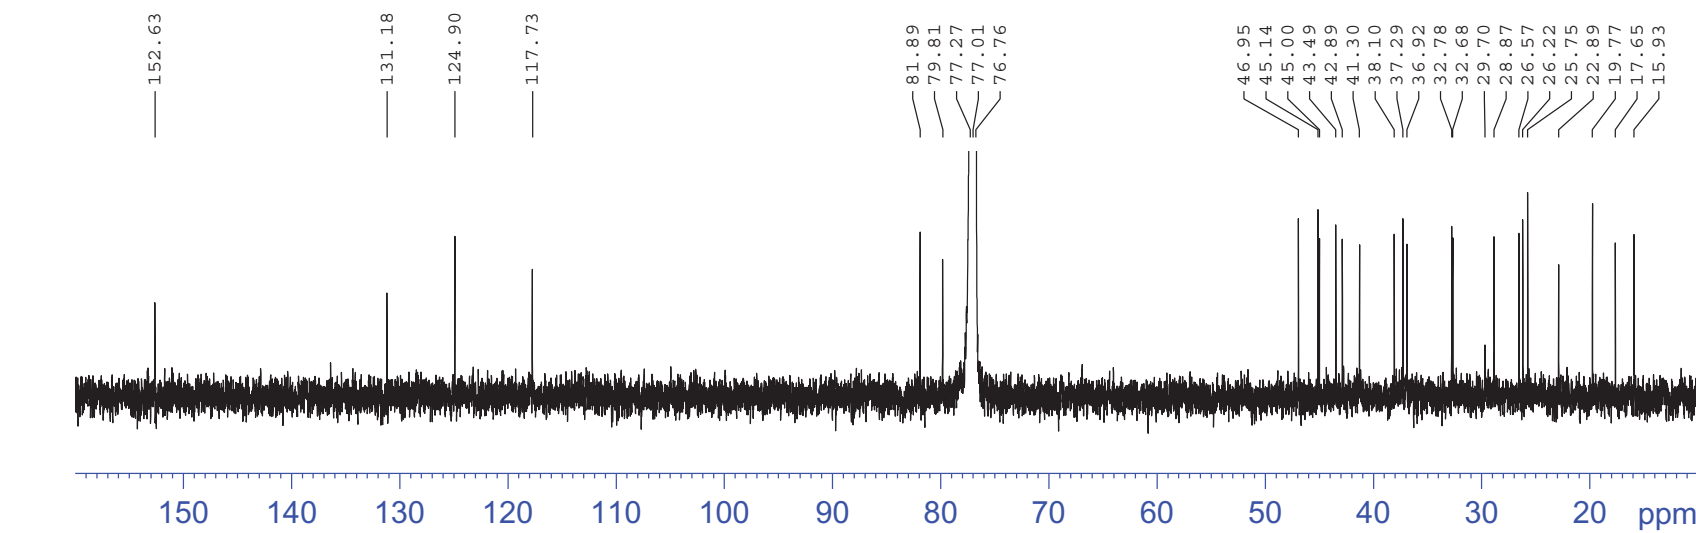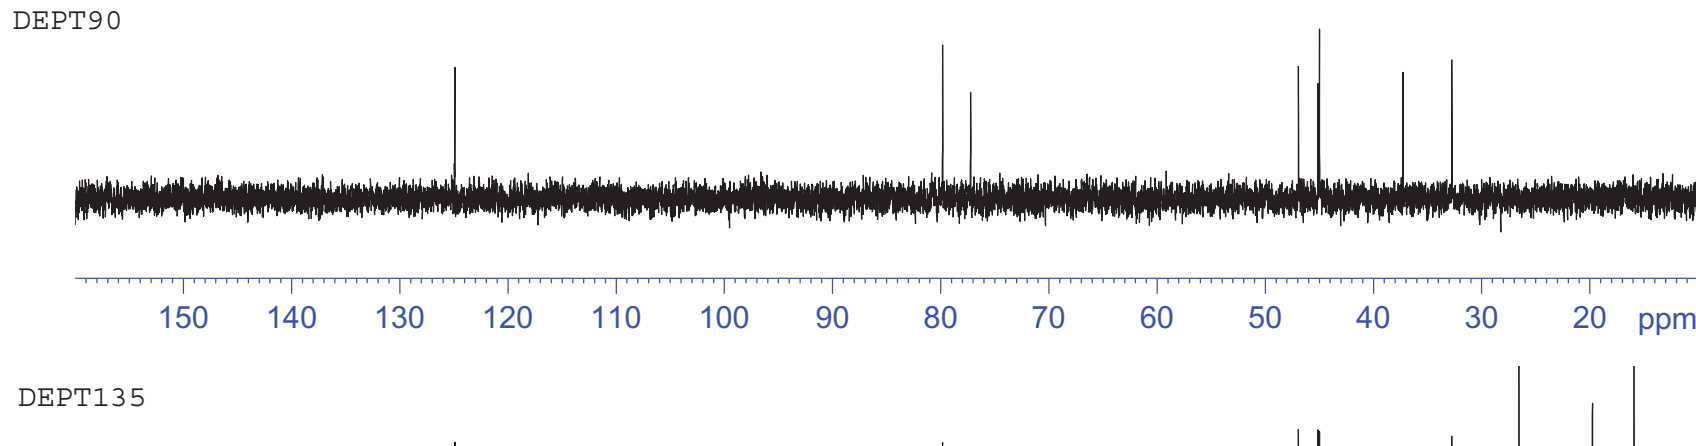

```
NAME 110614
EXPNO 5
PROCNO 1
Date_ 20110615
Time 10.00
INSTRUM spect
PROBHD 5 mm PABBO BB-
PULPROG zgpg30
TD 65536
SOLVENT CDCl3
NS 4
DS 4
SWH 29761.904 Hz
FIDRES 0.454131 Hz
AQ 1.1010548 sec
RG 203
DW 16.800 usec
DE 6.50 usec
TE 298.0 K
D1 2.0000000 sec
D11 0.0300000 sec
TD0 1
----- CHANNEL f1 -----
NUC1 13C
P1 10.04 usec
PL1 -1.00 dB
PL1W 106.25253296 MHz
SFO1 125.7703643 MHz
----- CHANNEL f2 -----
CHPROG2 waltz16
NUC2 1H
PCP2 80.00 usec
P4 26.00 usec
PCP2 80.00 usec
PL2 0.35 dB
PL12 16.90 dB
PL2W 19.76737595 MHz
PL12W 0.43747079 MHz
PL13W 0.42751271 MHz
SFO2 500.1320005 MHz
SI 32768
SF 125.7577890 MHz
WDW EM
SSB 0
LB 1.00 Hz
GB 0
PC 1.40
----- CHANNEL f1 -----
NAME 110614
EXPNO 7
PROCNO 1
Date_ 20110615
Time 13.25
INSTRUM spect
PROBHD 5 mm PABBO BB-
PULPROG dept135
TD 65536
SOLVENT CDCl3
NS 4
DS 4
SWH 29761.904 Hz
FIDRES 0.454131 Hz
AQ 1.1010548 sec
RG 203
DW 16.800 usec
DE 6.50 usec
TE 298.0 K
CNST2 145.0000000
D1 2.0000000 sec
D2 0.00344828 sec
D12 0.00002000 sec
TD0 1
----- CHANNEL f1 -----
NUC1 13C
P1 10.04 usec
P2 20.08 usec
PL1 -1.00 dB
PL2 20.08 usec
PL1W 106.25253296 MHz
SFO1 125.7703643 MHz
----- CHANNEL f2 -----
CHPROG2 waltz16
NUC2 1H
P3 13.00 usec
P4 26.00 usec
PCP2 80.00 usec
PL2 0.35 dB
PL12 16.90 dB
PL2W 19.76737595 MHz
PL12W 0.43747079 MHz
SFO2 500.1320005 MHz
SI 32768
SF 125.7577890 MHz
WDW EM
SSB 0
LB 1.00 Hz
GB 0
PC 1.40
----- CHANNEL f1 -----
NAME 110614
EXPNO 6
PROCNO 1
Date_ 20110615
Time 12.11
INSTRUM spect
PROBHD 5 mm PABBO BB-
PULPROG dept90
TD 65536
SOLVENT CDCl3
NS 4
DS 4
SWH 29761.904 Hz
FIDRES 0.454131 Hz
AQ 1.1010548 sec
RG 203
DW 16.800 usec
DE 6.50 usec
TE 298.0 K
CNST2 145.0000000
D1 2.0000000 sec
D2 0.00344828 sec
D12 0.00002000 sec
TD0 1
----- CHANNEL f1 -----
NUC1 13C
P1 10.04 usec
P2 20.08 usec
PL1 -1.00 dB
PL2 20.08 usec
PL1W 106.25253296 MHz
SFO1 125.7703643 MHz
----- CHANNEL f2 -----
CHPROG2 waltz16
NUC2 1H
P3 13.00 usec
P4 26.00 usec
PCP2 80.00 usec
PL2 0.35 dB
PL12 16.90 dB
PL2W 19.76737595 MHz
PL12W 0.43747079 MHz
SFO2 500.1320005 MHz
SI 32768
SF 125.7577890 MHz
WDW EM
SSB 0
LB 1.00 Hz
GB 0
PC 1.40
```

hsqc\_cf42-50

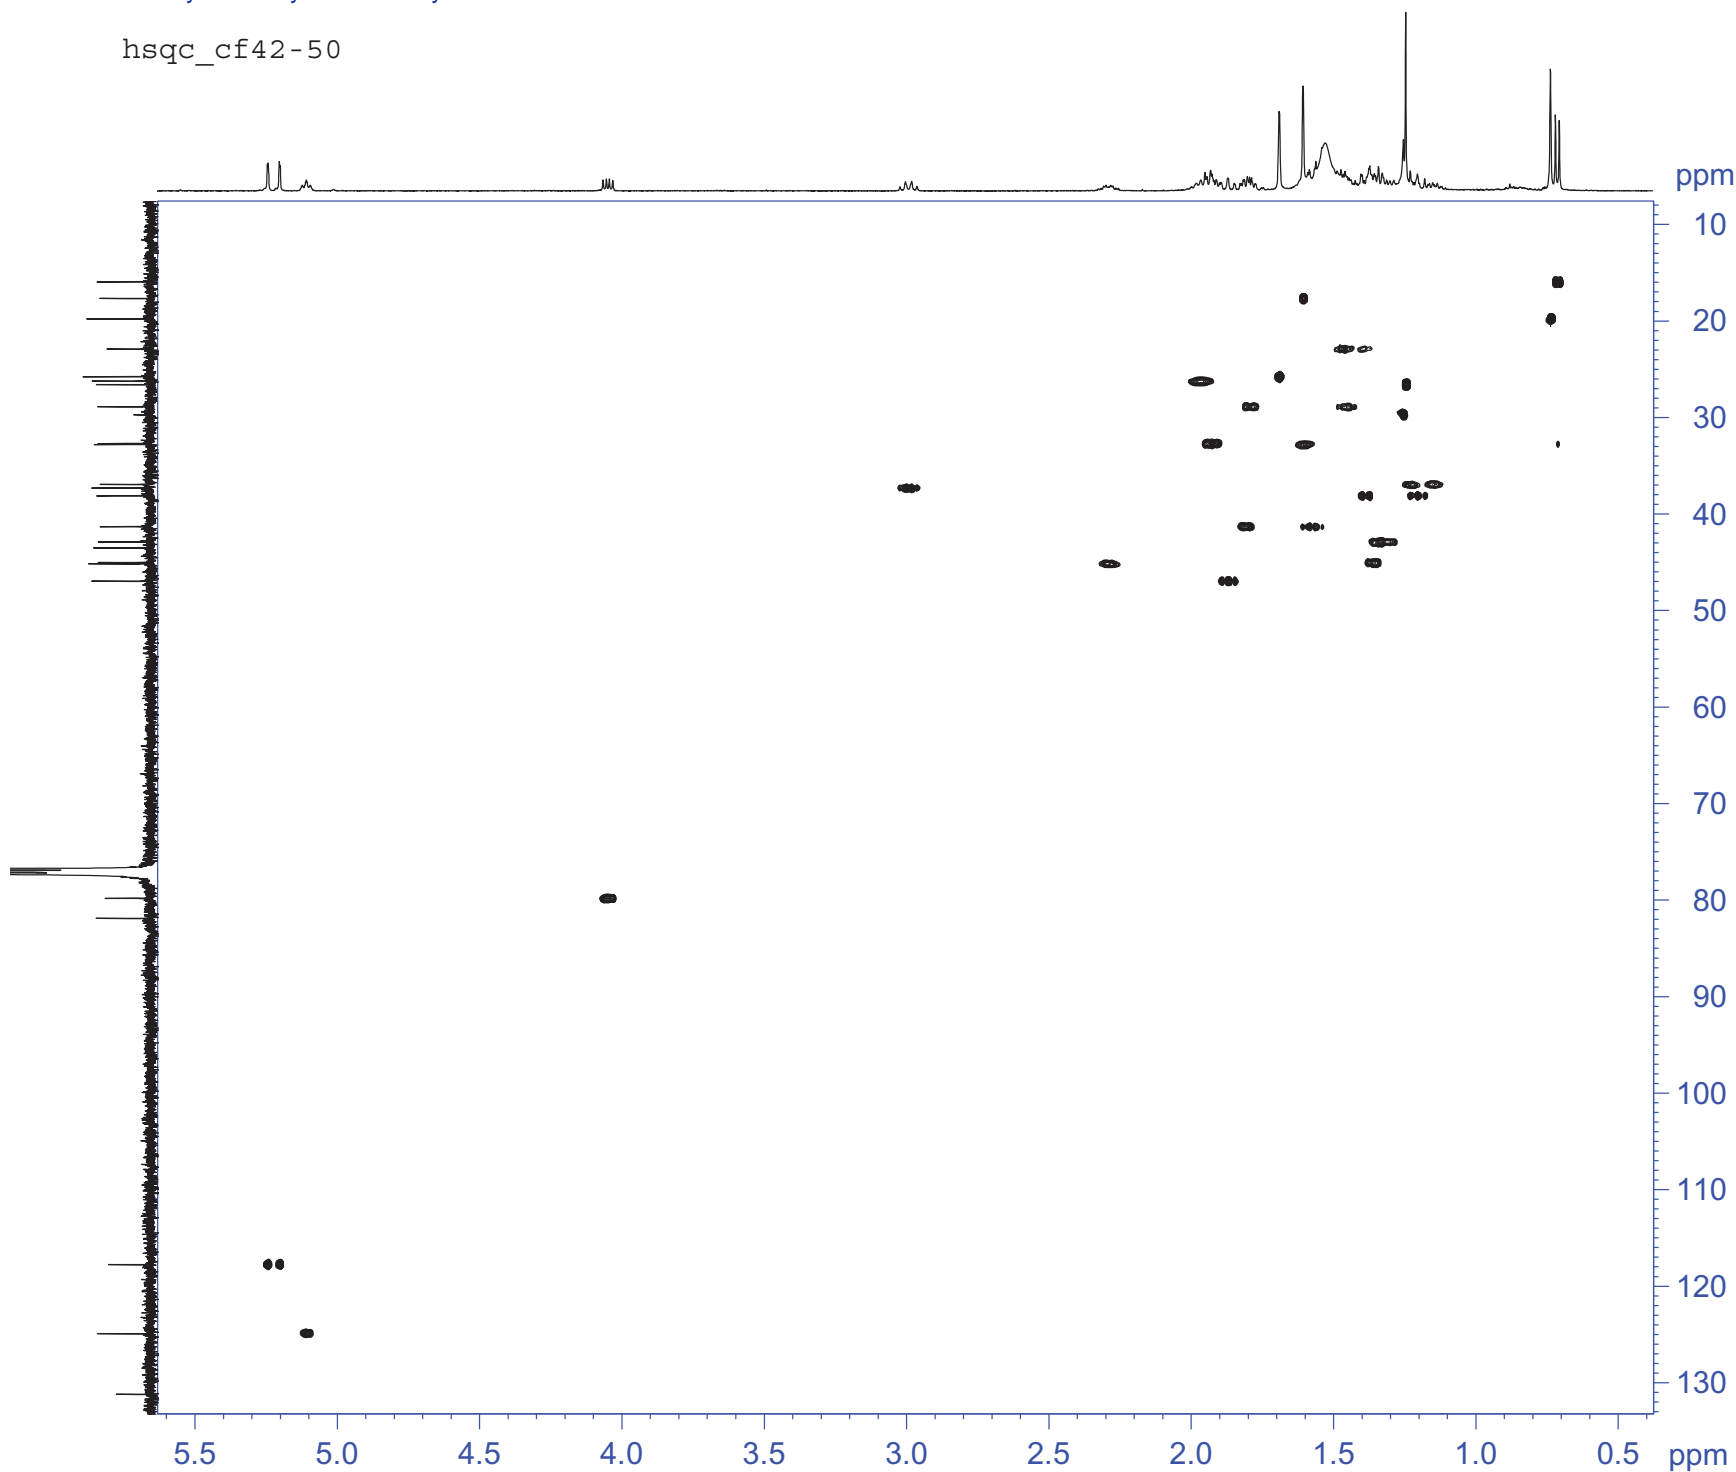

```
NAME 110620
EXPNO 2
PROCNO 1
Date_ 20110620
Time_ 10.21
INSTRUM spect
PROBHD 5 mm PABBO BB-
PULPROG hsqcetgpsisp2
TD 2048
SOLVENT CDCl3
NS 16
DS 16
SWH 4504.504 Hz
FIDRES 2.199465 Hz
AQ 0.2273780 sec
RG 203
DE 6.50 usec
TE 298.1 K
CNST2 145.0000000
D0 0.0000300 sec
D1 2.0000000 sec
D4 0.00172414 sec
D11 0.03000000 sec
D16 0.00020000 sec
D24 0.00086207 sec
IN0 0.00002650 sec
ZGPTNS

===== CHANNEL f1 =====
NUC1 1H
P1 11.90 usec
P2 23.80 usec
P28 0.00 usec
PL1 0.35 dB
PL1W 19.76737595 W
SFO1 500.1319005 MHz

===== CHANNEL f2 =====
CPDPRG2 garp
NUC2 13C
P3 11.90 usec
P4 23.80 usec
P14 500.00 usec
PCPD2 70.00 usec
PL0 120.00 dB
PL2 1.00 dB
PL12 16.39 dB
PL0W 0.00000000 W
PL2W 67.04081726 W
PL12W 1.93793559 W
SFO2 125.7665920 MHz
SP3 7.65 dB
SPNAM3 Crp60,0.5,20.1
SPOAL3 0.500
SPOFFS3 0.00 Hz

===== GRADIENT CHANNEL =====
GNAM1 SINE.100
GNAM2 SINE.100
GNAM3 SINE.100
GNAM4 SINE.100
GPZ1 80.00 %
GPZ2 20.10 %
GPZ3 11.00 %
GPZ4 -5.00 %
P16 1000.00 usec
P19 600.00 usec
TD 256
SFO1 125.7666 MHz
FIDRES 73.691360 Hz
SW 150.000 ppm
FnMODE Echo-Antiecho
SI 1024
SF 500.1300120 MHz
WDW QSINE
SSB 2
LB 0.00 Hz
GB 0
PC 1.40
SI 1024
MC2 echo-antiecho
SF 125.7577790 MHz
WDW QSINE
SSB 2
LB 0.00 Hz
GB 0
```

hmbc\_cf42-50

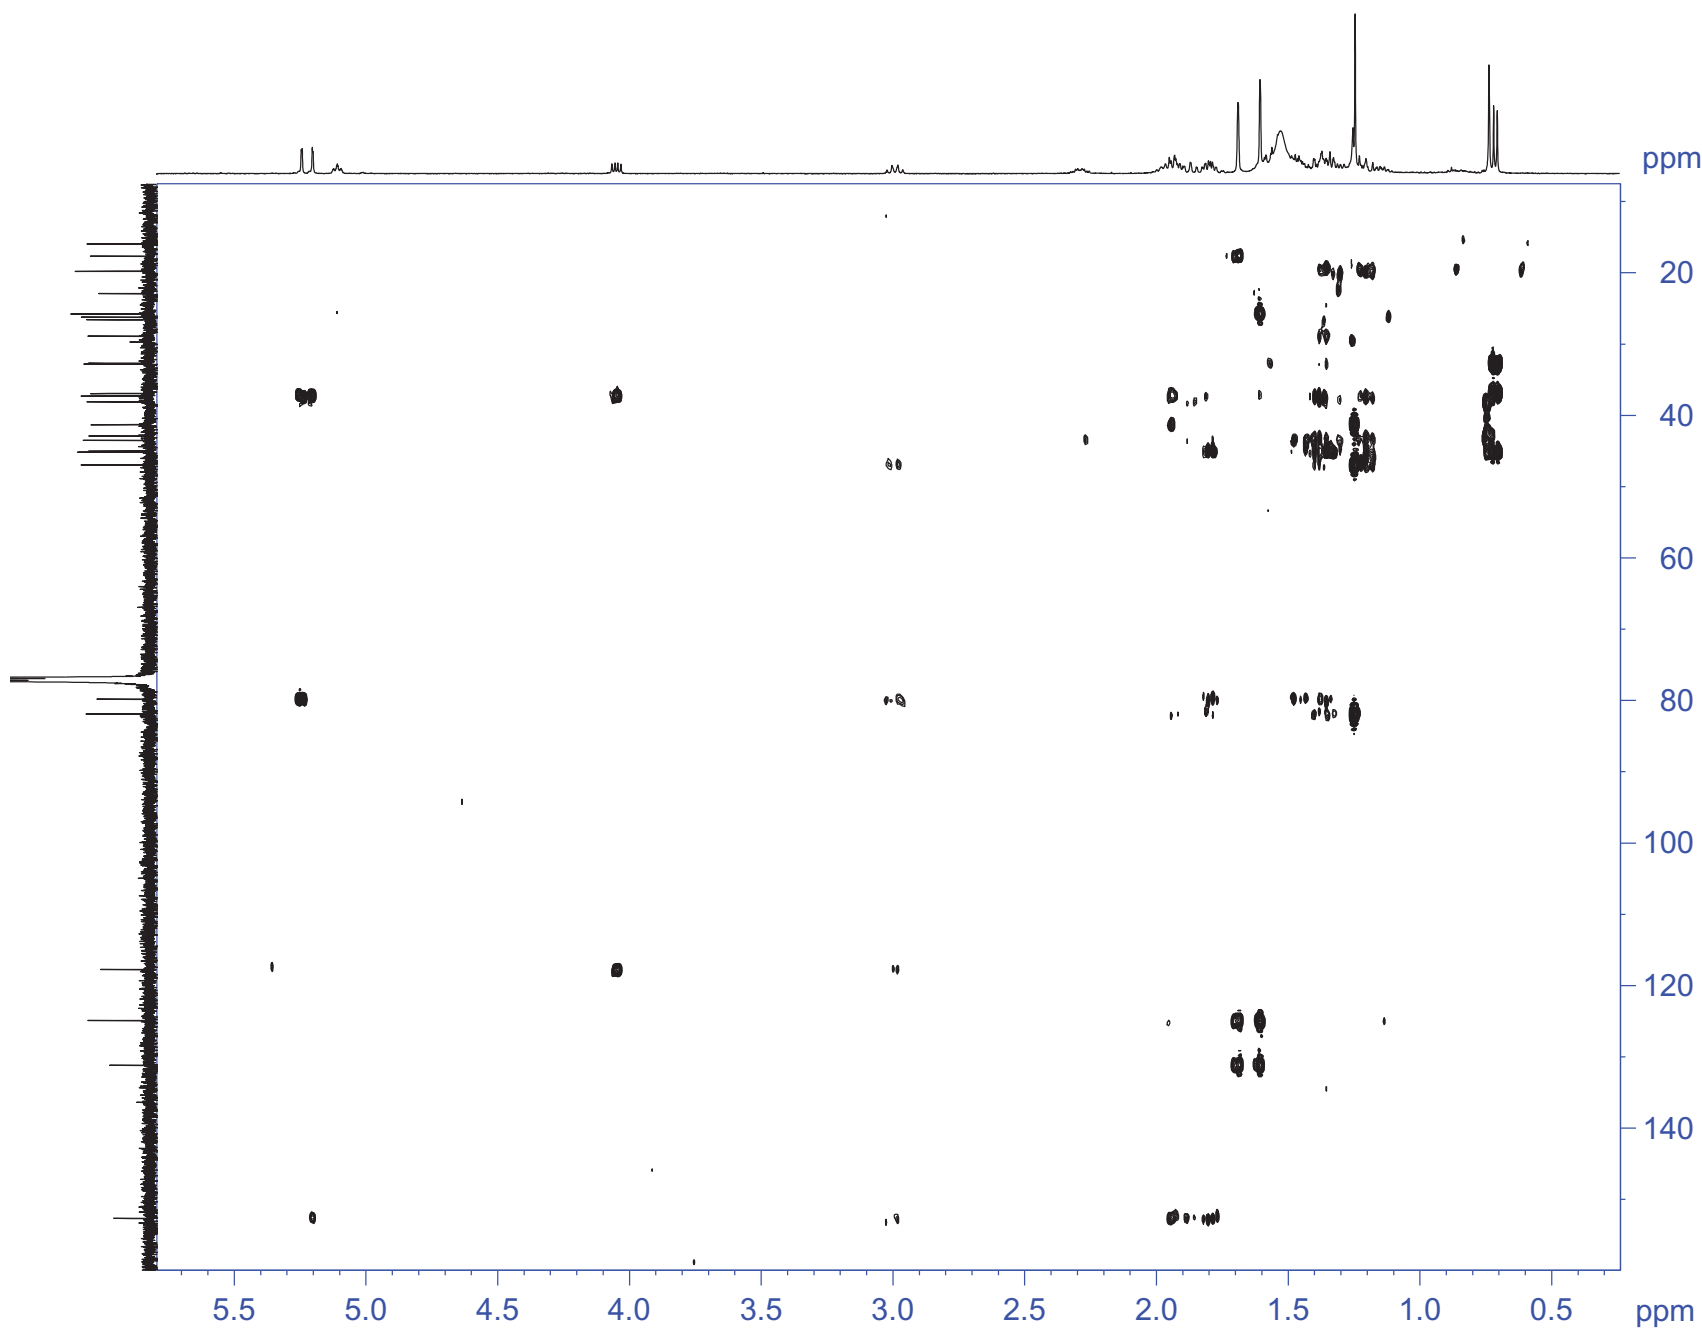

```
NAME 110620
EXPNO 3
PROCNO 1
Date_ 20110620
Time 12.55
INSTRUM spect
PROBHD 5 mm PABBO BB-
PULPROG hmbcetgp12nd
TD 4096
SOLVENT CDCl3
NS 32
DS 16
SWH 4504.504 Hz
FIDRES 1.099733 Hz
AQ 0.4547060 sec
RG 203
DW 111.000 usec
DE 6.50 usec
TE 298.0 K
CNST6 120.0000000
CNST7 180.0000000
CNST13 7.0000000
CNST30 0.5981198
D0 0.00000300 sec
D1 1.50000000 sec
D6 0.07142857 sec
D16 0.00020000 sec
IN0 0.00002210 sec

===== CHANNEL f1 =====
NUC1 1H
P1 11.90 usec
P2 23.80 usec
PL1 0.35 dB
PL1W 19.76737595 W
SFO1 500.1319005 MHz

===== CHANNEL f2 =====
NUC2 13C
P3 11.90 usec
P24 2000.00 usec
PL2 1.00 dB
PL2W 67.04081726 W
SFO2 125.7684784 MHz
SP7 7.65 dB
SPNAM7 Crp60comp.4
SPOAL7 0.500
SPOFFS7 0.00 Hz

===== GRADIENT CHANNEL =====
GPNAM1 SINE.100
GPNAM3 SINE.100
GPNAM4 SINE.100
GPNAM5 SINE.100
GPZ1 80.00 %
GPZ3 15.00 %
GPZ4 -10.00 %
GPZ5 -5.00 %
P16 1000.00 usec
ND0 2
TD 256
SFO1 125.7685 MHz
FIDRES 88.430962 Hz
SW 180.000 ppm
FnMODE Echo-Antiecho
SI 1024
SF 500.1300120 MHz
WDW SINE
SSB 0
LB 0.00 Hz
GB 0
PC 1.40
SI 1024
MC2 echo-antiecho
SF 125.7577790 MHz
WDW SINE
SSB 0
LB 0.00 Hz
GB 0
```



cosy\_cf42-50

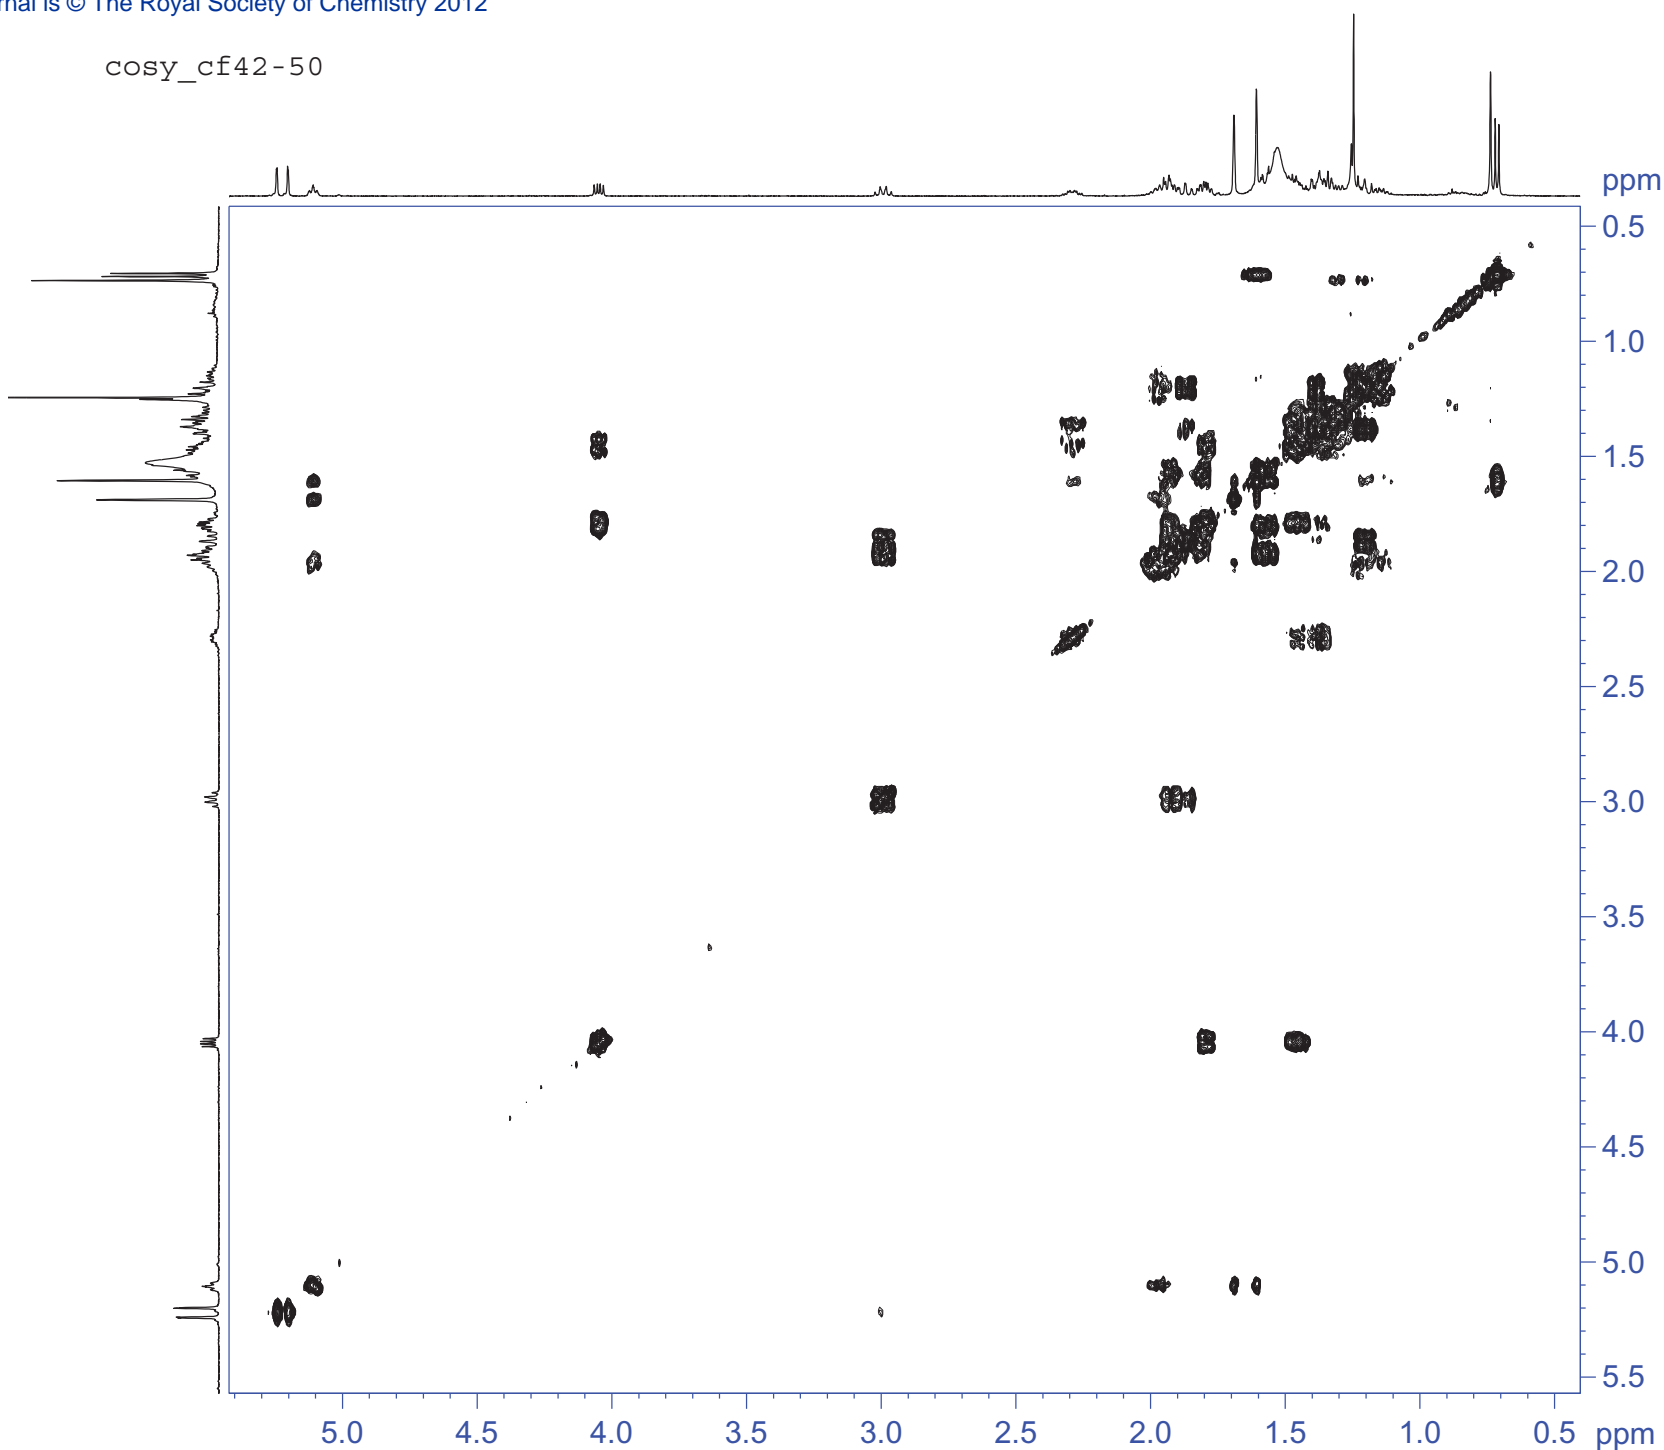

NAME 110620  
EXPNO 1  
PROCNO 1  
Date\_ 20110620  
Time\_ 9.40  
INSTRUM spect  
PROBHD 5 mm PABBO BB-  
PULPROG cosygpmfzf  
TD 2048  
SOLVENT CDCl3  
NS 4  
DS 16  
SWH 4504.504 Hz  
FIDRES 2.199465 Hz  
AQ 0.2273780 sec  
RG 203  
DW 111.000 usec  
DE 6.50 usec  
TE 298.1 K  
D0 0.00000300 sec  
D1 2.00000000 sec  
D13 0.00000400 sec  
D16 0.00020000 sec  
IN0 0.00022215 sec

==== CHANNEL f1 =====  
NUC1 1H  
P1 11.90 usec  
PL1 0.35 dB  
PL1W 19.76737595 W  
SFO1 500.1319005 MHz

==== GRADIENT CHANNEL =====  
GPNAM1 SINE.100  
GPNAM2 SINE.100  
GPNAM3 SINE.100  
GPZ1 16.00 %  
GPZ2 12.00 %  
GPZ3 40.00 %  
P16 1000.00 usec  
ND0 1  
TD 256  
SFO1 500.1319 MHz  
FIDRES 17.582762 Hz  
SW 9.000 ppm  
FnMODE QF  
SI 1024  
SF 500.1300129 MHz  
WDW SINE  
SSB 0  
LB 0.00 Hz  
GB 0  
PC 1.40  
SI 1024  
MC2 QF  
SF 500.1300129 MHz  
WDW SINE  
SSB 0  
LB 0.00 Hz  
GB 0

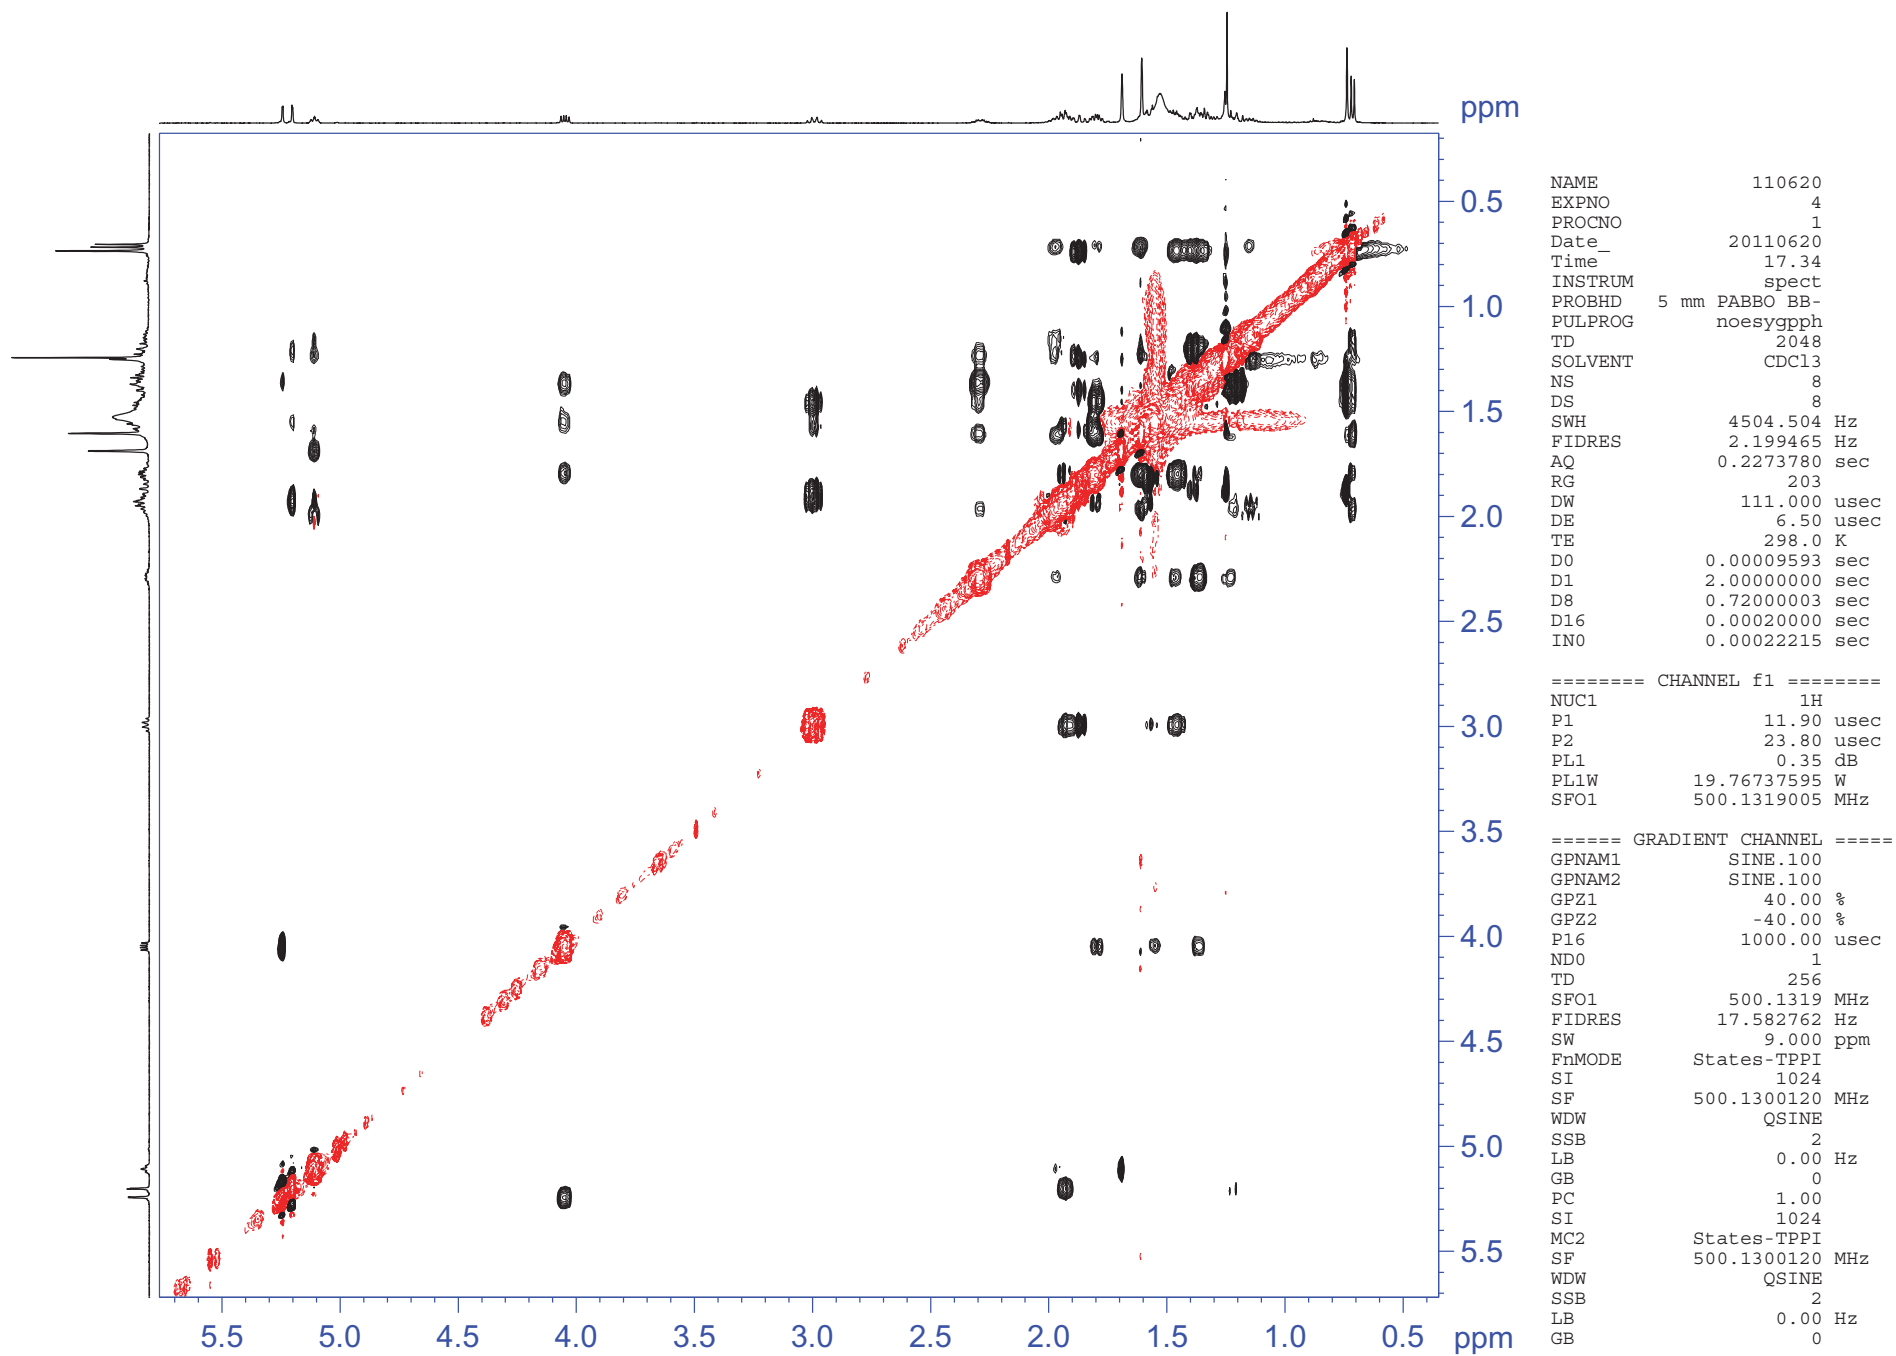

## Elemental Composition Report

Page 1

### Single Mass Analysis (displaying only valid results)

Tolerance = 10.0 PPM / DBE: min = 0.5, max = 40.0

Selected filters: None

Monoisotopic Mass, Odd and Even Electron Ions

15 formula(e) evaluated with 1 results within limits (up to 51 closest results for each mass)

Elements Used:

C: 0-200 H: 0-400 O: 0-2

cf42-50

17:15:26 27-Jun-2011

Voltage EI+

KIB  
M110627EA-03AFAMM 16 (1.469)  
374.3179

Autospec Premier  
P776  
1.84e3

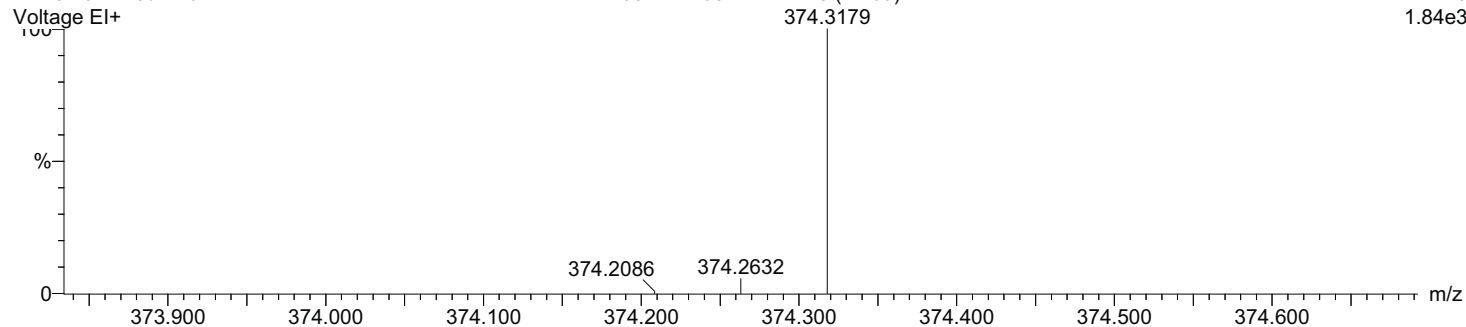

Minimum: 0.5  
Maximum: 100.0 10.0 40.0

| Mass     | Calc. Mass | mDa  | PPM  | DBE | i-FIT     | Formula    |
|----------|------------|------|------|-----|-----------|------------|
| 374.3179 | 374.3185   | -0.6 | -1.6 | 5.0 | 5546938.0 | C25 H42 O2 |

cf42-20

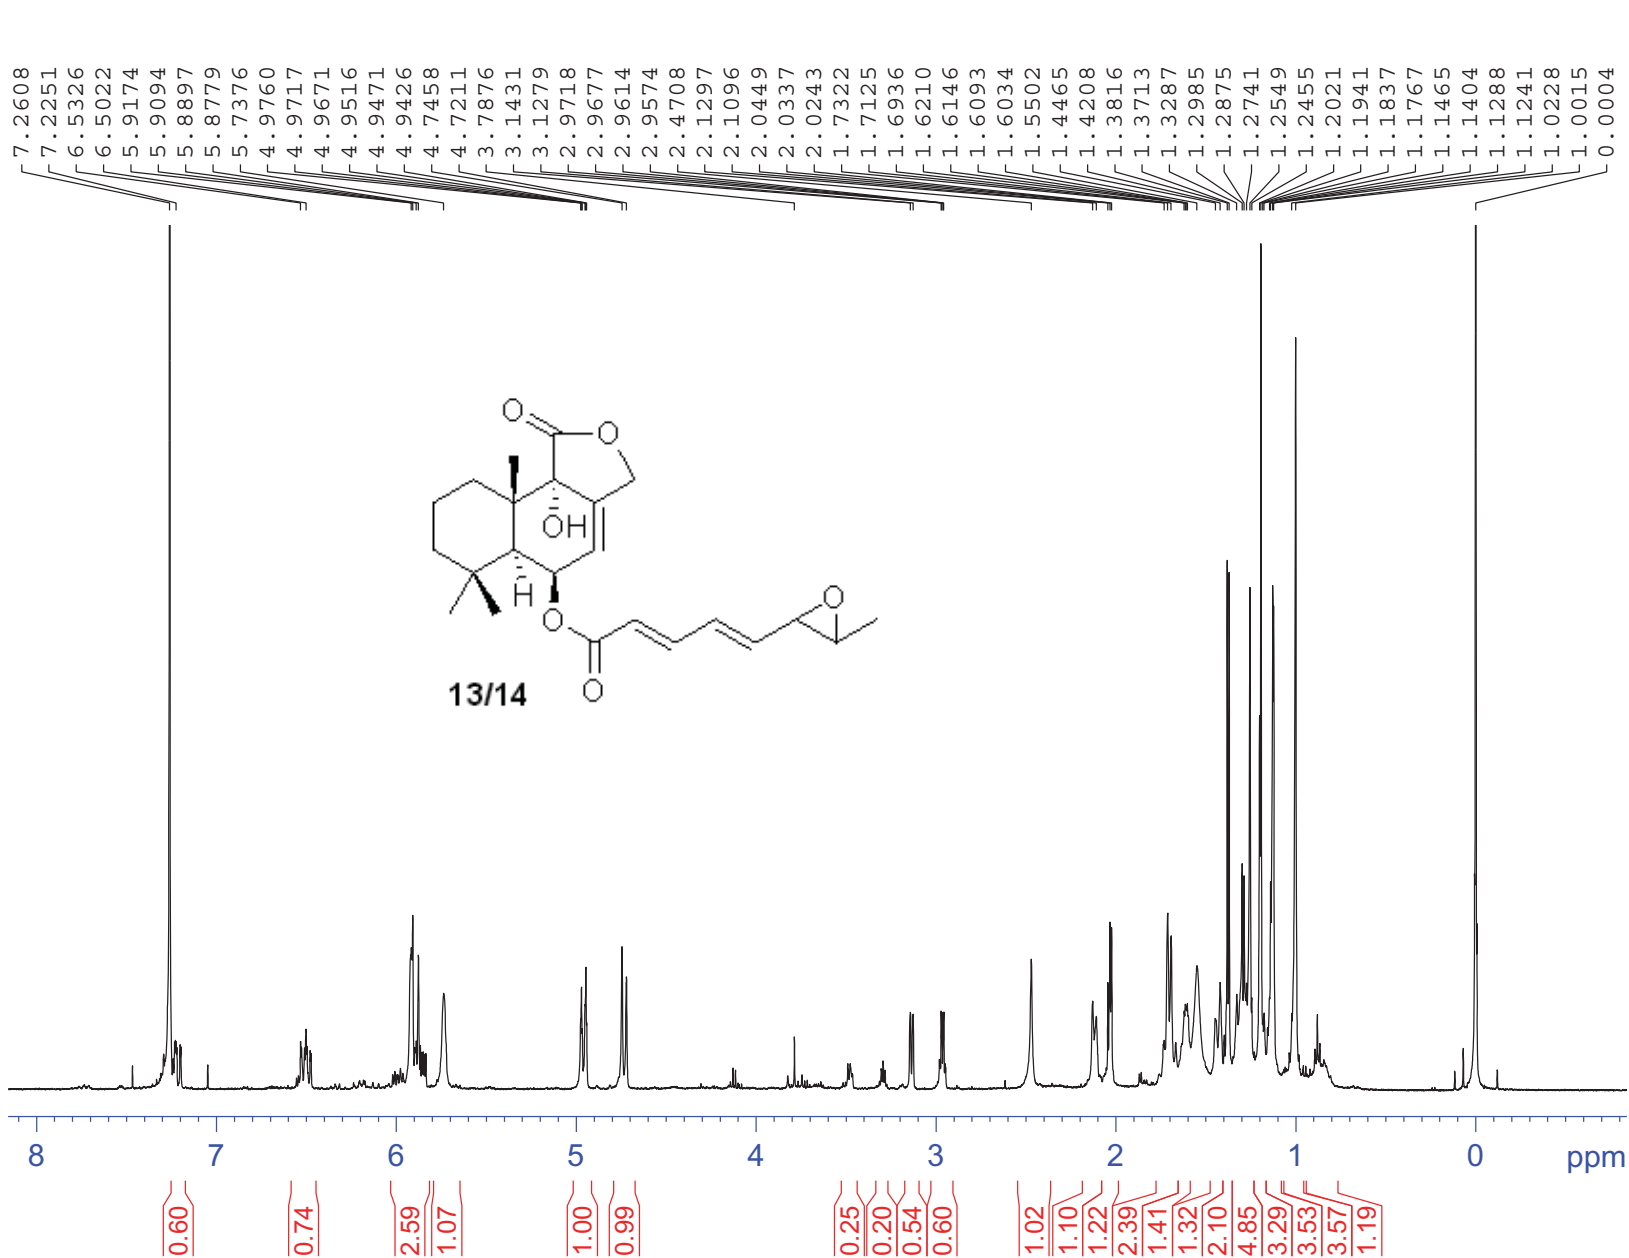

```

NAME          110323
EXPNO         12
PROCNO        1
Date_         20110323
Time          14.40
INSTRUM       spect
PROBHD        5 mm PABBO BB-
PULPROG       zg30
TD            65536
SOLVENT       CDCl3
NS            40
DS            0
SWH           10330.578 Hz
FIDRES        0.157632 Hz
AQ            3.1719923 sec
RG            203
DW            48.400 usec
DE            6.50 usec
TE            298.0 K
D1            1.00000000 sec
TD0           1

===== CHANNEL f1 =====
NUC1          1H
P1            11.90 usec
PL1           0.35 dB
PL1W          19.76737595 W
SFO1          500.1330885 MHz
SI            32768
SF            500.1300134 MHz
WDW           EM
SSB           0
LB            0.30 Hz
GB            0
PC            1.00
    
```

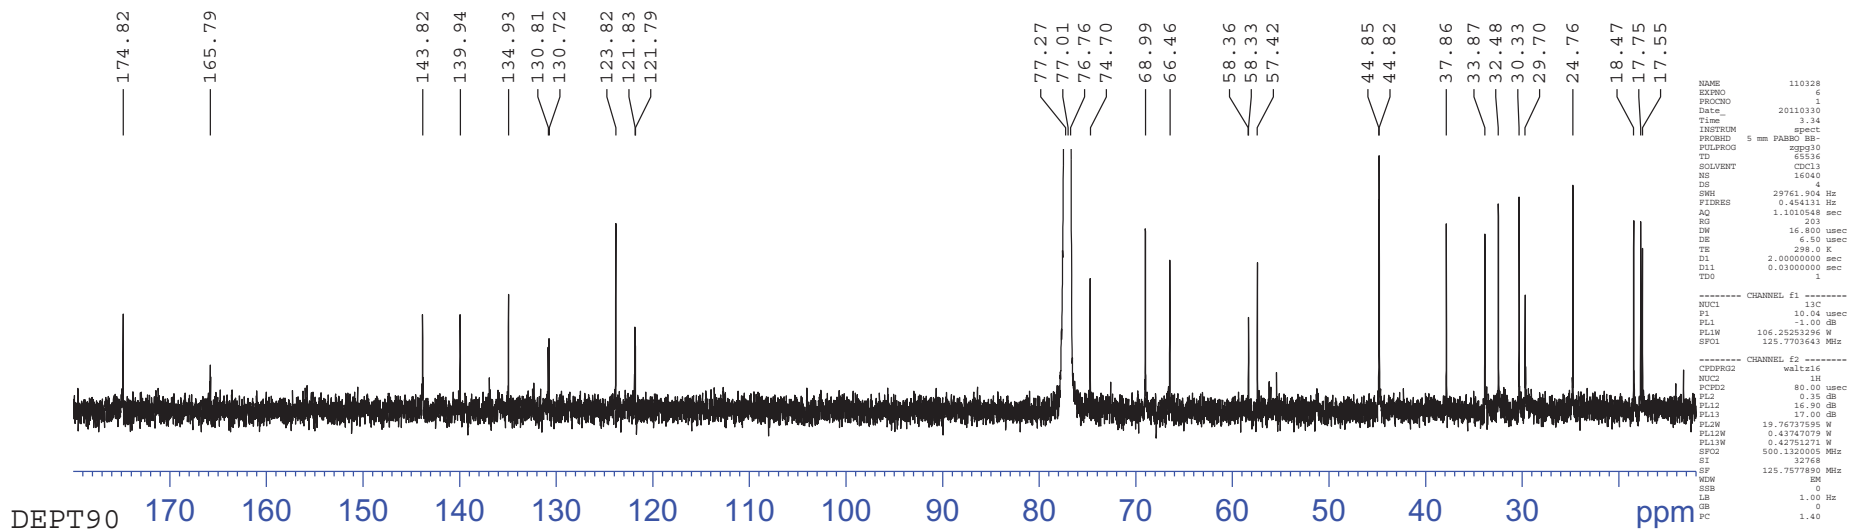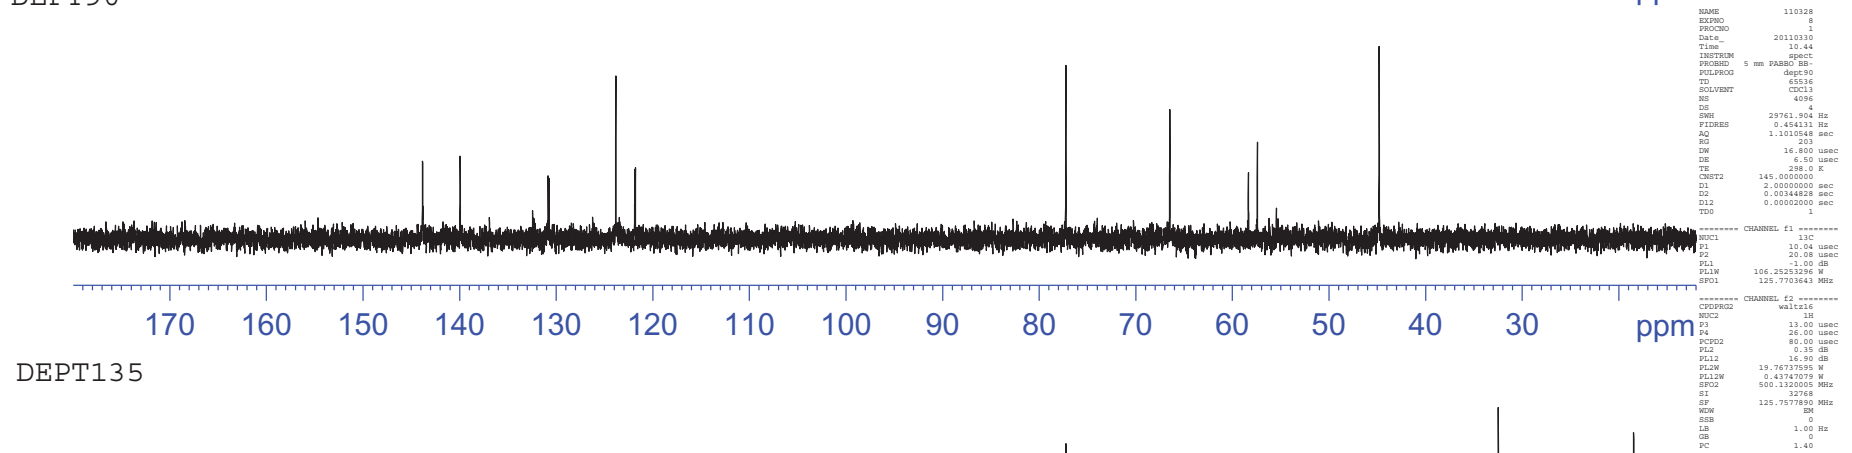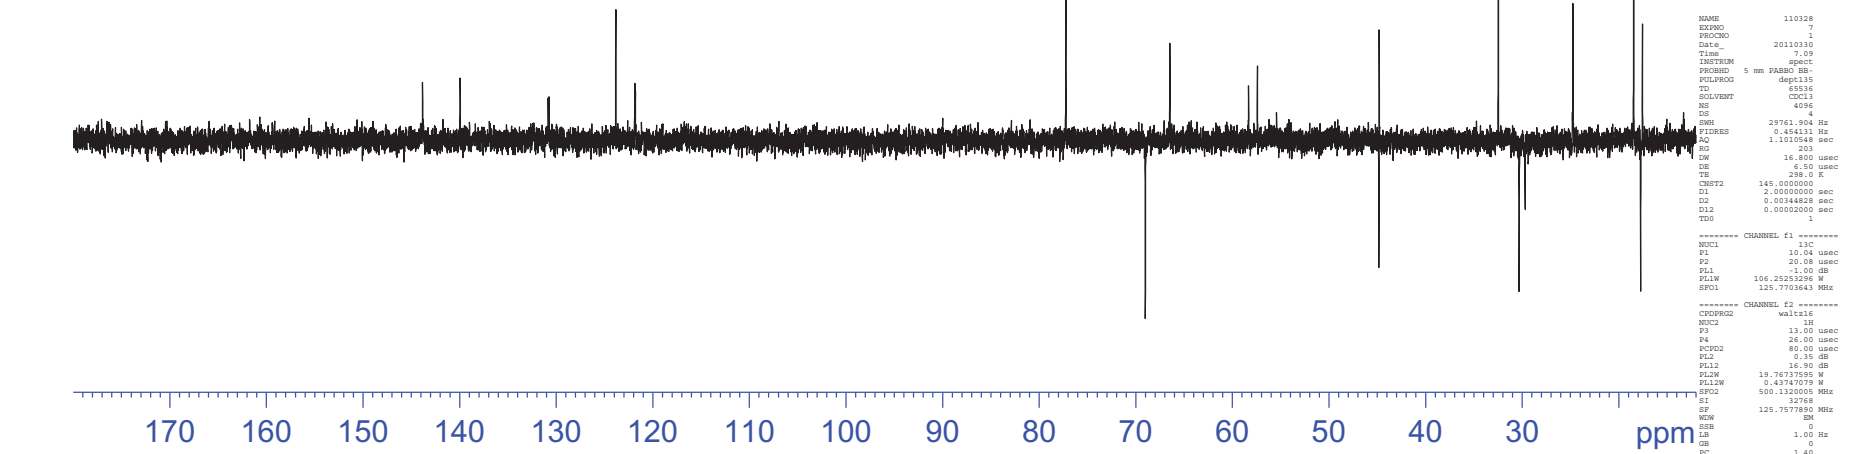

hsqc\_cf42-20

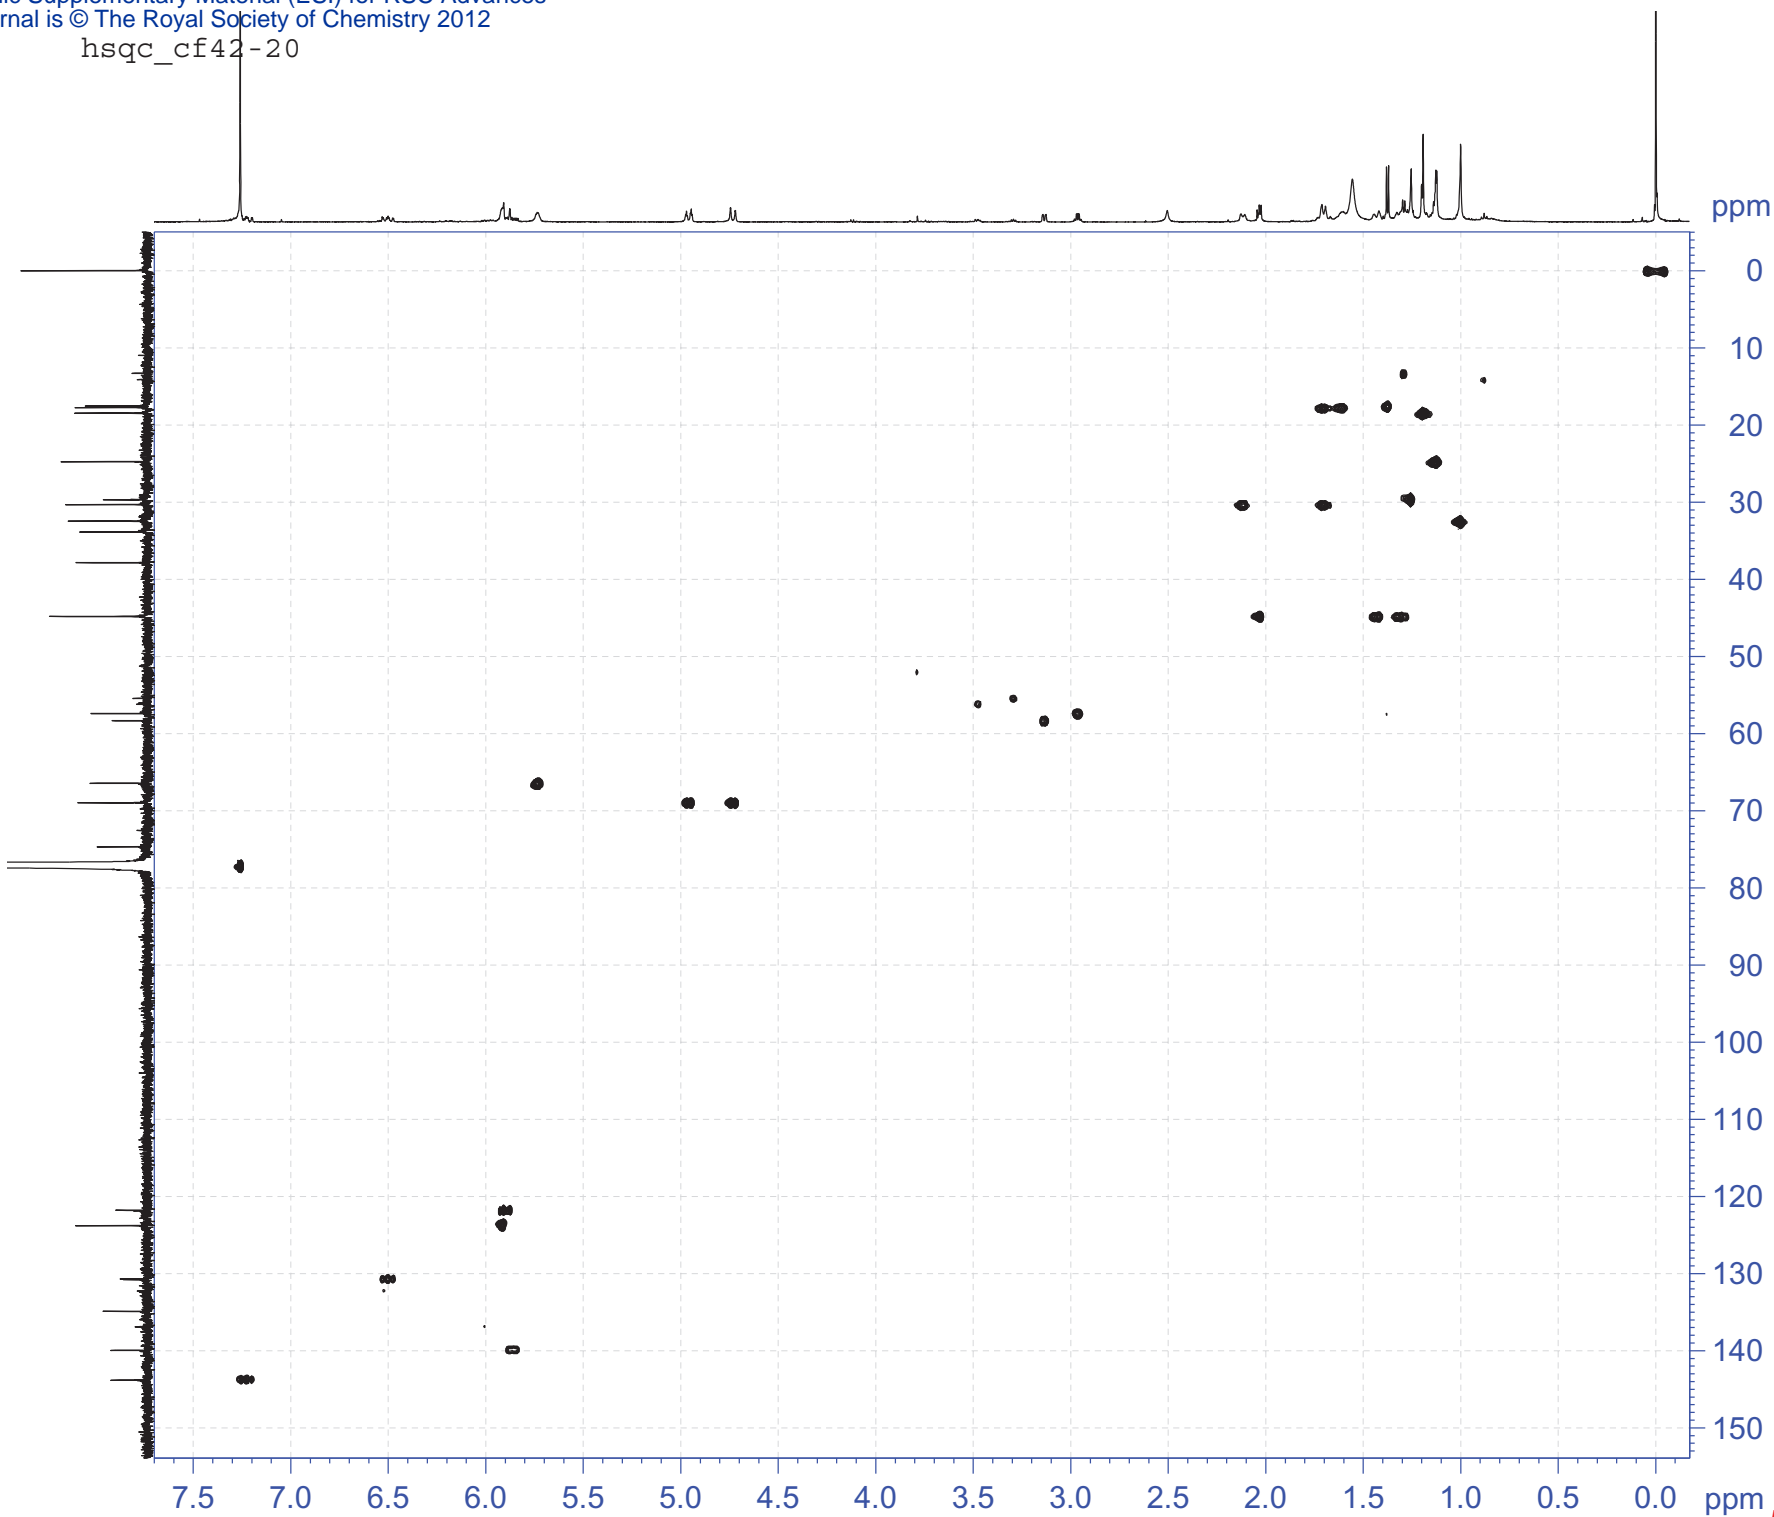

```
NAME          110406
EXPNO         3
PROCNO        1
Date_         20110406
Time_         20.48
INSTRUM       spect
PROBHD        5 mm PABBO BB-
PULPROG       hsqcetgpsisp2
TD            2048
SOLVENT       CDCl3
NS            64
DS            16
SWH           4504.504 Hz
FIDRES        2.199465 Hz
AQ            0.2273780 sec
RG            203
DW            111.000 usec
DE            6.50 usec
TE            298.1 K
CNST2         145.0000000
DO            0.0000300 sec
D1            2.0000000 sec
D4            0.00172414 sec
D11           0.03000000 sec
D16           0.00020000 sec
D24           0.00086207 sec
INO           0.00002090 sec
ZGOPTNS

===== CHANNEL f1 =====
NUC1          1H
P1            11.90 usec
P2            23.80 usec
P28           0.00 usec
PL1           0.35 dB
PL1W          19.76737595 W
SFO1          500.1320005 MHz

===== CHANNEL f2 =====
CPDPRG2       garp
NUC2          13C
P3            11.90 usec
P4            23.80 usec
P14           500.00 usec
PCPD2         70.00 usec
PL0           120.00 dB
PL2           1.00 dB
PL12          16.39 dB
PLOW          0.00000000 W
PL2W          67.04081726 W
PL12W         1.93793559 W
SFO2          125.7678496 MHz
SP3           7.65 dB
SPNAM3        Crp60,0.5,20.1
SPOAL3        0.500
SPOFFS3       0.00 Hz

===== GRADIENT CHANNEL =====
GPNAM1        SINE.100
GPNAM2        SINE.100
GPNAM3        SINE.100
GPNAM4        SINE.100
GPZ1          80.00 %
GPZ2          20.10 %
GPZ3          11.00 %
GPZ4          -5.00 %
P16           1000.00 usec
P19           600.00 usec
ND0           2
TD            256
SFO1          125.7678 MHz
FIDRES        93.343323 Hz
SW            190.000 ppm
PnMODE        Echo-Antiecho
SI            1024
SF            500.1300120 MHz
WDW           QSINE
SSB           2
LB            0.00 Hz
GB            0
PC            1.40
SI            1024
MC2           echo-antiecho
SF            125.7577790 MHz
WDW           QSINE
SSB           2
LB            0.00 Hz
GB            0
```

hmbc\_cr42-20

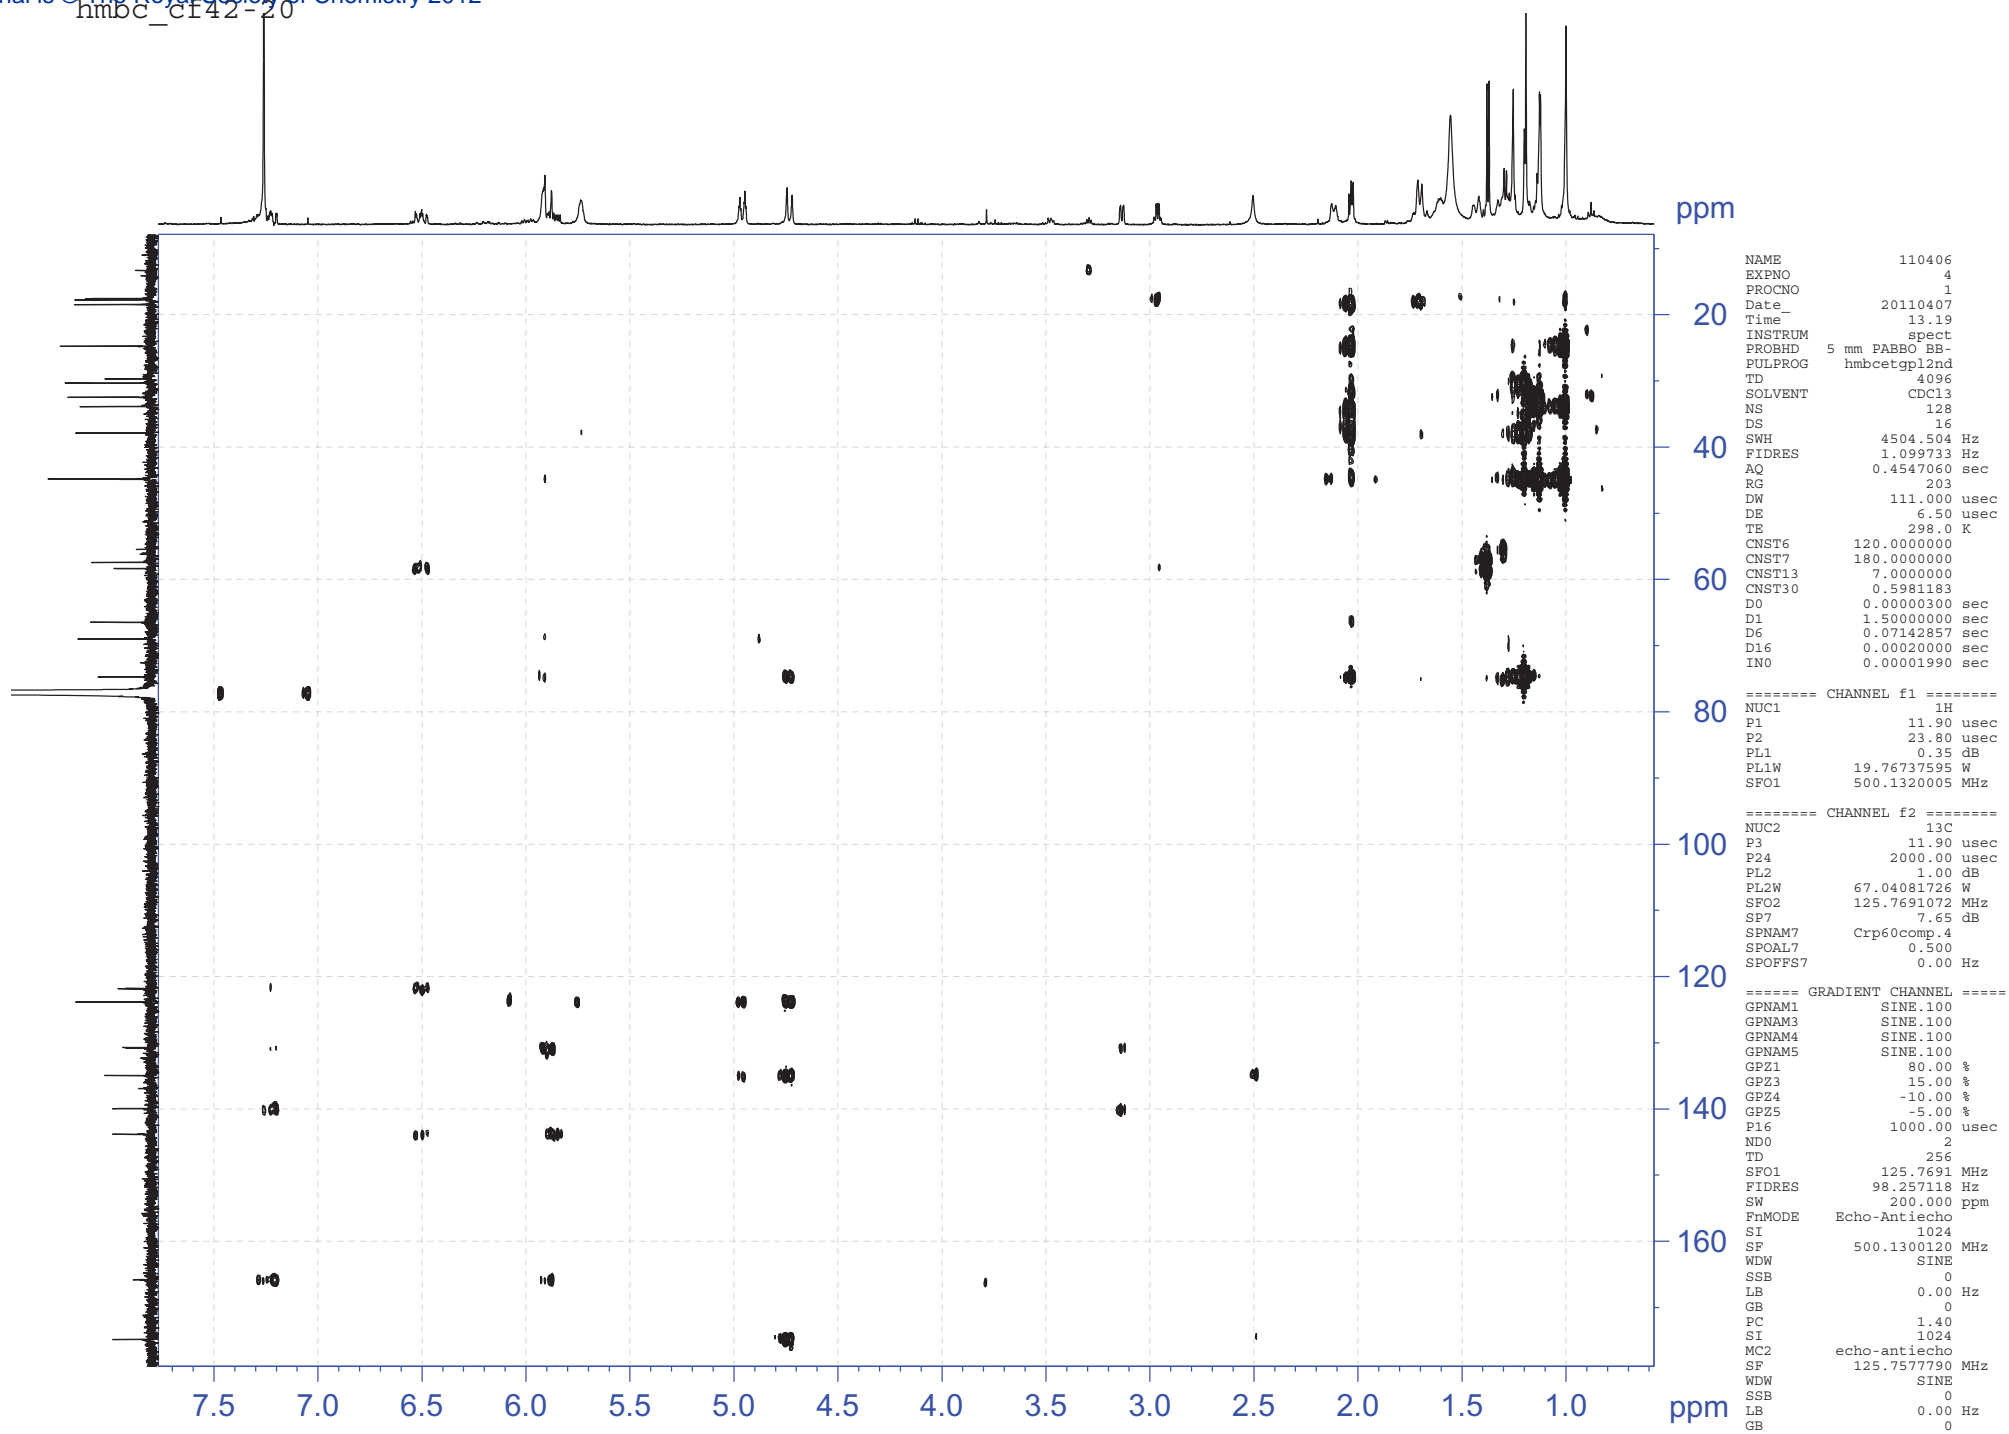

cosy\_cf42-20

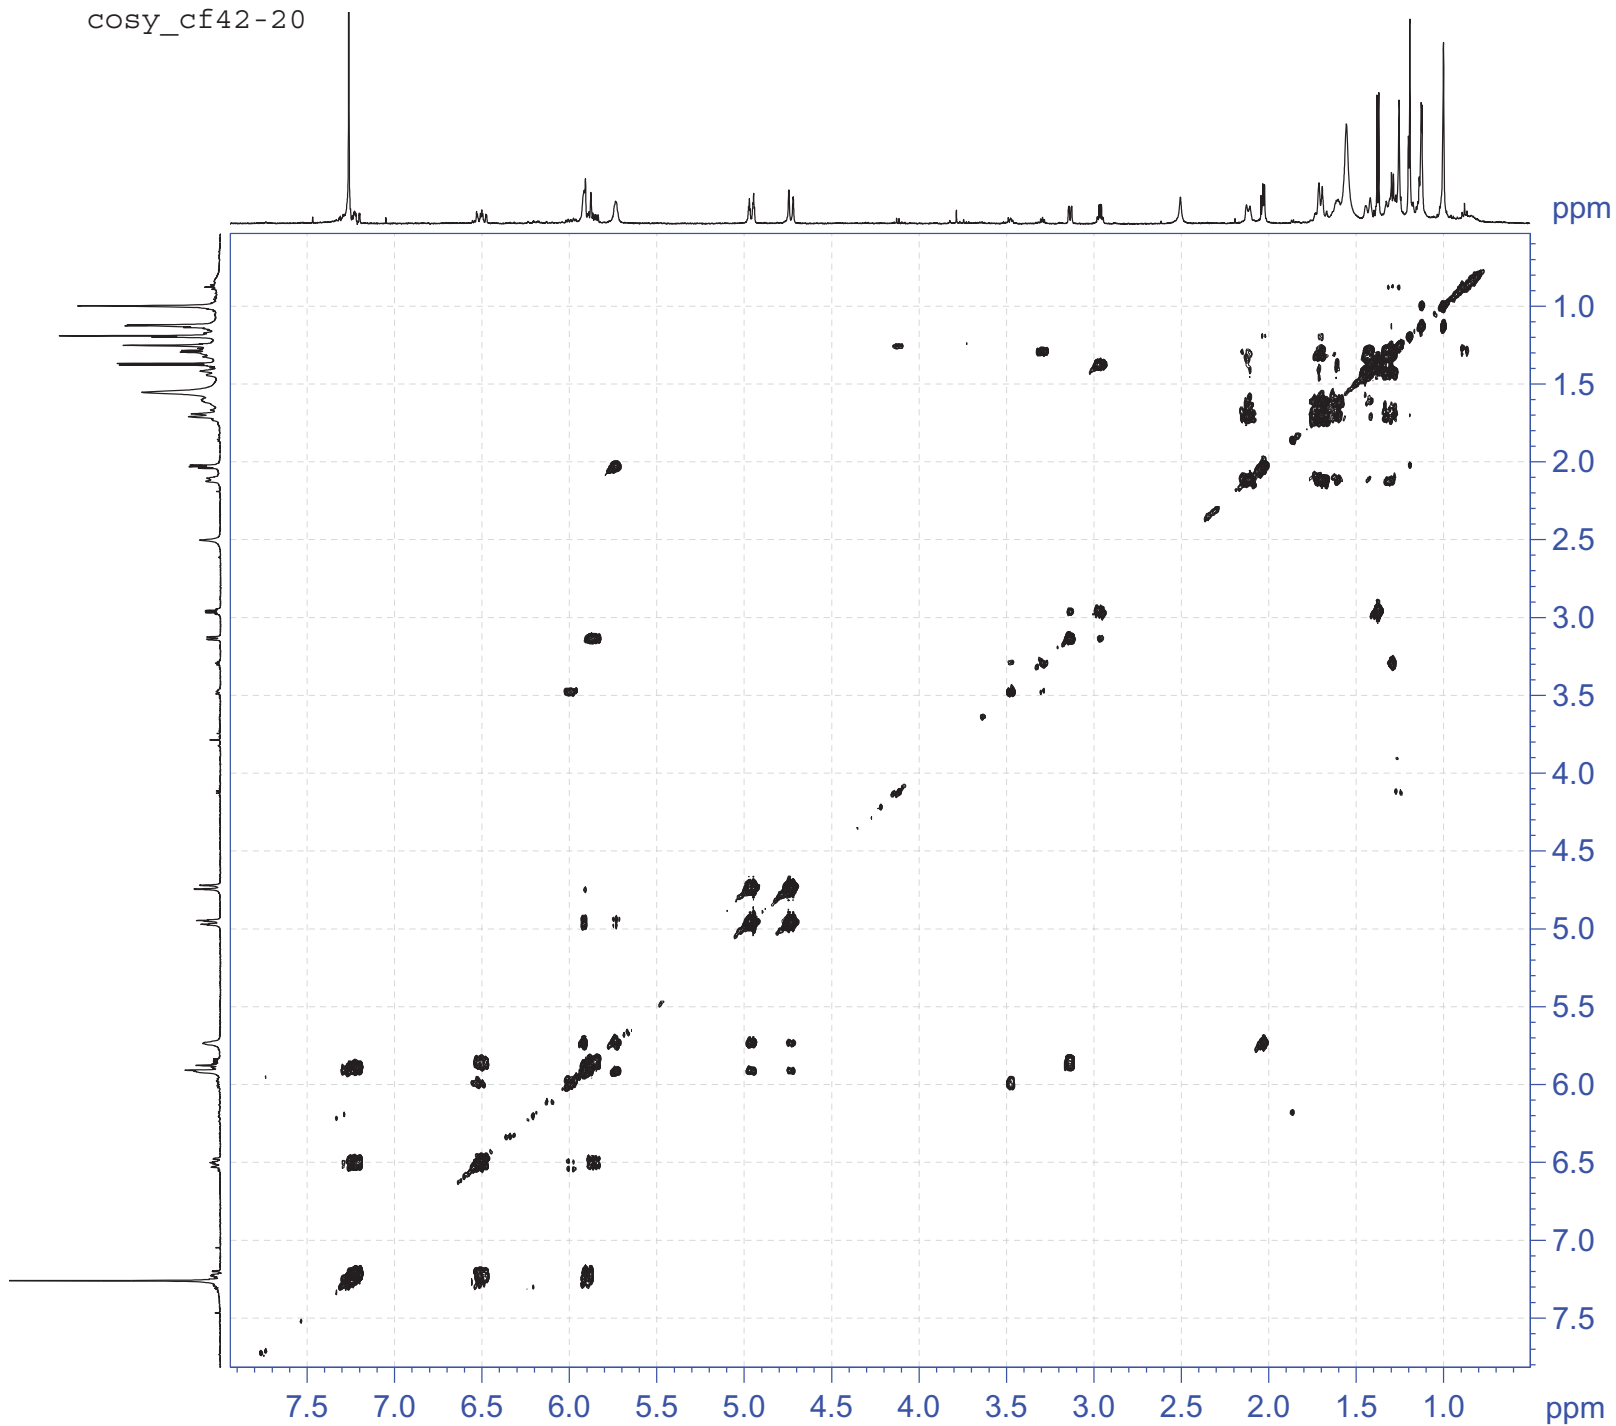

```
NAME          110406
EXPNO         2
PROCNO        1
Date_         20110406
Time_         19.27
INSTRUM       spect
PROBHD        5 mm PABBO BB-
PULPROG       cosygpmfzf
TD            2048
SOLVENT       CDCl3
NS            8
DS            16
SWH           4504.504 Hz
FIDRES        2.199465 Hz
AQ            0.2273780 sec
RG            203
DW            111.000 usec
DE            6.50 usec
TE            298.0 K
D0            0.00000300 sec
D1            2.00000000 sec
D13           0.00000400 sec
D16           0.00020000 sec
INO           0.00022215 sec
```

```
===== CHANNEL f1 =====
NUC1          1H
P1            11.90 usec
PL1           0.35 dB
PL1W          19.76737595 W
SFO1          500.1320005 MHz
```

```
===== GRADIENT CHANNEL =====
GPNAM1       SINE.100
GPNAM2       SINE.100
GPNAM3       SINE.100
GPZ1         16.00 %
GPZ2         12.00 %
GPZ3         40.00 %
P16          1000.00 usec
ND0          1
TD           256
SFO1         500.132 MHz
FIDRES       17.582766 Hz
SW           9.000 ppm
FnMODE       QF
SI           1024
SF           500.1300122 MHz
WDW          SINE
SSB          0
LB           0.00 Hz
GB           0
PC           1.40
SI           1024
MC2          QF
SF           500.1300122 MHz
WDW          SINE
SSB          0
LB           0.00 Hz
GB           0
```



noesy\_cf42-20

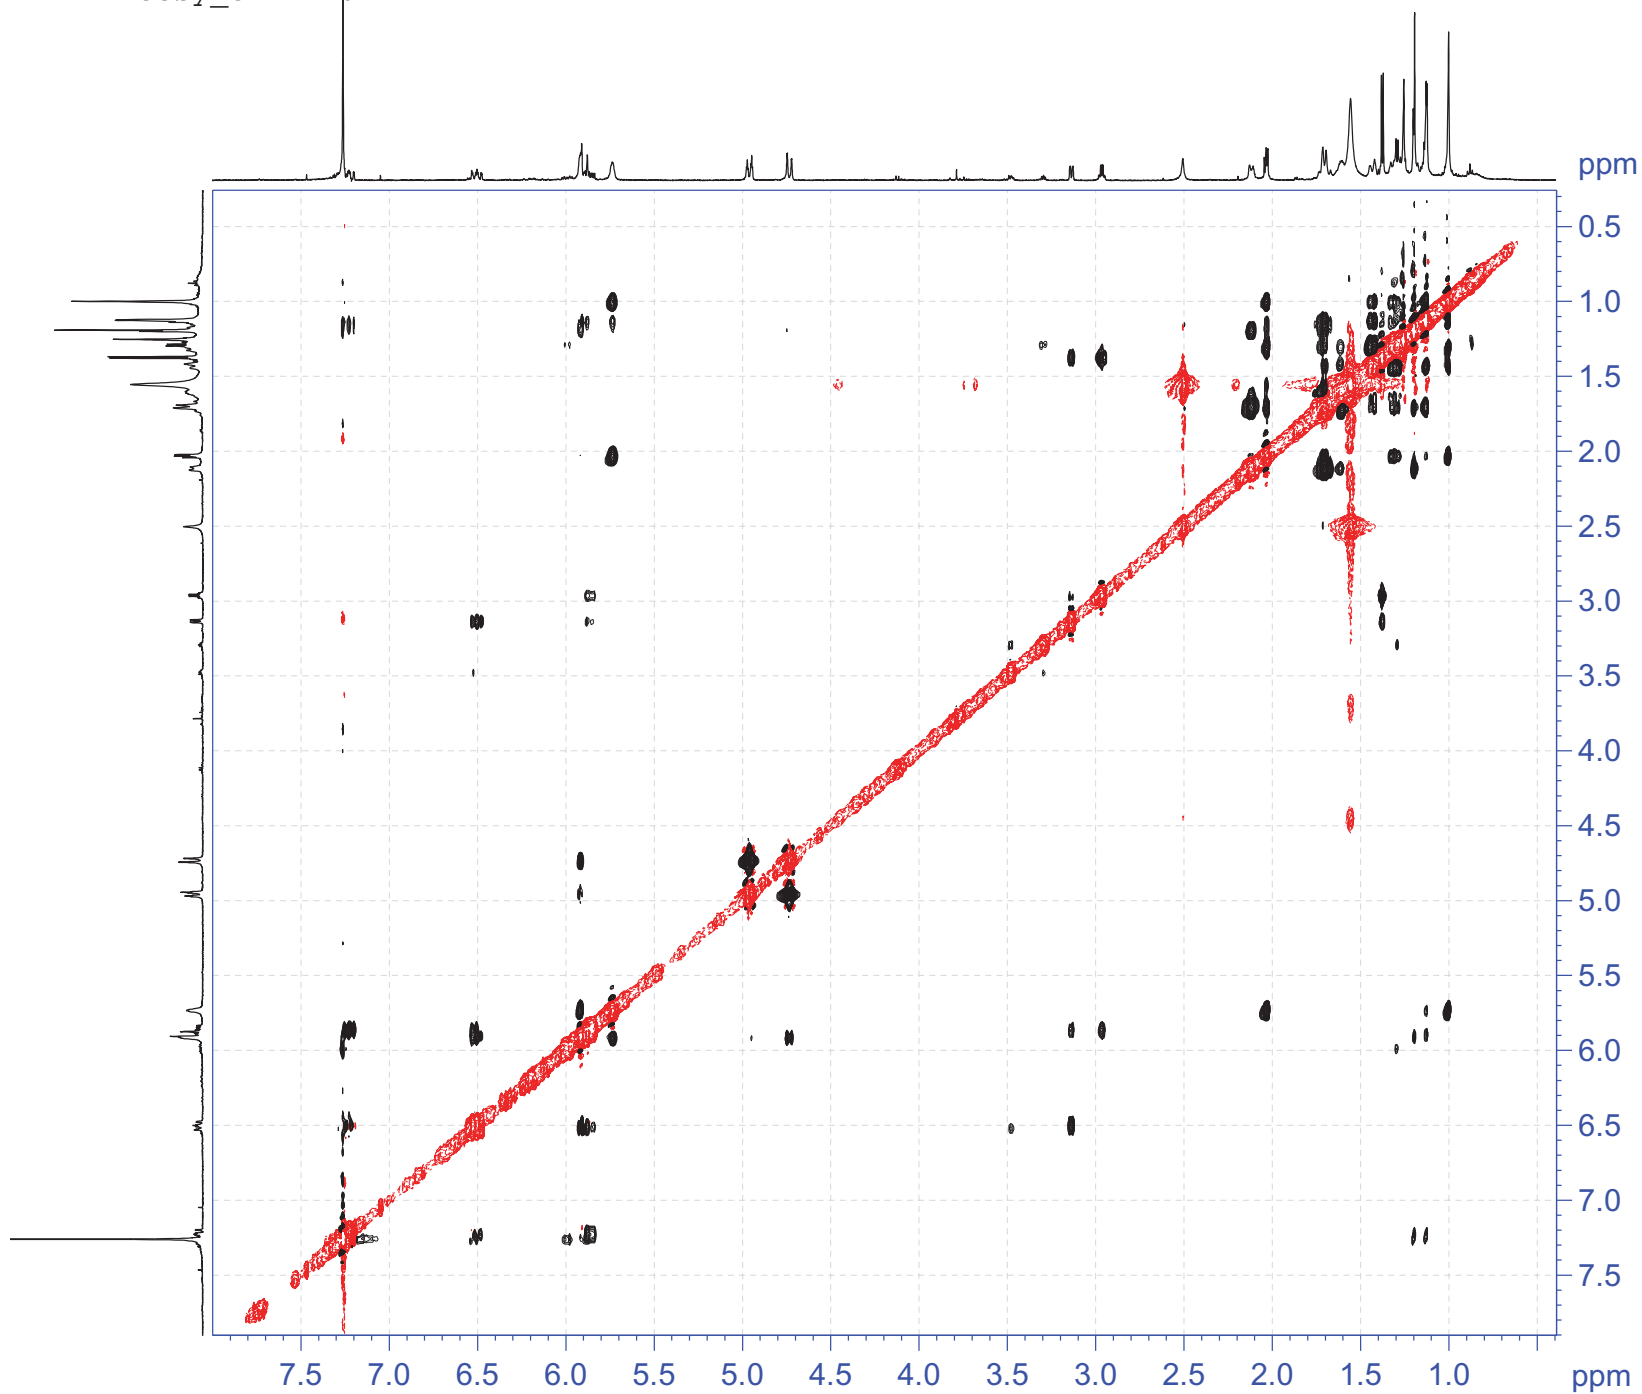

```
NAME 110406
EXPNO 5
PROCNO 1
Date_ 20110407
Time_ 9.46
INSTRUM spect
PROBHD 5 mm PABBO BB-
PULPROG noesygpph
TD 2048
SOLVENT CDCl3
NS 16
DS 16
SWH 4504.504 Hz
FIDRES 2.199465 Hz
AQ 0.2273780 sec
RG 203
DW 111.000 usec
DE 6.50 usec
TE 298.0 K
D0 0.00009593 sec
D1 2.00000000 sec
D8 0.80000001 sec
D16 0.00020000 sec
IN0 0.00022215 sec

===== CHANNEL f1 =====
NUC1 1H
P1 11.90 usec
P2 23.80 usec
PL1 0.35 dB
PL1W 19.76737595 W
SFO1 500.132005 MHz

===== GRADIENT CHANNEL =====
GPNAM1 SINE.100
GPNAM2 SINE.100
GPZ1 40.00 %
GPZ2 -40.00 %
P16 1000.00 usec
ND0 1
TD 256
SFO1 500.132 MHz
FIDRES 17.582766 Hz
SW 9.000 ppm
FnMODE States-TPPI
SI 1024
SF 500.1300120 MHz
WDW QSINE
SSB 2
LB 0.00 Hz
GB 0
PC 1.00
SI 1024
MC2 States-TPPI
SF 500.1300120 MHz
WDW QSINE
SSB 2
LB 0.00 Hz
GB 0
```

+TOF MS: 1.333 to 2.100 min from 110429ESIA cf42-20.wiff  
a=3.55966344865418650e-004, t0=8.13430008453506160e+001

Max. 2.0 counts.

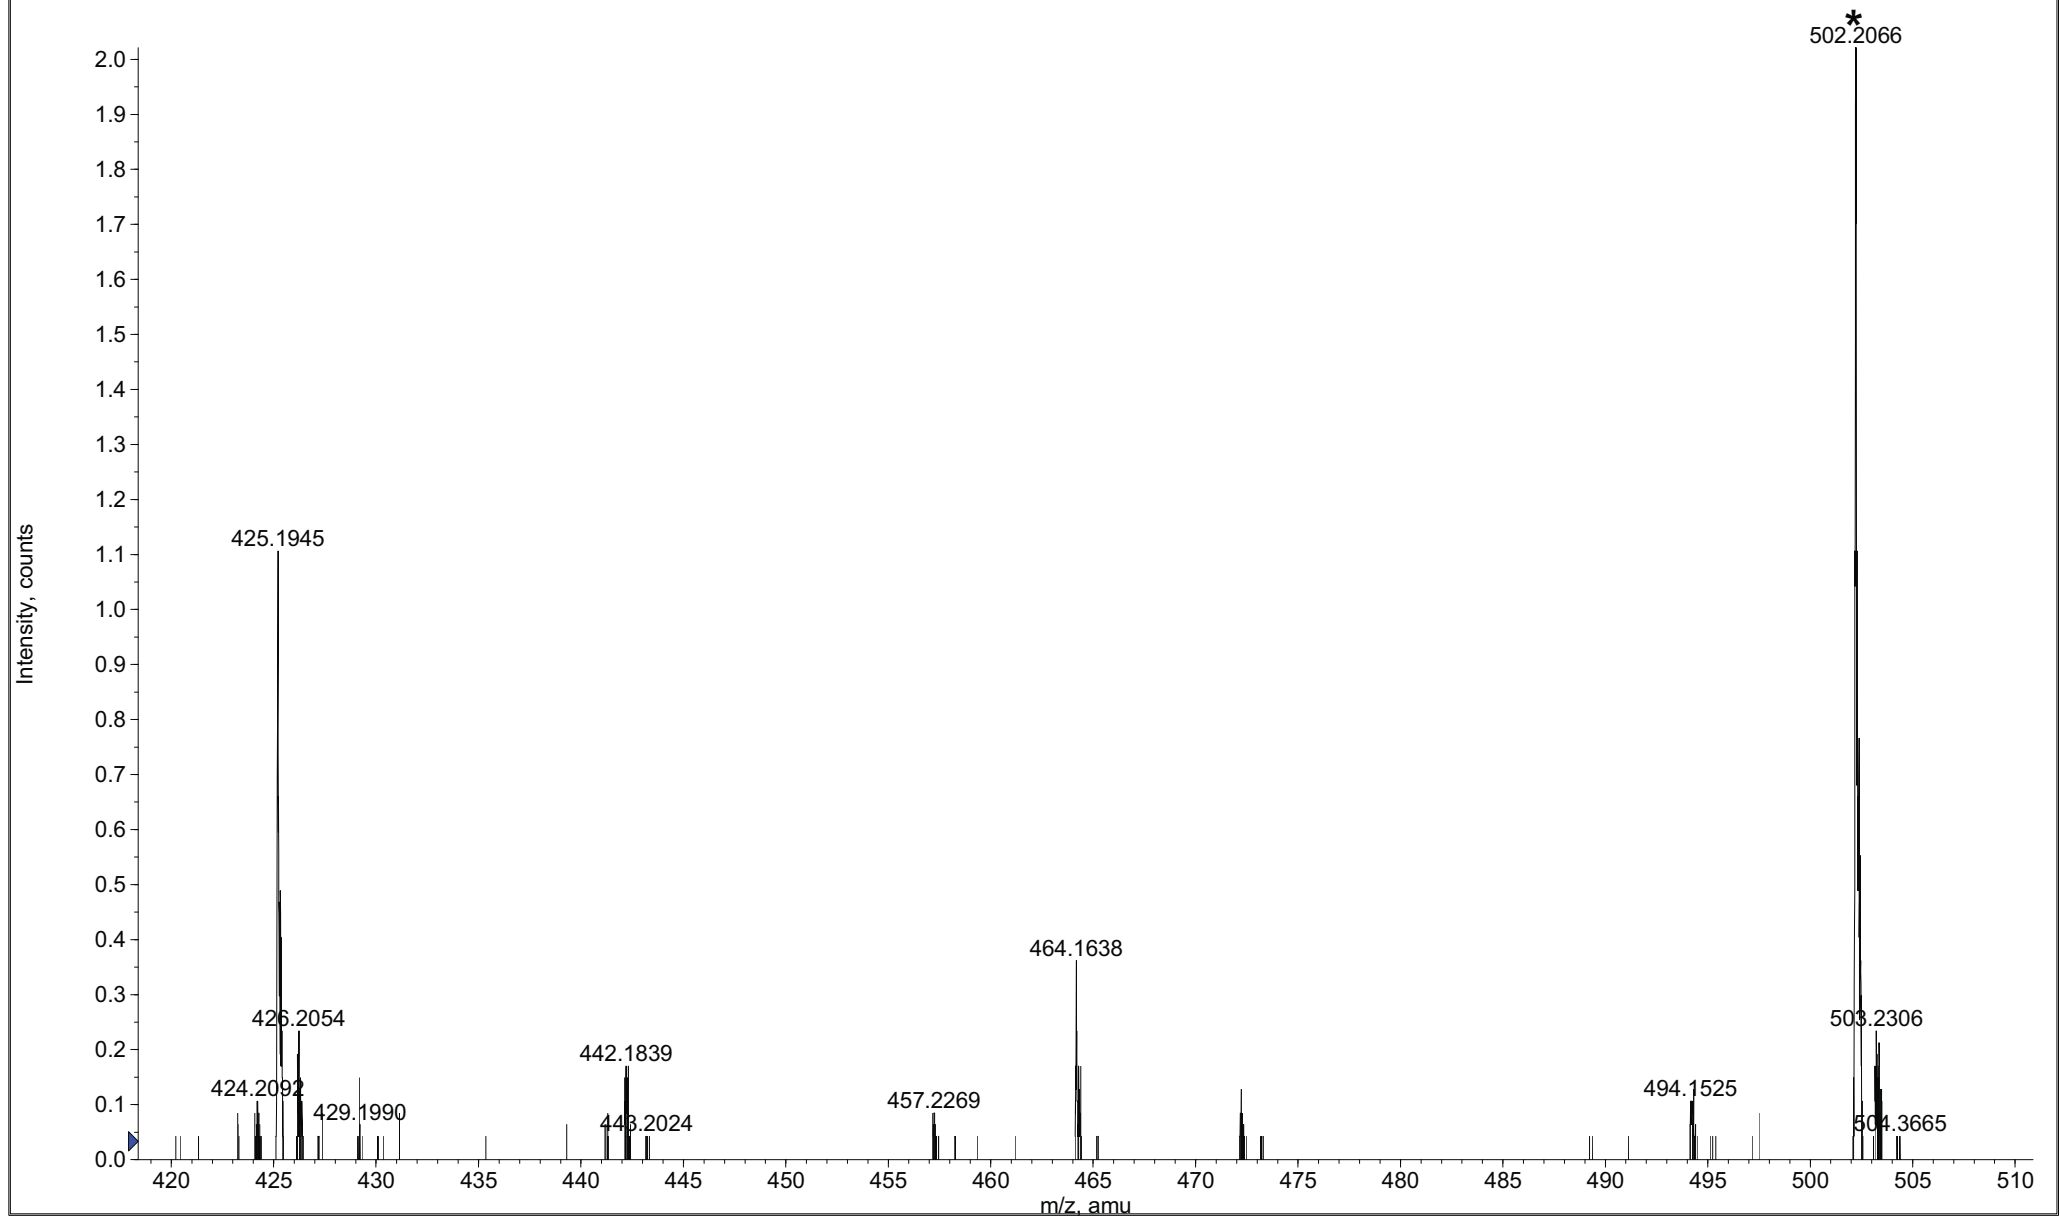

Cartesian coordinates for energy-minimized conformer of **2** optimized at the B3LYP/6-31G(d) level in methanol

| Center<br>Number | Atomic<br>Number | Atomic<br>Type | Coordinates (Angstroms) |           |           |
|------------------|------------------|----------------|-------------------------|-----------|-----------|
|                  |                  |                | X                       | Y         | Z         |
| 1                | 6                | 0              | 4.042697                | -1.904809 | 0.905594  |
| 2                | 6                | 0              | 4.788297                | -0.667009 | 0.431894  |
| 3                | 6                | 0              | 4.031596                | 0.671891  | 0.319194  |
| 4                | 6                | 0              | 2.550396                | 0.505591  | -0.074606 |
| 5                | 6                | 0              | 2.022497                | -0.905509 | -0.344906 |
| 6                | 6                | 0              | 2.516597                | -1.792409 | 0.837994  |
| 7                | 6                | 0              | 1.749296                | 1.591391  | -0.186406 |
| 8                | 6                | 0              | 0.339196                | 1.558091  | -0.624306 |
| 9                | 6                | 0              | -0.337704               | 0.225590  | -0.914706 |
| 10               | 6                | 0              | 0.453797                | -0.971509 | -0.314306 |
| 11               | 6                | 0              | -1.775504               | 0.181590  | -0.190906 |
| 12               | 6                | 0              | -2.423503               | -1.304910 | -0.224406 |
| 13               | 6                | 0              | -1.619203               | -2.213110 | -1.156406 |
| 14               | 6                | 0              | -0.129103               | -2.293110 | -0.873606 |
| 15               | 6                | 0              | -1.584604               | 0.633790  | 1.284094  |
| 16               | 6                | 0              | -2.505904               | 0.109490  | 2.385694  |
| 17               | 8                | 0              | -2.649703               | -1.327610 | 2.288094  |
| 18               | 6                | 0              | -2.412603               | -2.020610 | 1.156694  |
| 19               | 8                | 0              | 5.987297                | -0.728908 | 0.208194  |
| 20               | 6                | 0              | 4.129696                | 1.278691  | 1.755794  |
| 21               | 6                | 0              | 4.782996                | 1.578391  | -0.682106 |
| 22               | 6                | 0              | 2.641997                | -1.430509 | -1.669406 |
| 23               | 6                | 0              | -3.935303               | -1.303010 | -0.584206 |
| 24               | 6                | 0              | -2.165503               | -2.924710 | -2.145806 |
| 25               | 6                | 0              | -0.391504               | 0.215690  | -2.471506 |
| 26               | 8                | 0              | 2.176696                | 2.868791  | 0.041194  |
| 27               | 8                | 0              | -0.203304               | 2.633590  | -0.895206 |
| 28               | 8                | 0              | -2.322703               | -3.225910 | 1.245394  |
| 29               | 8                | 0              | -0.670404               | 1.360090  | 1.624394  |
| 30               | 6                | 0              | -3.865504               | 0.784590  | 2.545994  |
| 31               | 6                | 0              | -2.716704               | 1.204090  | -0.874106 |
| 32               | 8                | 0              | -3.077404               | 2.184190  | -0.034206 |
| 33               | 8                | 0              | -3.098904               | 1.128990  | -2.021506 |
| 34               | 6                | 0              | -3.905404               | 3.231690  | -0.588206 |
| 35               | 1                | 0              | 4.367797                | -2.111009 | 1.933794  |
| 36               | 1                | 0              | 4.417297                | -2.740409 | 0.304694  |
| 37               | 1                | 0              | 2.086197                | -2.796009 | 0.754094  |
| 38               | 1                | 0              | 2.130997                | -1.362709 | 1.770194  |
| 39               | 1                | 0              | 0.229497                | -0.950309 | 0.758894  |
| 40               | 1                | 0              | 0.051897                | -3.100310 | -0.154106 |
| 41               | 1                | 0              | 0.373497                | -2.581509 | -1.799106 |
| 42               | 1                | 0              | -1.940404               | 0.257890  | 3.308594  |
| 43               | 1                | 0              | 3.649496                | 0.634591  | 2.500394  |
| 44               | 1                | 0              | 3.641196                | 2.254491  | 1.778894  |
| 45               | 1                | 0              | 5.182296                | 1.401791  | 2.032394  |
| 46               | 1                | 0              | 4.338096                | 2.573191  | -0.705006 |
| 47               | 1                | 0              | 4.745396                | 1.155991  | -1.692206 |
| 48               | 1                | 0              | 5.832596                | 1.658191  | -0.390006 |
| 49               | 1                | 0              | 3.718497                | -1.240309 | -1.711906 |
| 50               | 1                | 0              | 2.204897                | -0.948509 | -2.546106 |
| 51               | 1                | 0              | 2.508497                | -2.512409 | -1.769306 |
| 52               | 1                | 0              | -4.336103               | -2.312710 | -0.468306 |
| 53               | 1                | 0              | -4.506503               | -0.642210 | 0.071494  |
| 54               | 1                | 0              | -4.086303               | -0.976510 | -1.612406 |
| 55               | 1                | 0              | -1.543203               | -3.553410 | -2.778106 |
| 56               | 1                | 0              | -3.225803               | -2.924710 | -2.369506 |
| 57               | 1                | 0              | -0.906904               | 1.100790  | -2.838906 |
| 58               | 1                | 0              | 0.629396                | 0.242291  | -2.860406 |
| 59               | 1                | 0              | -0.891203               | -0.665110 | -2.869106 |
| 60               | 1                | 0              | 1.407496                | 3.427491  | -0.211106 |
| 61               | 1                | 0              | -4.497304               | 0.691390  | 1.662494  |
| 62               | 1                | 0              | -3.721004               | 1.847590  | 2.757194  |
| 63               | 1                | 0              | -4.377504               | 0.325690  | 3.396894  |
| 64               | 1                | 0              | -3.355804               | 3.755990  | -1.372506 |
| 65               | 1                | 0              | -4.119704               | 3.898990  | 0.244894  |
| 66               | 1                | 0              | -4.825904               | 2.809890  | -0.995806 |

Cartesian coordinates for energy-minimized conformer of **3** optimized at the B3LYP/6-31G(d) level in methanol

| Center<br>Number | Atomic<br>Number | Atomic<br>Type | Coordinates (Angstroms) |           |           |
|------------------|------------------|----------------|-------------------------|-----------|-----------|
|                  |                  |                | X                       | Y         | Z         |
| 1                | 6                | 0              | 1.503192                | -1.831415 | 0.828106  |
| 2                | 6                | 0              | 2.365495                | -1.220919 | -0.266194 |
| 3                | 6                | 0              | 3.258900                | -0.038622 | 0.207906  |
| 4                | 6                | 0              | 2.701106                | 1.360580  | -0.123294 |
| 5                | 6                | 0              | 1.347207                | 1.764286  | 0.514706  |
| 6                | 6                | 0              | 0.109004                | 0.988091  | -0.111294 |
| 7                | 6                | 0              | -0.497101               | -0.127307 | 0.767806  |
| 8                | 6                | 0              | 0.328695                | -1.314210 | 1.224906  |
| 9                | 6                | 0              | 3.337291                | -2.175623 | -0.983894 |
| 10               | 6                | 0              | 4.634394                | -1.501128 | -1.075594 |
| 11               | 6                | 0              | 4.611899                | -0.314928 | -0.432694 |
| 12               | 6                | 0              | 1.055713                | 3.249687  | 0.164206  |
| 13               | 6                | 0              | -0.466586               | 3.374093  | 0.210706  |
| 14               | 6                | 0              | -0.929491               | 2.111295  | -0.537694 |
| 15               | 6                | 0              | -2.443093               | 1.793101  | -0.436294 |
| 16               | 6                | 0              | -3.295387               | 3.054105  | -0.717094 |
| 17               | 6                | 0              | -2.843397               | 0.716203  | -1.421994 |
| 18               | 6                | 0              | -3.734801               | -0.283393 | -1.253094 |
| 19               | 6                | 0              | -4.480302               | -0.579090 | -0.037294 |
| 20               | 6                | 0              | -5.385206               | -1.567487 | 0.147906  |
| 21               | 6                | 0              | -6.073907               | -1.735984 | 1.479306  |
| 22               | 6                | 0              | -5.797911               | -2.569085 | -0.900894 |
| 23               | 8                | 0              | 3.048586                | -3.281021 | -1.431194 |
| 24               | 6                | 0              | 2.083787                | -3.028117 | 1.550406  |
| 25               | 6                | 0              | 5.757403                | 0.638167  | -0.304594 |
| 26               | 6                | 0              | 1.430107                | 1.656285  | 2.053606  |
| 27               | 1                | 0              | 1.716596                | -0.862916 | -1.071994 |
| 28               | 1                | 0              | 3.398300                | -0.101823 | 1.297206  |
| 29               | 1                | 0              | 2.613606                | 1.451480  | -1.215894 |
| 30               | 1                | 0              | 3.444909                | 2.106477  | 0.188406  |
| 31               | 1                | 0              | 0.439202                | 0.525589  | -1.045394 |
| 32               | 1                | 0              | -0.915699               | 0.323095  | 1.678706  |
| 33               | 1                | 0              | -1.367502               | -0.533903 | 0.236606  |
| 34               | 1                | 0              | -0.159608               | -1.842008 | 2.047106  |
| 35               | 1                | 0              | 5.488192                | -1.935631 | -1.585994 |
| 36               | 1                | 0              | 1.403414                | 3.471085  | -0.854794 |
| 37               | 1                | 0              | 1.575616                | 3.938585  | 0.840606  |
| 38               | 1                | 0              | -0.825482               | 4.297695  | -0.254394 |
| 39               | 1                | 0              | -0.828886               | 3.370195  | 1.247906  |
| 40               | 1                | 0              | -0.738090               | 2.308994  | -1.603894 |
| 41               | 1                | 0              | -2.671594               | 1.468802  | 0.585706  |
| 42               | 1                | 0              | -4.361588               | 2.807009  | -0.678194 |
| 43               | 1                | 0              | -3.102684               | 3.843504  | 0.016806  |
| 44               | 1                | 0              | -3.081586               | 3.459204  | -1.714394 |
| 45               | 1                | 0              | -2.380697               | 0.810801  | -2.406094 |
| 46               | 1                | 0              | -3.912104               | -0.931393 | -2.109394 |
| 47               | 1                | 0              | -4.287700               | 0.073309  | 0.813406  |
| 48               | 1                | 0              | -7.165007               | -1.653379 | 1.372406  |
| 49               | 1                | 0              | -5.745304               | -0.989485 | 2.209406  |
| 50               | 1                | 0              | -5.881911               | -2.733784 | 1.899006  |
| 51               | 1                | 0              | -6.879310               | -2.506780 | -1.086694 |
| 52               | 1                | 0              | -5.605215               | -3.592586 | -0.550394 |
| 53               | 1                | 0              | -5.285610               | -2.439687 | -1.856494 |
| 54               | 1                | 0              | 3.080688                | -2.799021 | 1.955206  |
| 55               | 1                | 0              | 2.212784                | -3.879918 | 0.873406  |
| 56               | 1                | 0              | 1.447286                | -3.339015 | 2.384406  |
| 57               | 1                | 0              | 6.681201                | 0.214364  | -0.707894 |
| 58               | 1                | 0              | 5.922304                | 0.908367  | 0.746406  |
| 59               | 1                | 0              | 5.548307                | 1.574168  | -0.837894 |
| 60               | 1                | 0              | 0.549309                | 2.093689  | 2.536506  |
| 61               | 1                | 0              | 2.307709                | 2.207682  | 2.414106  |
| 62               | 1                | 0              | 1.515403                | 0.623885  | 2.400206  |

Cartesian coordinates for energy-minimized conformer of **12** optimized at the B3LYP/6-31G(d) level in methanol

| Center<br>Number | Atomic<br>Number | Atomic<br>Type | Coordinates (Angstroms) |           |           |
|------------------|------------------|----------------|-------------------------|-----------|-----------|
|                  |                  |                | X                       | Y         | Z         |
| 1                | 6                | 0              | 1.757700                | -2.110100 | 0.292000  |
| 2                | 6                | 0              | 2.534600                | -1.096000 | -0.542300 |
| 3                | 6                | 0              | 2.191700                | 0.381300  | -0.185700 |
| 4                | 6                | 0              | 0.631300                | 0.544900  | -0.264000 |
| 5                | 6                | 0              | -0.282400               | -0.530800 | 0.444300  |
| 6                | 6                | 0              | 0.247300                | -1.948300 | 0.101600  |
| 7                | 6                | 0              | 0.108500                | 1.946700  | 0.055500  |
| 8                | 6                | 0              | -1.351700               | 2.111500  | 0.030800  |
| 9                | 6                | 0              | -2.230100               | 1.095000  | -0.054900 |
| 10               | 6                | 0              | -1.737600               | -0.360400 | -0.150400 |
| 11               | 6                | 0              | 2.814700                | 0.761800  | 1.177700  |
| 12               | 6                | 0              | 2.840500                | 1.273600  | -1.270800 |
| 13               | 6                | 0              | -0.327700               | -0.355400 | 1.980500  |
| 14               | 6                | 0              | -2.739700               | -1.342200 | 0.519600  |
| 15               | 6                | 0              | -3.705100               | 1.382000  | -0.152300 |
| 16               | 8                | 0              | 0.823500                | 2.925600  | 0.269100  |
| 17               | 8                | 0              | -1.697000               | -0.678800 | -1.550300 |
| 18               | 8                | 0              | -3.839000               | -1.536600 | -0.381700 |
| 19               | 8                | 0              | 3.943500                | -1.354700 | -0.494000 |
| 20               | 1                | 0              | 2.058400                | -3.119000 | -0.015100 |
| 21               | 1                | 0              | 2.033300                | -2.016300 | 1.351400  |
| 22               | 1                | 0              | 2.272000                | -1.250800 | -1.597500 |
| 23               | 1                | 0              | 0.391100                | 0.420700  | -1.331600 |
| 24               | 1                | 0              | -0.004200               | -2.169300 | -0.940800 |
| 25               | 1                | 0              | -0.263200               | -2.697700 | 0.717200  |
| 26               | 1                | 0              | -1.697500               | 3.142200  | 0.082100  |
| 27               | 1                | 0              | 2.559800                | 0.067000  | 1.983100  |
| 28               | 1                | 0              | 2.494900                | 1.760600  | 1.478500  |
| 29               | 1                | 0              | 3.907500                | 0.777000  | 1.092900  |
| 30               | 1                | 0              | 3.906800                | 1.038400  | -1.347200 |
| 31               | 1                | 0              | 2.386000                | 1.091500  | -2.253400 |
| 32               | 1                | 0              | 2.727800                | 2.332400  | -1.032900 |
| 33               | 1                | 0              | 0.659100                | -0.496700 | 2.423900  |
| 34               | 1                | 0              | -0.686900               | 0.633800  | 2.278600  |
| 35               | 1                | 0              | -0.986200               | -1.100200 | 2.440100  |
| 36               | 1                | 0              | -2.251200               | -2.299500 | 0.712200  |
| 37               | 1                | 0              | -3.099300               | -0.941800 | 1.473700  |
| 38               | 1                | 0              | -3.890700               | 2.459300  | -0.127700 |
| 39               | 1                | 0              | -4.270300               | 0.913800  | 0.661300  |
| 40               | 1                | 0              | -4.115500               | 0.978400  | -1.084600 |
| 41               | 1                | 0              | -2.567000               | -1.090600 | -1.729900 |
| 42               | 1                | 0              | -4.132100               | -2.457200 | -0.309100 |
| 43               | 1                | 0              | 4.207100                | -1.342800 | 0.440400  |
